# Supplementary material for: Catalyst-controlled site-selective N–H and C3-arylation of carbazole via carbene transfer reactions
Source: Royal Society of Chemistry journal article supplement (doi:10.1039/d1cc01863a), 2021-01-01

## Supporting Information

### Catalyst-Controlled Site-Selective N-H and C3-Arylation of Carbazole *via* Carbene Transfer Reactions

Sourav Sekhar Bera,<sup>#</sup> Srishti Ballabh Bahukhandi,<sup>#</sup> Claire Empel,<sup>#</sup> Rene M. Koenigs\*<sup>#</sup>

<sup>#</sup>RWTH Aachen University, Institute of Organic Chemistry, Landoltweg 1, D-52074 Aachen,  
Germany

[rene.koenigs@rwth-aachen.de](mailto:rene.koenigs@rwth-aachen.de)

#### Table of Content

|                              |     |
|------------------------------|-----|
| General Information          | S1  |
| General procedures           | S2  |
| Reaction optimization        | S4  |
| Scale-up experiment          | S8  |
| Characterisation of products | S9  |
| References                   | S30 |
| Spectra                      | S31 |

## General Information

Unless otherwise noted, all commercially available compounds were used as provided without further purification. Chemicals used in this manuscript were purchased from Sigma Aldrich, Alfa Aesar, Fluorochem, Carl Roth and Evonik Industries (for Pd/C). Solvents used in reactions were p.A. grade. Solvents for chromatography were technical grade and distilled prior to use. Analytical thin-layer chromatography (TLC) was performed on Macherey-Nagel silica gel aluminium plates with F-254 indicator, visualised by irradiation with UV light. Column chromatography was performed using silica gel Merck 60 (particle size 0.063 - 0.2 mm). Solvent mixtures are understood as volume/volume.  $^1\text{H}$  NMR,  $^{19}\text{F}$  NMR and  $^{13}\text{C}$  NMR were recorded on a Varian AV600/AV400 or an Agilent DD2 400 NMR spectrometer in  $\text{CDCl}_3$ . Data are reported in the following order: chemical shift ( $\delta$ ) in ppm; multiplicities are indicated br (broadened singlet), s (singlet), d (doublet), t (triplet), q (quartet), m (multiplet); coupling constants ( $J$ ) are in Hertz (Hz). HRMS data were recorded on a ThermoFisher Scientific LTQ Orbitrap XL using ESI ionization or on a Finnigan MAT 95 using EI ionization at 70 eV. IR spectra were recorded on a Perkin Elmer-100 spectrometer and are reported in terms of frequency of absorption ( $\text{cm}^{-1}$ ). LEDs used in this manuscript were purchased from Conrad Electronics: High Power LED-Module, 3 W, 30 lm, 470 nm, art.nr. 180745 – 62.

## General procedures

### General procedure for the preparation the 1-diazonaphthalen-2(1H)-one (GP-1)

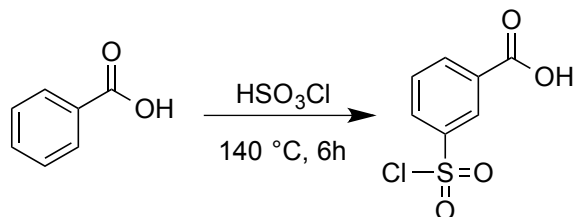

All diazoalkanes were synthesized according to the reported literature procedure.<sup>1, 2</sup> In a 250 mL oven-dried round-bottom flask, benzoic acid (6.1 g, 50 mmol) was added in one portion to chlorosulfonic acid (25.0 mL) under stirring at room temperature. The mixture was heated at  $140\text{ }^\circ\text{C}$  in an oil-bath for 6 hours. After completion of the reaction, the mixture was cooled down to room temperature. The resulting solution was slowly poured into finely crushed ice (100 g) maintaining temperature lower than  $25\text{ }^\circ\text{C}$ . A colorless precipitate was formed and filtered off by washing with cold water ( $2\times 25\text{ mL}$ ). Then, the product was dried in vacuo (at  $40\text{ }^\circ\text{C}$ ) for 1 hour to give 3-(chlorosulfonyl)benzoic acid as colorless powder (9.4 g, 85%) and the product was used for the next without further purification.

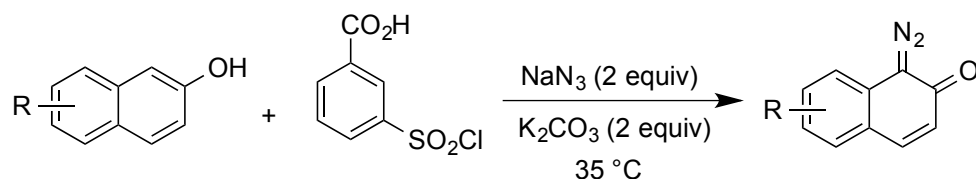

To a stirred solution of sodium azide (0.65 g, 10 mmol) in water (15 mL), potassium carbonate (1.38 g, 1 mmol) was added. After that, 3-(chlorosulfonyl)benzoic acid (2.2 g, 10 mmol) was added to the mixture and stirred for 10 min at room temperature. 2-Naphthol derivatives (5 mmol) were then slowly transferred to the reaction mixture and 2 mL of MeCN was added further. The reaction mixture was vigorously stirred for 10 hour at  $35\text{ }^\circ\text{C}$ . After completion of the reaction. the product was diluted and extracted with dichloromethane ( $3\times 50\text{ mL}$ ), the organic layer was dried over magnesium sulphate and evaporated to dryness to afford diazo carbonyl compound. The crude product was purified by silica gel column chromatography using *n*-hexane/ ethyl acetate eluent to obtain the product as dark brown solid.

### General procedure for the gold-catalyzed C3-arylation of carbazole (GP-2)

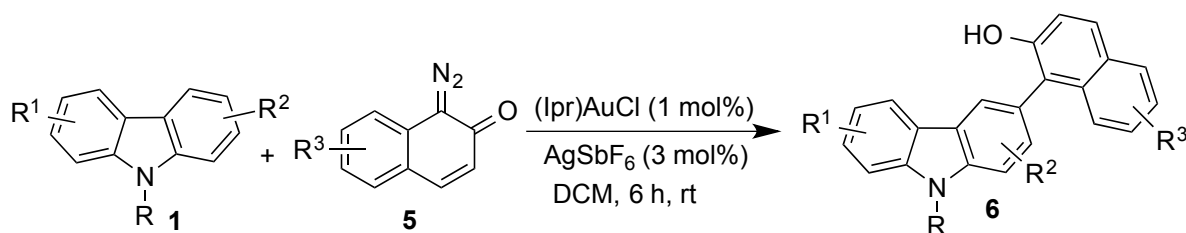

In a 10.0 mL oven-dried reaction tube, carbazole **1** (0.3 mmol, 1.5 equiv), [1,3-bis(2,6-diisopropylphenyl)imidazol-2-ylidene]AuCl (1 mol%, 1.2 mg) and AgSbF<sub>6</sub> (3 mol%, 2.1 mg) were taken and 1.0 mL of dry DCM was added. In another reaction tube, diazoalkane **5** (0.2 mmol, 1.0 equiv) was dissolved in 1 mL dry DCM and added to the reaction mixture over 1 hour *via* syringe pump. The reaction mixture was allowed to stir for 6 hours. After completion of the reaction, the crude product was purified by silica gel column chromatography using *n*-pentane/ diethyl ether as eluent.

### General procedure for the palladium-catalyzed N-H arylation of carbazole (GP-3)

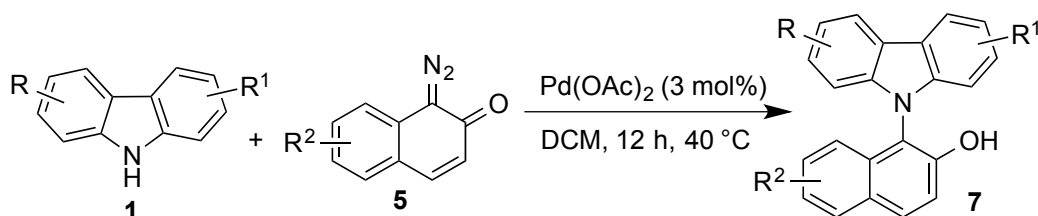

In a 10.0 mL oven dried reaction tube, carbazole or heterocycle **1** (0.2 mmol, 1.0 equiv), diazoalkane **5** (0.3 mmol, 1.5 equiv), Pd(OAc)<sub>2</sub> (3 mol%, 1.4 mg) were taken and 2.0 mL of dry DCM was added. The reaction mixture was allowed to stir at 40 °C for 12 hours. After completion of the reaction, the crude product was purified by silica gel column chromatography using *n*-pentane/ diethyl ether as eluent.

## Reaction Optimization

**Table S1. Optimization table for C3-arylation of carbazole**

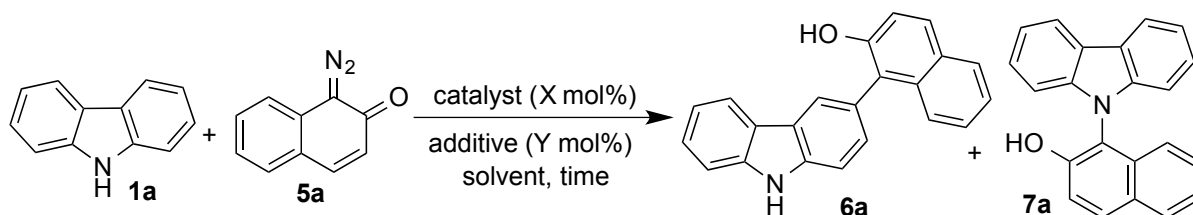

| Entry <sup>a</sup> | 1a/5a (equiv) | Catalyst (X mol%)                         | Additive (Y mol%)       | Solvent           | Reaction time (h) <sup>b</sup> | Yield (%) <sup>c</sup><br>6a/7a |
|--------------------|---------------|-------------------------------------------|-------------------------|-------------------|--------------------------------|---------------------------------|
| 1                  | 1: 1          | ( <sup>t</sup> Bu <sub>3</sub> P)AuCl (5) | AgSbF <sub>6</sub> (10) | DCM               | 12 (3)                         | 22/-                            |
| 2                  | 1: 1          | (L <sup>1</sup> )AuCl (5)                 | AgSbF <sub>6</sub> (10) | DCM               | 12 (3)                         | -/-                             |
| 3                  | 1: 1          | (Ipr)AuCl (5)                             | AgSbF <sub>6</sub> (10) | DCM               | 12 (3)                         | 52(12) <sup>d</sup> /3          |
| 4                  | 1.5:1         | (Ipr)AuCl (3)                             | AgSbF <sub>6</sub> (6)  | DCM               | 3.5 (3)                        | 68/5                            |
| 5                  | 1:1           | (Ipr)AuCl (3)                             | AgSbF <sub>6</sub> (6)  | DCM               | 3.5 (3)                        | 63/4                            |
| 6                  | 1:1.5         | (Ipr)AuCl (3)                             | AgSbF <sub>6</sub> (6)  | DCM               | 3.5 (3)                        | 60(14) <sup>d</sup> /-          |
| 7                  | 1:2           | (Ipr)AuCl (3)                             | AgSbF <sub>6</sub> (6)  | DCM               | 3.5 (3)                        | 54(18) <sup>d</sup> /-          |
| 8                  | 1.5:1         | (Ipr)AuCl (3)                             | AgSbF <sub>6</sub> (6)  | THF               | 3.5 (3)                        | -/-                             |
| 9                  | 1.5:1         | (Ipr)AuCl (3)                             | AgSbF <sub>6</sub> (6)  | 1,4-dioxane       | 3.5 (3)                        | 5/-                             |
| 10                 | 1.5:1         | (Ipr)AuCl (3)                             | AgSbF <sub>6</sub> (6)  | 1,2-DCE           | 3.5 (3)                        | 59/4                            |
| 11                 | 1.5:1         | (Ipr)AuCl (3)                             | AgSbF <sub>6</sub> (6)  | CHCl <sub>3</sub> | 3.5 (3)                        | 56/5                            |
| 12                 | 1.5:1         | (Ipr)AuCl (3)                             | AgSbF <sub>6</sub> (6)  | MeCN              | 3.5 (3)                        | 5/-                             |
| 13                 | 1.5:1         | (Ipr)AuCl (3)                             | AgSbF <sub>6</sub> (6)  | DCM               | 2.5 (2)                        | 70/5                            |
| 14                 | 1.5:1         | (Ipr)AuCl (3)                             | AgSbF <sub>6</sub> (6)  | DCM               | 1.5 (1)                        | 72/6                            |
| 15                 | 1.5:1         | (Ipr)AuCl (3)                             | AgSbF <sub>6</sub> (6)  | DCM               | 1.0 (0.5)                      | 68/5                            |
| 16                 | 1.5:1         | (Ipr)AuCl (3)                             | AgSbF <sub>6</sub> (6)  | DCM               | 0.5 (0.25)                     | 67/5                            |
| 17                 | 1.5: 1        | ( <sup>t</sup> Bu <sub>3</sub> P)AuCl (3) | AgSbF <sub>6</sub> (6)  | DCM               | 1.5 (1)                        | 20/-                            |
| 18                 | 1.5:1         | <sup>t</sup> BuXPhos AuCl (3)             | AgSbF <sub>6</sub> (6)  | DCM               | 1.5 (1)                        | 14/-                            |

|    |       |                                                                            |                                                  |     |         |      |
|----|-------|----------------------------------------------------------------------------|--------------------------------------------------|-----|---------|------|
| 19 | 1.5:1 | dppf(AuCl) <sub>2</sub> (3)                                                | AgSbF <sub>6</sub> (6)                           | DCM | 1.5 (1) | -/-  |
| 20 | 1.5:1 | (L <sup>2</sup> )AuN(SO <sub>2</sub> CF <sub>3</sub> ) <sub>2</sub><br>(3) | AgSbF <sub>6</sub> (6)                           | DCM | 1.5 (1) | 8/-  |
| 21 | 1.5:1 | JohnPhosAuCl (3)                                                           | AgSbF <sub>6</sub> (6)                           | DCM | 1.5 (1) | 35/- |
| 22 | 1.5:1 | (IMes)AuCl (3)                                                             | AgSbF <sub>6</sub> (6)                           | DCM | 1.5 (1) | 36/- |
| 23 | 1.5:1 | (Ipr)AuCl (2)                                                              | AgSbF <sub>6</sub> (4)                           | DCM | 1.5 (1) | 73/3 |
| 24 | 1.5:1 | (Ipr)AuCl (1)                                                              | AgSbF <sub>6</sub> (3)                           | DCM | 1.5 (1) | 57/- |
| 25 | 1.5:1 | (Ipr)AuCl (0.5)                                                            | AgSbF <sub>6</sub> (2)                           | DCM | 1.5 (1) | 48/- |
| 26 | 1.5:1 | (Ipr)AuCl (1)                                                              | AgSbF <sub>6</sub> (3)                           | DCM | 6 (1)   | 76/3 |
| 27 | 1.5:1 | (Ipr)AuCl (1)                                                              | AgPF <sub>6</sub> (3)                            | DCM | 6 (1)   | 66/- |
| 28 | 1.5:1 | (Ipr)AuCl (1)                                                              | AgNTf <sub>2</sub> (3)                           | DCM | 6 (1)   | 51/- |
| 29 | 1.5:1 | (Ipr)AuCl (1)                                                              | AgBF <sub>4</sub> (3)                            | DCM | 6 (1)   | 53/- |
| 30 | 1.5:1 | -                                                                          | AgSbF <sub>6</sub> (3)                           | DCM | 6 (1)   | -/-  |
| 31 | 1.5:1 | (Ipr)AuCl (1)                                                              | -                                                | DCM | 6 (1)   | -/-  |
| 32 | 1.5:1 | (Ipr)AuCl (1)                                                              | (Trop)BF <sub>4</sub><br>(5)                     | DCM | 6 (1)   | -/-  |
| 33 | 1.5:1 | -                                                                          | (Trop)BF <sub>4</sub><br>(10)                    | DCM | 6 (1)   | -/-  |
| 34 | 1.5:1 | (Ipr)AuCl (1)                                                              | (Ph <sub>3</sub> C)BF <sub>4</sub><br>(5)        | DCM | 6 (1)   | -/-  |
| 35 | 1.5:1 | -                                                                          | (Ph <sub>3</sub> C)BF <sub>4</sub><br>(5)        | DCM | 6 (1)   | -/-  |
| 36 | 1.5:1 | (Ipr)AuCl (1)                                                              | HBf <sub>4</sub> (5)                             | DCM | 6 (1)   | -/-  |
| 37 | 1.5:1 | -                                                                          | HBf <sub>4</sub> (10)                            | DCM | 6 (1)   | -/-  |
| 38 | 1.5:1 | (Ipr)AuCl (1)                                                              | AgSbF <sub>6</sub> (3) +<br>HBf <sub>4</sub> (5) | DCM | 6 (1)   | 61/- |
| 39 | 1:1   | Blue light<br>(470 nm)                                                     | -                                                | DCM | 6       | -/-  |

<sup>a</sup>Reaction conditions: Limiting substrate was taken in 0.2 mmol scale and dissolved in 2.0 mL of solvent. <sup>b</sup>time of slow addition was reported in bracket, <sup>c</sup>isolated yield. <sup>d</sup>In the parenthesis diproduct 1,1'-(9H-carbazole-3,6-diyl)bis(naphthalen-2-ol), **9** is reported. L<sup>1</sup> = Tris(2,4-di-tert-butylphenyl)phosphite, *t*BuXPhosAuCl = 2-Di-tert-butylphosphin-2',4',6'-triisopropylbiphenyl, dppf = 1,1'-bis-(diphenylphosphino)ferrocene, L<sup>2</sup> = Tri-tert-butylphosphine, JohnPhos = (2-Biphenyl)-di-tert-butylphosphine, Ipr = 1,3-bis(2,6-diisopropylphenyl)imidazol-2-ylidene, IMes = 1,3-dimesitylimidazol-2-ylidene, Trop = Tropylium. In case of no product formation, diazoalkane **5a** stayed untouched in the reaction mixture.

## Reaction Optimization

**Table S2. Optimization table for N-H arylation of carbazole**

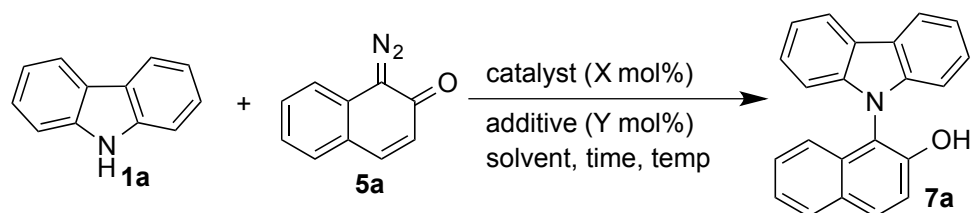

| Entry <sup>a</sup> | Catalyst<br>(X mol%)                                  | Additive<br>(Y mol%)  | Solvent | Temp<br>(°C) | Time<br>(h) | Yield<br>(7a) (%) <sup>b</sup> |
|--------------------|-------------------------------------------------------|-----------------------|---------|--------------|-------------|--------------------------------|
| 1                  | Pd(OAc) <sub>2</sub> (5)                              | -                     | DCM     | 25           | 24          | 45                             |
| 2                  | Pd(OAc) <sub>2</sub> (5)                              | -                     | DCM     | 32           | 24          | 74                             |
| 3                  | Pd(OAc) <sub>2</sub> (5)                              | -                     | DCM     | 40           | 24          | 81                             |
| 4                  | Pd(OAc) <sub>2</sub> (5)                              | PPh <sub>3</sub> (10) | DCM     | 40           | 24          | -                              |
| 5                  | Pd(OAc) <sub>2</sub> (5)                              | 2,2'-Bipyridine       | DCM     | 40           | 24          | -                              |
| 6                  | Pd(OAc) <sub>2</sub> (5)                              | Xantphos (10)         | DCM     | 40           | 24          | -                              |
| 7                  | Pd(OAc) <sub>2</sub> (5)                              | SPhos (10)            | DCM     | 40           | 24          | 6                              |
| 8                  | Pd(OAc) <sub>2</sub> (5)                              | XPhos (10)            | DCM     | 40           | 24          | 15                             |
| 9                  | Rh(OAc) <sub>2</sub> (5)                              | -                     | DCM     | 40           | 24          | 84                             |
| 10                 | Cu(OAc) <sub>2</sub> (5)                              | -                     | DCM     | 40           | 24          | -                              |
| 11                 | [Cu(OTf)] <sub>2</sub> .C <sub>6</sub> H <sub>6</sub> | -                     | DCM     | 40           | 24          | -                              |
| 12                 | [Cu(MeCN) <sub>4</sub> ]BF <sub>4</sub>               | -                     | DCM     | 40           | 24          | -                              |
| 13                 | Co(OAc) <sub>2</sub> (5)                              | -                     | DCM     | 40           | 24          | -                              |
| 14                 | Mn(OAc) <sub>2</sub> (5)                              | -                     | DCM     | 40           | 24          | -                              |
| 15                 | Pd(OAc) <sub>2</sub> (5)                              | -                     | DCM     | 40           | 18          | 85                             |
| 16                 | Pd(OAc) <sub>2</sub> (5)                              | -                     | DCM     | 40           | 12          | 90                             |
| 17                 | Pd(OAc) <sub>2</sub> (5)                              | -                     | DCM     | 40           | 6           | 82                             |
| 18                 | Pd(OAc) <sub>2</sub> (4)                              | -                     | DCM     | 40           | 12          | 88                             |

|                 |                                                        |                        |             |    |    |    |
|-----------------|--------------------------------------------------------|------------------------|-------------|----|----|----|
| 19              | Pd(OAc) <sub>2</sub> (3)                               | -                      | DCM         | 40 | 12 | 91 |
| 20              | Pd(OAc) <sub>2</sub> (2)                               | -                      | DCM         | 40 | 12 | 81 |
| 21              | Rh <sub>2</sub> (OAc) <sub>4</sub> (4)                 | -                      | DCM         | 40 | 12 | 87 |
| 22              | Rh <sub>2</sub> (OAc) <sub>4</sub> (4)                 | -                      | DCM         | 40 | 12 | 76 |
| 23              | Pd(OAc) <sub>2</sub> (3)                               | -                      | THF         | 40 | 12 | 85 |
| 24              | Pd(OAc) <sub>2</sub> (3)                               | -                      | 1,2-DCE     | 40 | 12 | 89 |
| 25              | Pd(OAc) <sub>2</sub> (3)                               | -                      | 1,4-dioxane | 40 | 12 | 69 |
| 26              | Pd(OAc) <sub>2</sub> (3)                               | -                      | Toluene     | 40 | 12 | 76 |
| 27              | Pd(OAc) <sub>2</sub> (3)                               | -                      | EtOAc       | 40 | 12 | 58 |
| 28              | Pd(CF <sub>3</sub> CO <sub>2</sub> ) <sub>2</sub> (3)  | -                      | DCM         | 40 | 12 | 86 |
| 29              | Pd(PPh <sub>3</sub> ) <sub>2</sub> Cl <sub>2</sub> (3) | -                      | DCM         | 40 | 12 | -  |
| 30              | Pd(PPh <sub>3</sub> ) <sub>4</sub> (3)                 | -                      | DCM         | 40 | 12 | -  |
| 31              | Pd(dba) <sub>2</sub> (3)                               | -                      | DCM         | 40 | 12 | 83 |
| 32              | PdCl <sub>2</sub> (3)                                  | -                      | DCM         | 40 | 12 | 89 |
| 33              | Pd/C (5 wt%) (3)                                       | -                      | DCM         | 40 | 12 | -  |
| 34              | Pd(OAc) <sub>2</sub> (3)                               | H <sub>2</sub> O (50)  | DCM         | 40 | 12 | 91 |
| 35              | Pd(OAc) <sub>2</sub> (3)                               | H <sub>2</sub> O (100) | DCM         | 40 | 12 | 88 |
| 36              | Pd(OAc) <sub>2</sub> (3)                               | AcOH (50)              | DCM         | 40 | 12 | 88 |
| 37              | Pd(OAc) <sub>2</sub> (3)                               | AcOH (100)             | DCM         | 40 | 12 | 86 |
| 38 <sup>c</sup> | Pd(OAc) <sub>2</sub> (3)                               | -                      | DCM         | 40 | 12 | 90 |
| 39 <sup>d</sup> | Pd(OAc) <sub>2</sub> (3)                               | -                      | DCM         | 40 | 12 | 82 |

<sup>a</sup>Reaction conditions: 0.2 mmol **1a** (1.0 equiv), 0.3 mmol **5a** (1.5 equiv), were dissolved in 2.0 mL of solvent, <sup>b</sup>Isolated yield, <sup>c</sup>2 equiv diazoalkane was taken, <sup>d</sup>1.2 equiv diazoalkane **5a** was taken. dba = bis(dibenzylideneacetone). In case of no product formation, diazoalkane **5a** stayed untouched in the reaction mixture.



## Scale-up Experiment

### Procedure for the scale-up experiment of the C3-arylation product (6a)

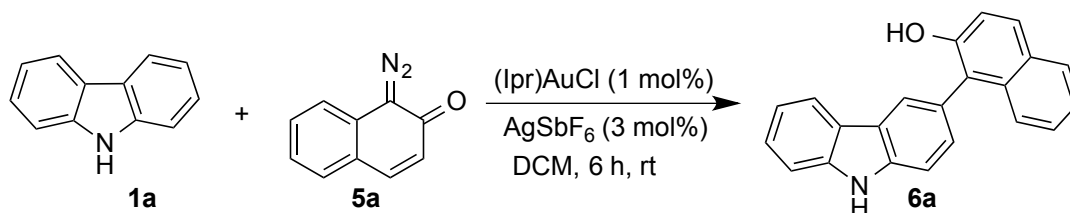

In a 30.0 mL oven dried reaction tube, carbazole **1** (4.5 mmol, 1.5 equiv), [1,3-bis(2,6-diisopropylphenyl)imidazol-2-ylidene]AuCl (1 mol%, 18.6 mg) and AgSbF<sub>6</sub> (3 mol%, 30.9 mg) were taken and 10.0 mL of dry DCM was added. In another reaction tube, diazoalkane **5a** (3 mmol, 1.0 equiv) was dissolved in 5 mL dry DCM and added to the reaction mixture over 1 hour *via* syringe pump. The reaction mixture was allowed to stir for 6 hours. After completion of the reaction, the crude product was directly purified by silica gel column chromatography (*n*-pentane : diethyl ether – 20:1 → 2:1) and obtained product **6a** as a colorless solid (0.41 g, 44%).

### Procedure for the scale-up experiment of the N-H arylation product (7a)

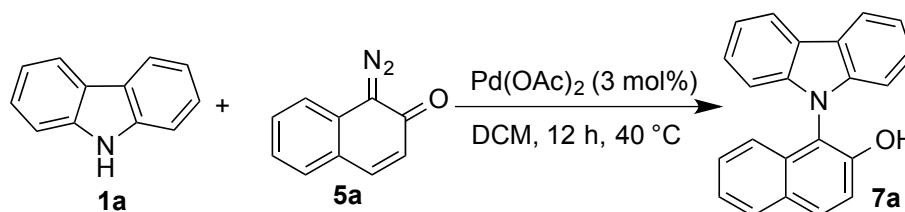

In a 30.0 mL oven dried reaction tube, carbazole **1a** (3.0 mmol, 0.5 g), diazoalkane **5a** (4.5 mmol, 0.77 g), Pd(OAc)<sub>2</sub> (0.09 mmol, 3 mol%, 20.2 mg) were taken and 10.0 mL of dry DCM was added it. The resultant reaction mixture was allowed to stir at 40 °C for 12 hours. After completion of the reaction, the crude product was directly purified by silica gel column chromatography (*n*-pentane : diethyl ether – 20:1 → 4:1) and obtained product **7a** as a colorless solid (0.76 g, 82%).

\* Use of 2 mol% Pd(OAc)<sub>2</sub> offered the product **7a** in 78% (0.72g) yield and 1 mol% Pd(OAc)<sub>2</sub> provided the product **7a** in 62% (0.57g) yield.

## Characterization of products

### 1-(9*H*-Carbazol-3-yl)naphthalen-2-ol (**6a**)

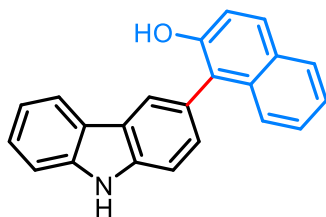

The title compound **6a** was synthesized according to the **GP-2** and isolated after silica gel column chromatography (*n*-pentane : diethyl ether – 20:1 → 2:1) as a colorless solid (76%, 46.9 mg).

**m.p.:** 186 – 188 °C.

**<sup>1</sup>H NMR** (600 MHz, CDCl<sub>3</sub>): δ = 8.16 (br, 1H), 8.15 (s, 1H), 8.06 (d, *J* = 7.8 Hz, 1H), 7.87 (d, *J* = 8.9 Hz, 2H), 7.60 (d, *J* = 8.2 Hz, 1H), 7.50 – 7.47 (m, 3H), 7.45 (dd, *J* = 8.2, 1.1 Hz, 1H), 7.37 – 7.33 (m, 3H), 7.30 – 7.27 (m, 1H), 5.37 (s, 1H) ppm

**<sup>13</sup>C NMR** (151 MHz, CDCl<sub>3</sub>): δ = 150.8, 140.0, 139.5, 134.1, 129.4, 129.1, 128.8, 128.2, 126.6, 126.5, 125.1, 124.6, 124.5, 123.4, 123.2, 123.1, 121.8, 120.7, 120.1, 117.4, 111.9, 111.0 ppm.

**HRMS** (APCI) *m/z*: [M]<sup>+</sup> Calcd. for C<sub>22</sub>H<sub>15</sub>NO<sup>+</sup> 309.1142; Found 309.1149.

**IR** (KBr): 3853, 3510, 3412, 3056, 2926, 2669, 2483, 2250, 2109, 1897, 1771, 1598, 1489, 1461, 1387, 1334, 1268, 1237, 1201, 1169, 1143, 1021, 984, 948, 904, 814, 727 cm<sup>-1</sup>.

### 1-(6-Fluoro-9*H*-carbazol-3-yl)naphthalen-2-ol (**6b**)

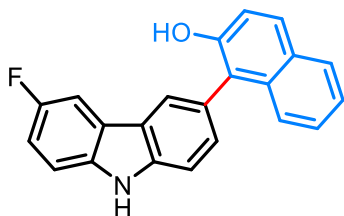

The title compound **6b** was synthesized according to the **GP-2** and isolated after silica gel column chromatography (*n*-pentane : diethyl ether – 20:1 → 2:1) as a colorless solid (65%, 42.7 mg).

**m.p.:** 152 – 156 °C.

**<sup>1</sup>H NMR** (600 MHz, CDCl<sub>3</sub>): δ = 8.09 (br, 1H), 7.96 (s, 1H), 7.75 – 7.74 (m, 2H), 7.57 (d, *J* = 8.7 Hz, 1H), 7.47 (d, *J* = 8.2 Hz, 1H), 7.35 – 7.32 (m, 2H), 7.28 – 7.22 (m, 4H), 7.09 (td, *J* = 8.9, 2.1 Hz, 1H), 5.22 (s, 1H) ppm.

**<sup>13</sup>C NMR** (151 MHz, CDCl<sub>3</sub>): δ = 157.8 (d, *J* = 236.4 Hz), 150.8, 140.5, 136.3, 134.1, 129.5 (d, *J* = 10.2 Hz), 129.1, 128.2, 126.6, 125.0, 124.8, 124.3 (d, *J* = 3.8 Hz), 123.4, 123.7, 123.6, 123.4, 121.6, 117.4, 114.5 (d, *J* = 25.5 Hz), 112.2, 111.6 (d, *J* = 9.3 Hz), 106.3 (d, *J* = 23.7 Hz) ppm.

**<sup>19</sup>F NMR** (565 MHz, Chloroform-*d*): δ = -123.49 – -123.53 (m) ppm.

**HRMS** (APCI) *m/z*: [M + H]<sup>+</sup> Calcd. for C<sub>22</sub>H<sub>15</sub>NOF<sup>+</sup> 328.1132; Found 328.1132.

**IR** (KBr): 3864, 3512, 3415, 3058, 2923, 2855, 2657, 2323, 2202, 2074, 1990, 1937, 1898, 1713, 1618, 1592, 1491, 1462, 1386, 1343, 1281, 1202, 1143, 1047, 953, 920, 859, 807, 741 cm<sup>-1</sup>.

**1-(7-Bromo-9H-carbazol-3-yl)naphthalen-2-ol (6c) and 1-(2-Bromo-9H-carbazol-3-yl)naphthalen-2-ol (6c')**

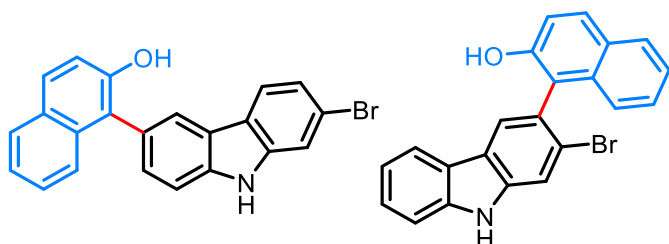

The title compound **6c** was synthesized according to the **GP-2** and isolated after silica gel column chromatography (*n*-pentane : diethyl ether – 20:1 → 2:1) as a colorless solid (68%, 52.8 mg).

**<sup>1</sup>H NMR** (600 MHz, CDCl<sub>3</sub>): δ = 8.22 (br, 1H), 8.10 (s, 0.72H), 8.08 (s, 0.28H), 7.99 (d, *J* = 7.7 Hz, 0.28H), 7.91 – 7.84 (m, 3H), 7.64 – 7.62 (m, 1.6H), 7.50 – 7.44 (m, 2H), 7.38 – 7.31 (m, 4H), 7.23 (d, *J* = 9.3 Hz, 0.28H), 5.27 (s, 0.73H), 5.01 (s, 0.26H) ppm.

**<sup>13</sup>C NMR** (151 MHz, CDCl<sub>3</sub>): δ = 150.9, 150.8, 140.8, 140.5, 140.1, 139.5, 134.0, 133.8, 130.1, 129.6, 129.4, 129.1, 129.0, 128.23, 128.19, 127.1, 126.8, 126.6, 125.4, 125.21, 125.20, 125.0, 124.7, 124.6, 124.1, 123.5, 123.40, 123.39, 123.2, 122.8, 122.6, 122.1, 121.9, 121.5, 121.2, 120.7, 120.6, 120.1, 117.5, 117.4, 115.6, 114.1, 112.2, 111.1 ppm.

**HRMS** (ESI) *m/z*: [M + H]<sup>+</sup> Calcd. for C<sub>22</sub>H<sub>15</sub>NOBr<sup>+</sup> 388.0332; Found 388.0332.

**IR (KBr)**: 3848, 3509, 3408, 3053, 2926, 2660, 2325, 2250, 2111, 1991, 1895, 1709, 1619, 1590, 1514, 1462, 1385, 1348, 1273, 1189, 1143, 1041, 946, 904, 860, 808, 735, 694 cm<sup>-1</sup>.

**1-(2,7-Dibromo-9H-carbazol-3-yl)naphthalen-2-ol (6d)**

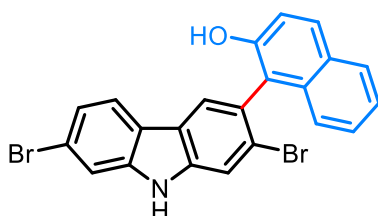

The title compound **6d** was synthesized according to the **GP-2** and isolated after silica gel column chromatography (*n*-pentane : diethyl ether – 20:1 → 2:1) as a colorless solid (66%, 61.4 mg).

**m.p.**: 242 – 248 °C.

**<sup>1</sup>H NMR** (600 MHz, CDCl<sub>3</sub>): δ = 8.24 (br, 1H), 8.04 (s, 1H), 7.91 (s, 1H), 7.89 (d, *J* = 8.9 Hz, 1H), 7.87 – 7.85 (m, 1H), 7.82 (d, *J* = 8.3 Hz, 1H), 7.64 (d, *J* = 0.7 Hz, 1H), 7.37 (dd, *J* = 8.4, 1.2 Hz, 1H), 7.35 – 7.33 (m, 2H), 7.32 (d, *J* = 8.9 Hz, 1H), 7.21 – 7.20 (m, 1H), 4.96 (s, 1H) ppm.

**<sup>13</sup>C NMR** (151 MHz, CDCl<sub>3</sub>): δ (ppm) 150.9, 140.8, 140.5, 133.8, 130.2, 129.0, 128.3, 126.8, 126.0, 124.64, 124.61, 123.9, 123.6, 123.5, 123.3, 121.9, 121.6, 121.0, 120.6, 117.5, 115.8, 114.2.

**HRMS** (APCI) *m/z*: [M + H]<sup>+</sup> Calcd. for C<sub>22</sub>H<sub>14</sub>NO<sup>79</sup>Br<sub>2</sub><sup>+</sup> 465.9437; Found 465.9437.

**IR (KBr)**: 3820, 3472, 3361, 3053, 2925, 2659, 2325, 2166, 2070, 1994, 1914, 1854, 1760, 1674, 1599, 1508, 1457, 1419, 1394, 1334, 1267, 1236, 1113, 1033, 985, 948, 888, 836, 796, 755, 723, 674 cm<sup>-1</sup>.

### 1-(9-(4-Methoxyphenyl)-9H-carbazol-3-yl)naphthalen-2-ol (6e)

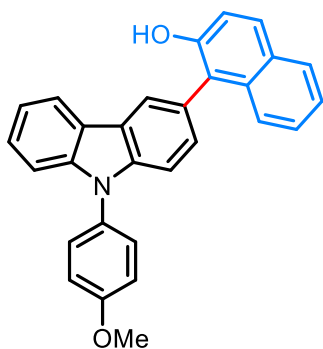

The title compound **6e** was synthesized according to the **GP-2** and isolated after silica gel column chromatography (*n*-pentane : diethyl ether – 20:1 → 2:1) as a colorless solid (76%, 63.0 mg).

**m.p.:** 177 – 180 °C.

**<sup>1</sup>H NMR** (400 MHz, CDCl<sub>3</sub>): δ = 8.16 (s, 1H), 8.07 (d, *J* = 7.7 Hz, 1H), 7.80 (d, *J* = 8.4 Hz, 2H), 7.50 – 7.46 (m, 4H), 7.44 – 7.35 (m, 3H), 7.32 – 7.24 (m, 4H), 7.11 (d, *J* = 8.8 Hz, 2H), 5.34 (s, 1H), 3.89 (s, 3H) ppm.

**<sup>13</sup>C NMR** (101 MHz, CDCl<sub>3</sub>): δ = 159.2, 150.7, 141.9, 141.3, 134.0, 130.1, 129.3, 129.0, 128.8, 128.6, 128.1, 126.5, 126.4, 125.0, 124.8, 124.2, 123.2, 123.0, 122.8, 121.7, 120.5, 120.2, 117.3, 115.3, 111.0, 110.1, 55.67 ppm.

**HRMS** (ESI) *m/z*: [M + Na]<sup>+</sup> Calcd. for C<sub>29</sub>H<sub>21</sub>NO<sub>2</sub>Na<sup>+</sup> 438.1465; Found 438.1473.

**IR** (KBr): 3521, 3054, 2958, 2837, 2250, 2052, 1895, 1730, 1619, 1596, 1511, 1459, 1386, 1326, 1291, 1240, 1178, 1144, 1030, 944, 906, 816, 729, 679 cm<sup>-1</sup>.

### 1-(9-(4-Chlorophenyl)-9H-carbazol-3-yl)naphthalen-2-ol (6f)

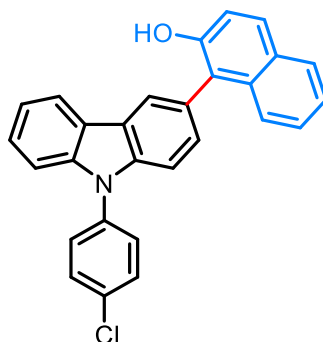

The title compound **6f** was synthesized according to the **GP-2** and isolated after silica gel column chromatography (*n*-pentane : diethyl ether – 20:1 → 2:1) as a colorless solid (64%, 54.0 mg).

**m.p.:** 165 – 169 °C.

**<sup>1</sup>H NMR** (600 MHz, CDCl<sub>3</sub>): δ = 8.22 (s, 1H), 8.13 (d, *J* = 7.7 Hz, 1H), 7.86 (d, *J* = 8.7 Hz, 2H), 7.64 (d, *J* = 8.5 Hz, 2H), 7.60 – 7.58 (m, 3H), 7.51 – 7.44 (m, 4H), 7.36 – 7.34 (m, 4H), 5.35 (s, 1H) ppm.

**<sup>13</sup>C NMR** (151 MHz, CDCl<sub>3</sub>): δ = 150.8, 141.3, 140.8, 136.2, 134.1, 133.6, 130.4, 129.5, 129.14, 129.11, 128.6, 128.2, 126.9, 126.6, 125.6, 125.0, 124.7, 123.4, 123.24, 123.22, 121.6, 120.8, 120.7, 117.4, 111.0, 110.0 ppm.

**HRMS** (APCI) *m/z*: [M + H]<sup>+</sup> Calcd. for C<sub>28</sub>H<sub>19</sub>NOCl<sup>+</sup> 420.1150; Found 420.1149.

**IR (KBr):** 3523, 3057, 2925, 2663, 2251, 2178, 2078, 1901, 1729, 1619, 1595, 1493, 1457, 1386, 1324, 1268, 1229, 1172, 1143, 1091, 1015, 941, 905, 815, 729  $\text{cm}^{-1}$ .

### 3-(3-(2-Hydroxynaphthalen-1-yl)-9H-carbazol-9-yl)benzonitrile (**6g**)

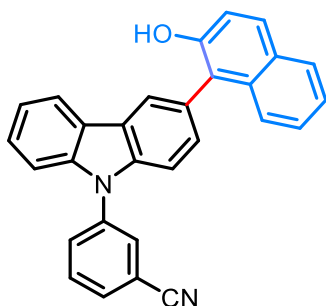

The title compound **6g** was synthesized according to the **GP-2** and isolated after silica gel column chromatography (*n*-pentane : diethyl ether – 20:1 → 2:1) as a colorless solid (62%, 50.8 mg).

**m.p.:** 212 – 219 °C.

**<sup>1</sup>H NMR** (600 MHz,  $\text{CDCl}_3$ ):  $\delta$  = 8.22 (s, 1H), 8.13 (d,  $J$  = 7.9 Hz, 1H), 7.97 (s, 1H), 7.93 (d,  $J$  = 7.2 Hz, 1H), 7.86 (d,  $J$  = 8.9 Hz, 2H), 7.81 – 7.77 (m, 2H), 7.59 (d,  $J$  = 8.3 Hz, 1H), 7.51 – 7.47 (m, 3H), 7.44 (d,  $J$  = 8.3 Hz, 1H), 7.38 – 7.33 (m, 4H), 5.31 (s, 1H) ppm.

**<sup>13</sup>C NMR** (151 MHz,  $\text{CDCl}_3$ ):  $\delta$  (ppm) 150.8, 140.9, 140.3, 138.8, 134.0, 131.7, 131.3, 131.2, 130.5, 129.6, 129.4, 129.1, 128.2, 127.1, 126.6, 126.3, 125.0, 124.9, 123.5, 123.4, 121.4, 121.0, 117.5, 114.6, 110.7, 109.7.

**HRMS** (APCI)  $m/z$ :  $[\text{M} + \text{H}]^+$  Calcd. for  $\text{C}_{29}\text{H}_{19}\text{NO}^+$  411.1492; Found 411.1483.

**IR (KBr):** 3521, 3382, 3055, 2925, 2681, 2323, 2242, 2166, 2107, 1990, 1897, 1767, 1595, 1486, 1456, 1386, 1323, 1268, 1223, 1168, 1144, 1026, 983, 950, 916, 889, 856, 813, 741, 692  $\text{cm}^{-1}$ .

### 1-(6-Bromo-9-methyl-9H-carbazol-3-yl)naphthalen-2-ol (**6h**)

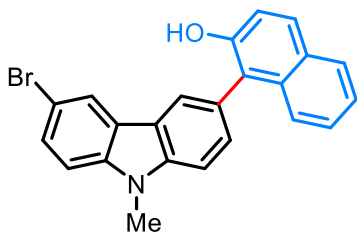

The title compound **6h** was synthesized according to the **GP-2** and isolated after silica gel column chromatography (*n*-pentane : diethyl ether – 20:1 → 2:1) as a colorless solid (73%, 59.0 mg).

**m.p.:** 189 – 191 °C.

**<sup>1</sup>H NMR** (600 MHz,  $\text{CDCl}_3$ ):  $\delta$  = 8.18 (d,  $J$  = 1.5 Hz, 1H), 8.11 (s, 1H), 7.85 (d,  $J$  = 8.4 Hz, 2H), 7.62 – 7.60 (m, 2H), 7.53 (d,  $J$  = 8.3 Hz, 1H), 7.43 (d,  $J$  = 8.9 Hz, 1H), 7.35 – 7.31 (m, 4H), 5.27 (s, 1H), 3.93 (s, 3H) ppm.

**<sup>13</sup>C NMR** (151 MHz,  $\text{CDCl}_3$ ):  $\delta$  = 150.7, 141.2, 140.1, 133.9, 129.4, 129.3, 129.0, 128.1, 126.5, 124.8, 124.5, 124.1, 123.32, 123.25, 123.23, 122.8, 121.4, 117.3, 112.2, 110.2, 110.0, 29.4 ppm.

**HRMS** (ESI)  $m/z$ :  $[\text{M} + \text{Na}]^+$  Calcd. for  $\text{C}_{23}\text{H}_{16}\text{NOBrNa}^+$  424.0308; Found 424.0319.

**IR (KBr):** 3626, 3515, 3055, 2930, 2826, 2325, 2078, 1884, 1727, 1618, 1594, 1509, 1483, 1384, 1350, 1282, 1243, 1205, 1168, 1142, 1049, 1021, 987, 949, 903, 863, 807, 730, 671  $\text{cm}^{-1}$ .

**1-(9-Butyl-9H-carbazol-3-yl)naphthalen-2-ol (6i)**

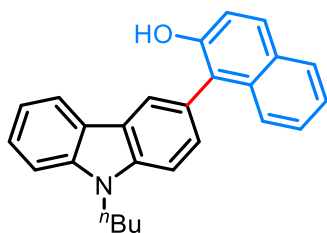

The title compound **6i** was synthesized according to the **GP-2** and isolated after silica gel column chromatography (*n*-pentane : diethyl ether – 20:1 → 2:1) as a colorless solid (80%, 58.6 mg).

**m.p.:** 155 – 158 °C.

**<sup>1</sup>H NMR** (600 MHz,  $\text{CDCl}_3$ ):  $\delta$  = 8.15 (s, 1H), 8.06 (d,  $J$  = 7.7 Hz, 1H), 7.83 (d,  $J$  = 8.7 Hz, 2H), 7.60 (d,  $J$  = 8.3 Hz, 1H), 7.52 – 7.47 (m, 4H), 7.34 – 7.30 (m, 3H), 7.24 (d,  $J$  = 8.0 Hz, 1H), 5.35 (s, 1H), 4.38 (t,  $J$  = 7.2 Hz, 2H), 1.96 – 1.91 (m, 2H), 1.51 – 1.45 (m, 2H), 1.01 (t,  $J$  = 7.4 Hz, 3H) ppm.

**<sup>13</sup>C NMR** (151 MHz,  $\text{CDCl}_3$ ):  $\delta$  = 150.7, 140.9, 140.4, 134.1, 129.2, 129.0, 128.5, 128.0, 126.4, 126.3, 125.0, 123.9, 123.7, 123.2, 123.1, 122.5, 121.8, 120.6, 119.3, 117.3, 109.9, 109.0, 43.1, 31.3, 20.7, 14.0 ppm.

**HRMS (ESI)  $m/z$ :**  $[\text{M} + \text{H}]^+$  Calcd. for  $\text{C}_{26}\text{H}_{24}\text{NO}^+$  366.1852; Found 366.1856.

**IR (KBr):** 3869, 3517, 3053, 2956, 2930, 2869, 2323, 2067, 1994, 1890, 1767, 1618, 1596, 1464, 1385, 1340, 1268, 1244, 1207, 1168, 1143, 1068, 1023, 985, 949, 892, 813, 777, 745, 666  $\text{cm}^{-1}$ .

**Ethyl 2-(3-(2-hydroxynaphthalen-1-yl)-9H-carbazol-9-yl)acetate (6j)**

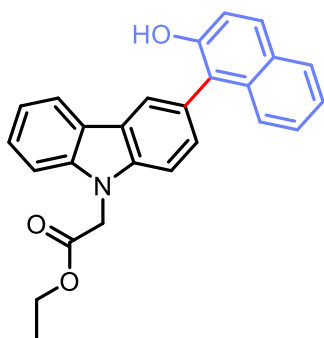

The title compound **6j** was synthesized according to the **GP-2** and isolated after silica gel column chromatography (*n*-pentane : diethyl ether – 20:1 → 2:1) as a colorless solid (70%, 55.1 mg).

**m.p.:** 142 – 147 °C.

**<sup>1</sup>H NMR** (600 MHz,  $\text{CDCl}_3$ ):  $\delta$  = 8.18 (s, 1H), 8.09 (d,  $J$  = 7.7 Hz, 1H), 7.86 (d,  $J$  = 8.4 Hz, 2H), 7.55 (t,  $J$  = 8.1 Hz, 2H), 7.52 – 7.48 (m, 2H), 7.42 (d,  $J$  = 8.2 Hz, 1H), 7.35 – 7.34 (m, 3H), 7.31 (t,  $J$  = 7.5 Hz, 1H), 5.38 (s, 1H), 5.09 (s, 2H), 4.29 (q,  $J$  = 7.1 Hz, 2H), 1.32 (t,  $J$  = 7.1 Hz, 3H) ppm.

**<sup>13</sup>C NMR** (151 MHz,  $\text{CDCl}_3$ ):  $\delta$  = 168.5, 150.9, 141.1, 140.6, 134.1, 129.4, 129.1, 129.0, 128.1, 126.7, 126.5, 125.1, 124.9, 124.5, 123.3, 123.0, 121.7, 120.9, 120.3, 117.4, 109.8, 108.8, 62.0, 45.0, 14.3 ppm.

**HRMS (ESI)  $m/z$ :**  $[\text{M} + \text{Na}]^+$  Calcd. for  $\text{C}_{26}\text{H}_{21}\text{NO}_3\text{Na}^+$  418.1414; Found 418.1414.

**IR (KBr):** 3518, 3054, 2982, 2932, 2251, 2035, 1894, 1736, 1597, 1465, 1429, 1383, 1344, 1268, 1197, 1072, 1023, 948, 907, 814, 730, 670  $\text{cm}^{-1}$ .

**1-(9-Allyl-9H-carbazol-3-yl)naphthalen-2-ol (6k)**

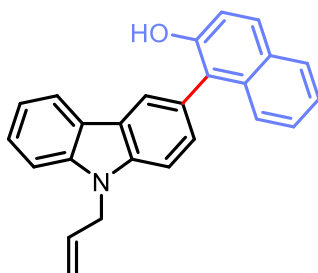

The title compound **6k** was synthesized according to the **GP-2** and isolated after silica gel column chromatography (*n*-pentane : diethyl ether – 20:1 → 4:1) as a colorless solid (69%, 48 mg).

**m.p.:** 136 – 138 °C.

**<sup>1</sup>H NMR** (600 MHz,  $\text{CDCl}_3$ ):  $\delta$  = 8.20 (s, 1H), 8.10 (d,  $J$  = 7.7 Hz, 1H), 7.87 (d,  $J$  = 8.6 Hz, 2H), 7.60 (d,  $J$  = 8.2 Hz, 1H), 7.55 – 7.50 (m, 3H), 7.48 (d,  $J$  = 8.2 Hz, 1H), 7.37 – 7.35 (m, 3H), 7.30 (t,  $J$  = 7.4 Hz, 1H), 6.12 – 6.06 (m, 1H), 5.39 (s, 1H), 5.28 (d,  $J$  = 10.3 Hz, 1H), 5.19 (d,  $J$  = 17.1 Hz, 1H), 5.01 (d,  $J$  = 4.3 Hz, 2H) ppm.

**<sup>13</sup>C NMR** (151 MHz,  $\text{CDCl}_3$ ):  $\delta$  = 150.9, 141.0, 140.4, 134.2, 132.3, 129.4, 129.1, 128.7, 128.1, 126.5, 125.1, 124.2, 124.1, 123.3, 123.2, 122.7, 121.8, 120.7, 119.7, 117.4, 117.3, 110.1, 109.2, 45.6 ppm.

**HRMS** (ESI)  $m/z$ :  $[\text{M} + \text{Na}]^+$  Calcd. for  $\text{C}_{25}\text{H}_{19}\text{NONa}^+$  372.1359; Found 372.1370.

**IR (KBr):** 3518, 3055, 2921, 2859, 2326, 2076, 1892, 1728, 1618, 1596, 1464, 1385, 1330, 1269, 1209, 1168, 1143, 1028, 986, 907, 812, 731  $\text{cm}^{-1}$ .

**1-(9H-Carbazol-3-yl)-6-methoxynaphthalen-2-ol (6l)**

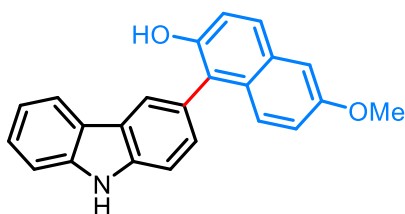

The title compound **6l** was synthesized according to the **GP-2** and isolated after silica gel column chromatography (*n*-pentane : diethyl ether – 20:1 → 2:1) as a colorless solid (74%, 50.2 mg).

**m.p.:** 172 – 178 °C.

**<sup>1</sup>H NMR** (600 MHz,  $\text{CDCl}_3$ ):  $\delta$  = 8.23 (br, 1H), 8.13 (s, 1H), 8.05 (d,  $J$  = 7.8 Hz, 1H), 7.73 (d,  $J$  = 8.9 Hz, 1H), 7.62 (d,  $J$  = 8.2 Hz, 1H), 7.51 – 7.46 (d,  $J$  = 27.8 Hz, 2H), 7.43 (d,  $J$  = 8.2 Hz, 1H), 7.38 (d,  $J$  = 9.2 Hz, 1H), 7.30 (d,  $J$  = 8.9 Hz, 1H), 7.28 – 7.26 (m, 1H), 7.18 (d,  $J$  = 2.5 Hz, 1H), 7.01 (dd,  $J$  = 9.2, 2.5 Hz, 1H), 5.18 (s, 1H), 3.92 (s, 3H) ppm.

**<sup>13</sup>C NMR** (151 MHz,  $\text{CDCl}_3$ ):  $\delta$  (ppm) 156.0, 149.2, 140.0, 139.5, 130.0, 129.4, 128.8, 128.0, 126.7, 126.6, 124.8, 124.6, 123.1, 122.1, 120.7, 120.1, 119.0, 117.8, 111.9, 111.0, 106.5, 55.5.

**HRMS** (ESI)  $m/z$ :  $[\text{M} + \text{H}]^+$  Calcd. for  $\text{C}_{23}\text{H}_{18}\text{NO}_2^+$  340.1332; Found 340.1349.

**IR (KBr):** 3848, 3525, 3411, 3047, 2999, 2924, 2847, 2659, 2324, 2080, 1902, 1780, 1711, 1670, 1596, 1513, 1458, 1422, 1370, 1339, 1306, 1268, 1232, 1163, 1033, 949, 903, 850, 819, 732, 675  $\text{cm}^{-1}$ .

### 1-(9H-Carbazol-3-yl)-7-methoxynaphthalen-2-ol (6m)

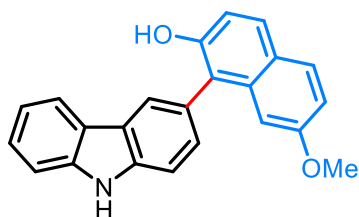

The title compound **6m** was synthesized according to the **GP-2** and isolated after silica gel column chromatography (*n*-pentane : diethyl ether – 20:1 → 2:1) as a colorless solid (72%, 48.9 mg).

**m.p.:** 136 – 142 °C.

**<sup>1</sup>H NMR** (600 MHz,  $\text{CDCl}_3$ ):  $\delta$  = 8.23 (br, 1H), 8.15 (s, 1H), 8.07 (d,  $J$  = 7.8 Hz, 1H), 7.77 – 7.74 (m, 2H), 7.63 (d,  $J$  = 8.2 Hz, 1H), 7.51 – 7.47 (m, 2H), 7.45 (d,  $J$  = 8.2 Hz, 1H), 7.28 (t,  $J$  = 7.5 Hz, 1H), 7.18 (d,  $J$  = 8.8 Hz, 1H), 7.01 (dd,  $J$  = 8.9, 2.4 Hz, 1H), 6.77 (d,  $J$  = 2.3 Hz, 1H), 5.29 (s, 1H), 3.63 (s, 3H) ppm.

**<sup>13</sup>C NMR** (151 MHz,  $\text{CDCl}_3$ ):  $\delta$  = 158.4, 151.4, 140.0, 139.5, 135.4, 129.7, 129.2, 128.8, 126.6, 124.9, 124.7, 124.5, 123.1, 123.0, 121.1, 120.7, 120.1, 115.5, 114.9, 112.1, 111.0, 104.1, 55.2 ppm.

**HRMS** (ESI)  $m/z$ :  $[\text{M} + \text{Na}]^+$  Calcd. for  $\text{C}_{23}\text{H}_{17}\text{NO}_2\text{Na}^+$  362.1152; Found 362.1149.

**IR (KBr):** 3855, 3509, 3408, 3055, 2930, 2834, 2668, 2251, 2077, 1895, 1732, 1618, 1511, 1491, 1459, 1376, 1332, 1267, 1221, 1157, 1032, 1003, 904, 829, 798, 728  $\text{cm}^{-1}$ .

### 7-Bromo-1-(9H-carbazol-3-yl)naphthalen-2-ol (6n)

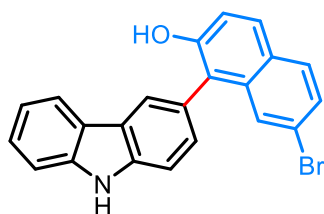

The title compound **6n** was synthesized according to the **GP-2** and isolated after silica gel column chromatography (*n*-pentane : diethyl ether – 20:1 → 2:1) as a colorless solid (67%, 52.0 mg).

**m.p.:** 178 – 180 °C.

**<sup>1</sup>H NMR** (600 MHz,  $\text{CDCl}_3$ ):  $\delta$  = 8.26 (br, 1H), 8.11 (s, 1H), 8.07 (d,  $J$  = 7.8 Hz, 1H), 7.80 (d,  $J$  = 8.9 Hz, 1H), 7.70 (d,  $J$  = 8.7 Hz, 1H), 7.66 (d,  $J$  = 8.2 Hz, 1H), 7.59 (s, 1H), 7.53 – 7.48 (m, 2H), 7.41 (d,  $J$  = 8.3 Hz, 2H), 7.32 (d,  $J$  = 8.9 Hz, 1H), 7.28 (t,  $J$  = 7.3 Hz, 1H), 5.36 (s, 1H) ppm.

**<sup>13</sup>C NMR** (151 MHz,  $\text{CDCl}_3$ ):  $\delta$  = 151.7, 140.0, 139.6, 135.5, 129.8, 129.4, 128.7, 127.5, 127.2, 126.8, 126.7, 124.7, 123.8, 123.1, 123.0, 121.2, 121.1, 120.8, 120.2, 117.8, 112.2, 111.1 ppm.

**HRMS** (APCI)  $m/z$ :  $[\text{M}]^+$  Calcd. for  $\text{C}_{22}\text{H}_{14}\text{NOBr}^+$  387.0253; Found 387.0241.

**IR (KBr):** 3850, 3503, 3412, 3054, 2923, 2665, 2326, 2111, 1892, 1710, 1609, 1494, 1445, 1359, 1330, 1239, 1198, 1161, 1067, 1043, 960, 903, 830, 728  $\text{cm}^{-1}$ .



### 6-Bromo-1-(9*H*-carbazol-3-yl)naphthalen-2-ol (**6o**)

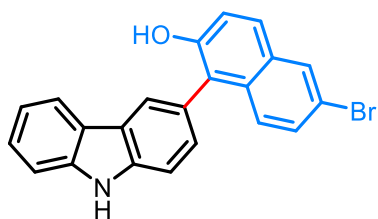

The title compound **6o** was synthesized according to the **GP-2** and isolated after silica gel column chromatography (*n*-pentane : diethyl ether – 20:1 → 2:1) as a colorless solid (73%, 56.6 mg).

**m.p.:** 189 – 195 °C.

**<sup>1</sup>H NMR** (400 MHz, CDCl<sub>3</sub>): δ = 8.12 (br, 1H), 8.00 (s, 1H), 7.95 (d, *J* = 7.8 Hz, 1H), 7.89 (d, *J* = 1.3 Hz, 1H), 7.64 (d, *J* = 8.9 Hz, 1H), 7.51 (d, *J* = 8.2 Hz, 1H), 7.40 – 7.39 (m, 2H), 7.31 – 7.23 (m, 4H), 7.20 – 7.16 (m, 1H), 5.27 (s, 1H) ppm.

**<sup>13</sup>C NMR** (101 MHz, CDCl<sub>3</sub>): δ = 151.0, 139.9, 139.4, 132.6, 130.1, 129.9, 129.6, 128.5, 128.3, 126.9, 126.7, 124.5, 123.9, 122.9, 122.8, 121.9, 120.6, 120.1, 118.4, 117.0, 112.0, 110.9 ppm.

**HRMS** (ESI) *m/z*: [M + H]<sup>+</sup> Calcd. for C<sub>22</sub>H<sub>15</sub>NOBr<sup>+</sup> 388.0332; Found 388.0317.

**IR (KBr):** 3848, 3526, 3410, 3044, 2925, 2663, 2326, 2088, 1992, 1898, 1715, 1587, 1496, 1459, 1359, 1334, 1303, 1264, 1240, 1200, 1161, 1140, 1066, 942, 879, 849, 813, 732, 669 cm<sup>-1</sup>.

### 3-Bromo-1-(9*H*-carbazol-3-yl)naphthalen-2-ol (**6p**)

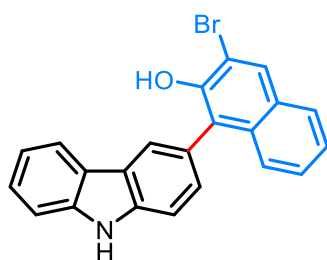

The title compound **6p** was synthesized according to the **GP-2** and isolated after silica gel column chromatography (*n*-pentane : diethyl ether – 20:1 → 2:1) as a colorless solid (70%, 54.0 mg).

**m.p.:** 223 – 229 °C.

**<sup>1</sup>H NMR** (600 MHz, CDCl<sub>3</sub>): δ = 8.21 (br, 1H), 8.13 (d, *J* = 8.7 Hz, 2H), 8.05 (d, *J* = 7.8 Hz, 1H), 7.77 (d, *J* = 8.0 Hz, 1H), 7.62 (d, *J* = 8.2 Hz, 1H), 7.50 – 7.42 (m, 4H), 7.38 – 7.33 (m, 2H), 7.28 – 7.26 (m, 1H), 5.69 (s, 1H) ppm.

**<sup>13</sup>C NMR** (151 MHz, CDCl<sub>3</sub>): δ = 147.2, 140.0, 139.5, 133.5, 131.5, 129.7, 128.5, 127.2, 126.8, 126.6, 125.5, 124.8, 124.39, 124.36, 123.6, 123.1, 122.9, 120.7, 120.1, 111.8, 111.7, 111.0 ppm.

**HRMS** (ESI) *m/z*: [M + Na]<sup>+</sup> Calcd. for C<sub>22</sub>H<sub>14</sub>NOBrNa<sup>+</sup> 410.0151; Found 410.0151.

**IR (KBr):** 3847, 3511, 3415, 3052, 2922, 2853, 2665, 2326, 2111, 1897, 1767, 1602, 1579, 1497, 1451, 1376, 1331, 1265, 1239, 1202, 1142, 1005, 949, 882, 821, 739 cm<sup>-1</sup>.

### 5-(9H-Carbazol-3-yl)-6-hydroxynaphthalen-2-yl acetate (6q)

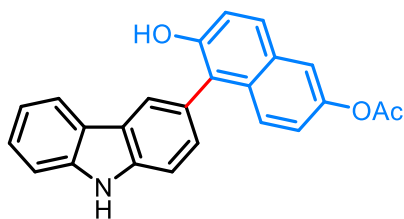

The title compound **6q** was synthesized according to the **GP-2** and isolated after silica gel column chromatography (*n*-pentane : diethyl ether – 20:1 → 2:1) as a colorless solid (58%, 42.5 mg).

**m.p.:** 121 – 126 °C.

**<sup>1</sup>H NMR** (600 MHz, CDCl<sub>3</sub>): δ = 8.28 (br, 1H), 8.10 (s, 1H), 8.05 (d, *J* = 7.8 Hz, 1H), 7.78 (d, *J* = 8.9 Hz, 1H), 7.57 – 7.56 (m, 2H), 7.47 – 7.46 (m, 3H), 7.38 (dd, *J* = 8.2, 1.6 Hz, 1H), 7.33 (d, *J* = 8.9 Hz, 1H), 7.28 – 7.25 (m, 1H), 7.07 (dd, *J* = 9.1, 2.4 Hz, 1H), 5.33 (s, 1H), 2.35 (s, 3H) ppm.

**<sup>13</sup>C NMR** (151 MHz, CDCl<sub>3</sub>): δ = 170.2, 150.8, 146.6, 140.0, 139.5, 132.3, 129.2, 128.9, 128.7, 126.7, 126.6, 124.5, 124.3, 123.1, 123.0, 122.1, 121.5, 120.7, 120.1, 118.8, 118.3, 112.0, 111.0, 21.3 ppm.

**HRMS** (ESI) *m/z*: [M + Na]<sup>+</sup> Calcd. for C<sub>24</sub>H<sub>17</sub>NO<sub>3</sub>Na<sup>+</sup> 390.1101; Found 390.1088.

**IR** (KBr): 3511, 3406, 3056, 2929, 2251, 2110, 1899, 1742, 1602, 1513, 1492, 1418, 1335, 1203, 1146, 1044, 1013. 960, 904, 814, 728, 671 cm<sup>-1</sup>.

### 10-(9H-Carbazol-3-yl)phenanthren-9-ol (6r)

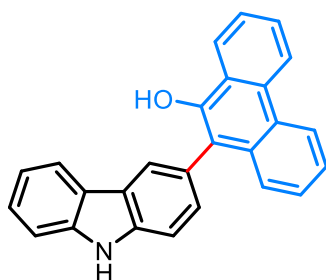

The title compound **6r** was synthesized according to the **GP-2** and isolated after silica gel column chromatography (*n*-pentane : diethyl ether – 20:1 → 2:1) as a colorless solid (52%, 37.5 mg).

**m.p.:** 210 – 218 °C.

**<sup>1</sup>H NMR** (600 MHz, CDCl<sub>3</sub>): δ = 8.77 (d, *J* = 8.2 Hz, 1H), 8.73 (d, *J* = 8.2 Hz, 1H), 8.45 (dd, *J* = 8.0, 0.9 Hz, 1H), 8.20 (s, 2H), 8.06 (d, *J* = 7.8 Hz, 1H), 7.75 (t, *J* = 7.6 Hz, 1H), 7.71 (t, *J* = 7.5 Hz, 1H), 7.63 (d, *J* = 8.1 Hz, 1H), 7.53 (t, *J* = 7.5 Hz, 1H), 7.49 – 7.48 (m, 4H), 7.43 (t, *J* = 8.0 Hz, 1H), 7.29 – 7.27 (m, 1H), 5.69 (s, 1H) ppm.

**<sup>13</sup>C NMR** (151 MHz, CDCl<sub>3</sub>): δ = 146.7, 140.0, 139.5, 133.4, 131.1, 129.1, 127.3, 126.9, 126.8, 126.6, 126.5, 125.8, 125.2, 124.9, 124.7, 124.0, 123.4, 123.2, 123.1, 122.7, 120.7, 120.1, 112.1, 111.0 ppm.

**HRMS** (APCI) *m/z*: [M + H]<sup>+</sup> Calcd. for C<sub>26</sub>H<sub>18</sub>NO<sup>+</sup> 360.1383; Found 360.1392.

**IR** (KBr): 3515, 3416, 3064, 2925, 2329, 2248, 2122, 1685, 1600, 1491, 1448, 1400, 1338, 1295, 1238, 1211, 1154, 1131, 1108, 1065, 1041, 948, 904, 811, 726 cm<sup>-1</sup>.

### 1-(9*H*-Carbazol-9-yl)naphthalen-2-ol (**7a**)

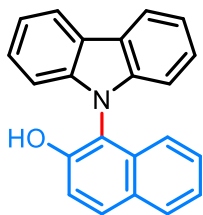

The title compound **7a** was synthesized according to the **GP-3** and isolated after silica gel column chromatography (*n*-pentane : diethyl ether – 20:1 → 4:1) as a colorless solid (91%, 56.5 mg).

**m.p.:** 130 – 133 °C.

**<sup>1</sup>H NMR** (600 MHz, CDCl<sub>3</sub>): δ = 8.26 (d, *J* = 7.4 Hz, 2H), 8.03 (d, *J* = 9.0 Hz, 1H), 7.95 (d, *J* = 8.1 Hz, 1H), 7.49 (d, *J* = 9.0 Hz, 1H), 7.42 – 7.37 (m, 5H), 7.26 (t, *J* = 7.7 Hz, 1H), 7.02 (d, *J* = 7.6 Hz, 2H), 6.85 (d, *J* = 8.4 Hz, 1H), 5.35 (s, 1H) ppm.

**<sup>13</sup>C NMR** (151 MHz, CDCl<sub>3</sub>): δ = 151.7, 141.2, 131.9, 131.1, 129.8, 128.5, 127.7, 126.6, 124.3, 123.9, 122.0, 120.7, 120.6, 117.9, 115.3, 110.4 ppm.

**HRMS** (APCI) *m/z*: [M]<sup>+</sup> Calcd. for C<sub>22</sub>H<sub>15</sub>NO<sup>+</sup> 309.1148; Found 309.1146.

**IR (KBr)**: 3480, 3055, 2926, 2673, 2320, 2111, 1898, 1775, 1701, 1623, 1599, 1514, 1475, 1447, 1402, 1337, 1311, 1264, 1226, 1193, 1138, 1068, 1020, 970, 927, 859, 816, 744 cm<sup>-1</sup>.

### 1-(3-Fluoro-9*H*-carbazol-9-yl)naphthalen-2-ol (**7b**)

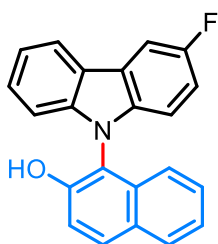

The title compound **7b** was synthesized according to the **GP-3** and isolated after silica gel column chromatography (*n*-pentane : diethyl ether – 20:1 → 4:1) as a colorless solid (81%, 53.3 mg).

**m.p.:** 115 – 117 °C.

**<sup>1</sup>H NMR** (400 MHz, CDCl<sub>3</sub>): δ = 8.08 (d, *J* = 7.8 Hz, 1H), 7.91 (d, *J* = 9.0 Hz, 1H), 7.83 (d, *J* = 8.1 Hz, 1H), 7.78 (dd, *J* = 8.8, 2.4 Hz, 1H), 7.36 (d, *J* = 9.0 Hz, 1H), 7.31 – 7.22 (m, 3H), 7.17 – 7.13 (m, 1H), 7.01 (td, *J* = 9.0, 2.5 Hz, 1H), 6.88 (d, *J* = 7.9 Hz, 1H), 6.80 (dd, *J* = 8.8, 4.2 Hz, 1H), 6.66 (d, *J* = 8.4 Hz, 1H), 5.21 (s, 1H) ppm.

**<sup>13</sup>C NMR** (101 MHz, CDCl<sub>3</sub>): δ = 158.4 (d, *J* = 237.4 Hz), 151.8, 142.1, 137.5, 131.8, 131.3, 129.8, 128.6, 127.8, 127.2, 124.5, 124.4, 123.5 (d, *J* = 4.1 Hz), 121.8, 120.9, 120.7, 117.9, 115.1, 114.3 (d, *J* = 25.5 Hz), 111.1 (d, *J* = 9.1 Hz), 110.7, 106.6 (d, *J* = 24.1 Hz) ppm.

**<sup>19</sup>F NMR** (565 MHz, Chloroform-*d*): δ = -122.91 – -122.94 (m) ppm.

**HRMS** (APCI) *m/z*: [M + H]<sup>+</sup> Calcd. for C<sub>22</sub>H<sub>15</sub>NOF<sup>+</sup> 328.1132; Found 328.1124.

**IR (KBr)**: 3487, 3060, 2671, 2326, 2083, 1902, 1711, 1626, 1600, 1516, 1479, 1453, 1402, 1339, 1270, 1193, 1167, 1141, 1042, 972, 908, 866, 809, 734 cm<sup>-1</sup>.

### 1-(3-Ethyl-9H-carbazol-9-yl)naphthalen-2-ol (7c)

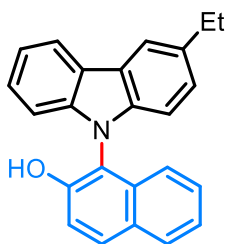

The title compound **7c** was synthesized according to the **GP-3** and isolated after silica gel column chromatography (*n*-pentane : diethyl ether – 20:1 → 4:1) as a colorless solid (90%, 60.8 mg).

**m.p.:** 138 – 144 °C.

**<sup>1</sup>H NMR** (400 MHz, CDCl<sub>3</sub>): δ = 8.12 – 8.10 (m, 1H), 7.95 (s, 1H), 7.88 (d, *J* = 9.0 Hz, 1H), 7.81 (d, *J* = 8.1 Hz, 1H), 7.34 (d, *J* = 9.0 Hz, 1H), 7.27 – 7.21 (m, 3H), 7.15 – 7.10 (m, 2H), 6.86 – 6.84 (m, 1H), 6.79 (d, *J* = 8.3 Hz, 1H), 6.71 (d, *J* = 8.4 Hz, 1H), 5.21 (s, 1H), 2.77 (q, *J* = 7.6 Hz, 2H), 1.28 (t, *J* = 7.6 Hz, 3H) ppm.

**<sup>13</sup>C NMR** (101 MHz, CDCl<sub>3</sub>): δ = 151.8, 141.5, 139.7, 136.9, 131.9, 131.0, 129.8, 128.5, 127.6, 126.9, 126.4, 124.2, 124.0, 123.9, 122.1, 120.6, 120.5, 119.5, 117.9, 115.5, 110.4, 110.2, 29.1, 16.6 ppm.

**HRMS** (ESI) *m/z*: [M + Na]<sup>+</sup> Calcd. for C<sub>24</sub>H<sub>19</sub>NONa<sup>+</sup> 360.1359; Found 360.1372.

**IR** (KBr): 3477, 3055, 2962, 2928, 2867, 2670, 2249, 2051, 1893, 1717, 1625, 1601, 1480, 1456, 1402, 1334, 1263, 1229, 1200, 1139, 1046, 971, 908, 882, 813, 772, 741, 664 cm<sup>-1</sup>.

### 1-(2-Chloro-9H-carbazol-9-yl)naphthalen-2-ol (7d)

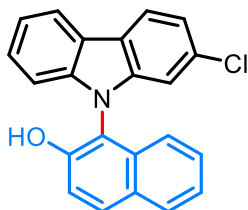

The title compound **7d** was synthesized according to the **GP-3** and isolated after silica gel column chromatography (*n*-pentane : diethyl ether – 20:1 → 4:1) as a colorless solid (83%, 57.1 mg).

**m.p.:** 114 – 117 °C.

**<sup>1</sup>H NMR** (600 MHz, CDCl<sub>3</sub>): δ = 8.17 (d, *J* = 7.5 Hz, 1H), 8.11 (d, *J* = 8.3 Hz, 1H), 8.01 (d, *J* = 9.0 Hz, 1H), 7.93 (d, *J* = 8.2 Hz, 1H), 7.44 (d, *J* = 9.0 Hz, 1H), 7.39 – 7.34 (m, 3H), 7.31 (d, *J* = 8.3 Hz, 1H), 7.27 – 7.24 (m, 1H), 6.97 – 6.96 (m, 2H), 6.77 (d, *J* = 8.5 Hz, 1H), 5.24 (s, 1H) ppm.

**<sup>13</sup>C NMR** (151 MHz, CDCl<sub>3</sub>): δ = 151.6, 141.8, 141.5, 132.4, 131.6, 131.3, 129.7, 128.5, 127.8, 126.8, 124.3, 123.2, 122.4, 121.6, 121.4, 121.3, 121.1, 120.5, 117.8, 114.5, 110.43, 110.38 ppm.

**HRMS** (ESI) *m/z*: [M + H]<sup>+</sup> Calcd. for C<sub>22</sub>H<sub>15</sub>NOCl<sup>+</sup> 344.0837; Found 344.0844.

**IR** (KBr): 3485, 3410, 3061, 2970, 2920, 2859, 2669, 2250, 2099, 1899, 1708, 1624, 1596, 1434, 1401, 1333, 1270, 1227, 1194, 1139, 1068, 973, 941, 907, 849, 814, 730 cm<sup>-1</sup>.

### 1-(3,6-Dichloro-9*H*-carbazol-9-yl)naphthalen-2-ol (7e)

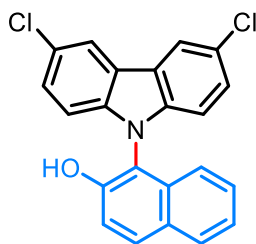

The title compound **7e** was synthesized according to the **GP-3** and isolated after silica gel column chromatography (*n*-pentane : diethyl ether – 20:1 → 4:1) as a colorless solid (82%, 62.2 mg).

**m.p.:** 130 – 134 °C.

**<sup>1</sup>H NMR** (400 MHz, CDCl<sub>3</sub>): δ = 8.00 (d, *J* = 1.9 Hz, 2H), 7.87 (d, *J* = 9.0 Hz, 1H), 7.79 (d, *J* = 8.1 Hz, 1H), 7.29 (d, *J* = 9.0 Hz, 1H), 7.25 (t, *J* = 7.5 Hz, 1H), 7.21 (d, *J* = 1.9 Hz, 1H), 7.19 (d, *J* = 1.9 Hz, 1H), 7.12 (t, *J* = 7.6 Hz, 1H), 6.76 (d, *J* = 8.7 Hz, 2H), 6.58 (d, *J* = 8.4 Hz, 1H), 5.17 (s, 1H) ppm.

**<sup>13</sup>C NMR** (101 MHz, CDCl<sub>3</sub>): δ = 151.7, 140.1, 131.6, 129.8, 128.7, 128.0, 127.3, 126.7, 124.5, 124.0, 121.5, 120.7, 117.9, 114.5, 111.7 ppm.

**HRMS** (APCI) *m/z*: [M + H]<sup>+</sup> Calcd. for C<sub>22</sub>H<sub>14</sub>NOCl<sub>2</sub><sup>+</sup> 378.0447; Found 378.0441.

**IR** (KBr): 3486, 3060, 2925, 2663, 2252, 2081, 1842, 1730, 1624, 1601, 1515, 1471, 1436, 1402, 1343, 1317, 1276, 1227, 1194, 1134, 1071, 1023, 972, 907, 863, 801, 730, 665 cm<sup>-1</sup>.

### 1-(3,6-Dibromo-9*H*-carbazol-9-yl)naphthalen-2-ol (7f)

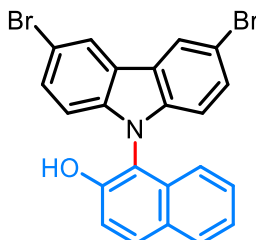

The title compound **7f** was synthesized according to the **GP-3** and isolated after silica gel column chromatography (*n*-pentane : diethyl ether – 20:1 → 4:1) as a colorless solid (85%, 79.4 mg).

**m.p.:** 155 – 158 °C.

**<sup>1</sup>H NMR** (600 MHz, CDCl<sub>3</sub>): δ = 8.15 (s, 2H), 7.86 (d, *J* = 9.0 Hz, 1H), 7.78 (d, *J* = 8.1 Hz, 1H), 7.32 (dd, *J* = 8.6, 1.7 Hz, 2H), 7.27 (d, *J* = 9.0 Hz, 1H), 7.23 (t, *J* = 7.5 Hz, 1H), 7.12 – 7.09 (m, 1H), 6.70 (d, *J* = 8.6 Hz, 2H), 6.55 (d, *J* = 8.5 Hz, 1H), 5.11 (s, 1H) ppm.

**<sup>13</sup>C NMR** (151 MHz, CDCl<sub>3</sub>): δ = 151.6, 140.3, 131.6, 131.5, 130.1, 129.8, 128.7, 128.0, 124.6, 124.5, 123.7, 121.5, 117.9, 114.4, 114.1, 112.1 ppm.

**HRMS** (APCI) *m/z*: [M + H]<sup>+</sup> Calcd. for C<sub>22</sub>H<sub>14</sub>NOBr<sub>2</sub><sup>+</sup> 465.9437; Found 465.9425.

**IR** (KBr): 3502, 3064, 2925, 2249, 2111, 1868, 1734, 1625, 1603, 1515, 1467, 1432, 1403, 1343, 1315, 1277, 1227, 1193, 1140, 1054, 1021, 970, 906, 867, 806, 729 cm<sup>-1</sup>.

### 1-(2,7-Dibromo-9*H*-carbazol-9-yl)naphthalen-2-ol (7g)

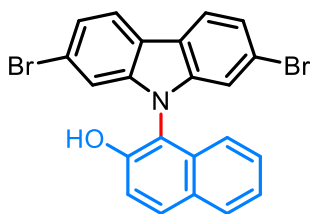

The title compound **7g** was synthesized according to the **GP-3** and isolated after silica gel column chromatography (*n*-pentane : diethyl ether – 20:1 → 4:1) as a colorless solid (86%, 80.1 mg).

**m.p.:** 226 – 228 °C

**<sup>1</sup>H NMR** (600 MHz, CDCl<sub>3</sub>): δ = 8.03 – 8.00 (m, 3H), 7.94 (d, *J* = 8.2 Hz, 1H), 7.45 (dd, *J* = 8.3, 1.4 Hz, 2H), 7.43 (d, *J* = 9.0 Hz, 1H), 7.40 (t, *J* = 7.5 Hz, 1H), 7.28 (t, *J* = 7.6 Hz, 1H), 7.09 (d, *J* = 1.4 Hz, 2H), 6.73 (d, *J* = 8.4 Hz, 1H), 5.21 (s, 1H) ppm.

**<sup>13</sup>C NMR** (151 MHz, CDCl<sub>3</sub>): δ = 151.7, 142.2, 131.8, 131.5, 129.8, 128.7, 128.2, 124.6, 124.5, 122.2, 121.9, 121.4, 120.7, 118.0, 114.0, 113.6 ppm.

**HRMS** (APCI) *m/z*: [M + H]<sup>+</sup> Calcd. for C<sub>22</sub>H<sub>14</sub>NOBr<sub>2</sub><sup>+</sup> 465.9437; Found 465.9436.

**IR (KBr):** 3875, 3481, 3399, 3062, 2922, 2853, 2659, 2326, 2108, 1993, 1900, 1700, 1623, 1587, 1518, 1480, 1421, 1326, 1272, 1224, 1198, 1138, 1050, 1000, 972, 944, 903, 851, 802, 725 cm<sup>-1</sup>.

### 1-(9*H*-[3,9'-Bicarbazol]-9-yl)naphthalen-2-ol (7h)

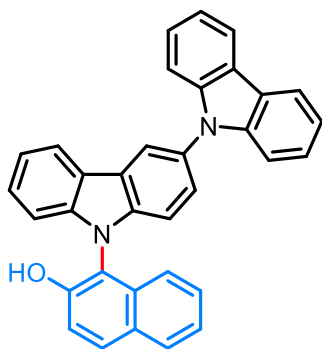

The title compound **7h** was synthesized according to the **GP-3** and isolated after silica gel column chromatography (*n*-pentane : diethyl ether – 20:1 → 4:1) as a colorless solid (73%, 69.2 mg).

**m.p.:** 189 – 192 °C.

**<sup>1</sup>H NMR** (600 MHz, CDCl<sub>3</sub>): δ = 8.38 (s, 1H), 8.21 – 8.19 (m, 3H), 8.04 (d, *J* = 9.0 Hz, 1H), 7.96 (d, *J* = 8.2 Hz, 1H), 7.52 (d, *J* = 8.5 Hz, 1H), 7.50 (d, *J* = 9.0 Hz, 1H), 7.46 – 7.41 (m, 6H), 7.38 (t, *J* = 7.4 Hz, 1H), 7.35 – 7.30 (m, 3H), 7.18 (d, *J* = 8.5 Hz, 1H), 7.06 (d, *J* = 8.2 Hz, 1H), 6.95 (d, *J* = 8.4 Hz, 1H), 5.34 (s, 1H) ppm.

**<sup>13</sup>C NMR** (151 MHz, CDCl<sub>3</sub>): δ = 151.7, 141.8, 141.7, 140.2, 131.7, 130.7, 129.8, 128.6, 127.8, 127.2, 126.0, 125.9, 124.8, 124.4, 123.4, 123.2, 121.8, 121.1, 120.9, 120.3, 119.74, 119.70, 117.8, 114.9, 111.3, 110.6, 109.8 ppm.

**HRMS** (ESI) *m/z*: [M + H]<sup>+</sup> Calcd. for C<sub>34</sub>H<sub>23</sub>N<sub>2</sub>O<sup>+</sup> 475.1805; Found 475.1822.

**IR (KBr):** 3493, 3053, 2925, 2670, 2248, 2049, 1894, 1707, 1624, 1598, 1484, 1453, 1404, 1315, 1270, 1229, 1193, 1140, 1022, 970, 906, 814, 725 cm<sup>-1</sup>.

### 1-(7*H*-Benzo[*c*]carbazol-7-yl)naphthalen-2-ol (7i)

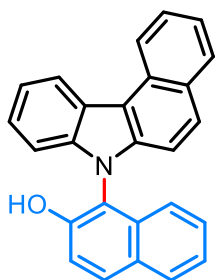

The title compound **7i** was synthesized according to the **GP-3** and isolated after silica gel column chromatography (*n*-pentane : diethyl ether – 20:1 → 4:1) as a colorless solid (86%, 62 mg).

**m.p.:** 184 – 190 °C.

**<sup>1</sup>H NMR** (400 MHz, CDCl<sub>3</sub>): δ = 8.92 (d, *J* = 8.3 Hz, 1H), 8.73 (d, *J* = 8.0 Hz, 1H), 8.05 – 8.02 (m, 2H), 7.94 (d, *J* = 8.2 Hz, 1H), 7.82 – 7.78 (m, 2H), 7.55 (t, *J* = 7.5 Hz, 1H), 7.51 7.47 (m, 2H), 7.43 – 7.35 (m, 2H), 7.21 (t, *J* = 7.7 Hz, 1H), 7.17 (d, *J* = 8.8 Hz, 1H), 7.13 (d, *J* = 8.1 Hz, 1H), 6.75 (d, *J* = 8.5 Hz, 1H), 5.33 (s, 1H) ppm.

**<sup>13</sup>C NMR** (101 MHz, CDCl<sub>3</sub>): δ = 151.9, 140.4, 139.2, 132.1, 131.3, 130.0, 129.9, 129.8, 129.5, 128.5, 128.2, 127.9, 127.4, 125.2, 124.6, 124.4, 123.7, 123.5, 122.5, 121.9, 121.5, 117.9, 116.4, 115.2, 111.9, 110.9 ppm.

**HRMS** (ESI) *m/z*: [M + H]<sup>+</sup> Calcd. for C<sub>26</sub>H<sub>18</sub>NO<sup>+</sup> 360.1383; Found 360.1395.

**IR (KBr)**: 3855, 3484, 3055, 2924, 2669, 2248, 2111, 1923, 1805, 1701, 1622, 1519, 1466, 1404, 1342, 1321, 1273, 1211, 1139, 1089, 1018, 959, 905, 850, 807, 731, 680 cm<sup>-1</sup>.

### 1-(4-(Oxiran-2-ylmethoxy)-9*H*-carbazol-9-yl)naphthalen-2-ol (7j)

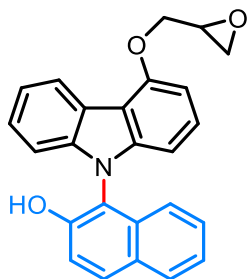

The title compound **7j** was synthesized according to the **GP-3** and isolated after silica gel column chromatography (*n*-pentane : diethyl ether – 20:1 → 4:1) as a colorless solid (68%, 51.7 mg).

**m.p.:** 175 – 179 °C.

**<sup>1</sup>H NMR** (600 MHz, CDCl<sub>3</sub>): δ = 8.49 (d, *J* = 6.6 Hz, 1H), 7.99 (d, *J* = 9.0 Hz, 1H), 7.91 (d, *J* = 8.1 Hz, 1H), 7.44 (d, *J* = 9.0 Hz, 1H), 7.37 – 7.34 (m, 3H), 7.27 – 7.26 (m, 1H), 7.24 – 7.21 (m, 1H), 6.95 (d, *J* = 7.2 Hz, 1H), 6.81 – 6.77 (m, 2H), 6.62 (d, *J* = 8.1 Hz, 1H), 5.34 (s, 1H), 4.57 – 4.55 (m, 1H), 4.35 – 3.31 (m, 1H), 3.613 – 3.612 (m, 1H), 3.05 – 3.03 (m, 1H), 2.95 – 2.94 (m, 1H) ppm.

**<sup>13</sup>C NMR** (151 MHz, CDCl<sub>3</sub>): δ = 155.2, 151.63, 151.60, 142.6, 140.4, 131.7, 131.0, 129.6, 128.4, 127.6, 127.5, 127.2, 125.7, 124.2, 124.1, 123.5, 123.0, 121.91, 121.90, 121.0, 117.78, 117.76, 115.3, 113.3, 109.7, 103.6, 102.6, 69.0, 50.4, 44.9 ppm.

**HRMS** (ESI) *m/z*: [M + H]<sup>+</sup> Calcd. for C<sub>25</sub>H<sub>20</sub>NO<sub>3</sub><sup>+</sup> 382.1438; Found 382.1429.

**IR (KBr):** 3381, 3058, 2923, 2247, 2105, 1900, 1708, 1623, 1593, 1506, 1478, 1447, 1401, 1345, 1315, 1271, 1204, 1174, 1142, 1109, 1056, 1017, 968, 906, 855, 815, 780, 722  $\text{cm}^{-1}$ .

### 8-(Indolo[2,3-*a*]carbazol-11(12*H*)-yl)naphthalen-2-ol (**7k**)

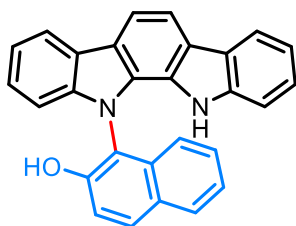

The title compound **7k** was synthesized according to the **GP-3** and isolated after silica gel column chromatography (*n*-pentane : diethyl ether – 20:1 → 4:1) as a colorless solid (42%, 33.4 mg).

**m.p.:** 207 – 210 °C.

**<sup>1</sup>H NMR** (600 MHz,  $\text{CDCl}_3$ ):  $\delta$  = 8.29 (d,  $J$  = 7.6 Hz, 1H), 8.14 (d,  $J$  = 9.0 Hz, 1H), 8.11 – 8.08 (m, 2H), 8.06 – 8.05 (m, 1H), 7.98 (d,  $J$  = 8.2 Hz, 1H), 7.56 (d,  $J$  = 9.1 Hz, 1H), 7.40 – 7.36 (m, 3H), 7.28 (t,  $J$  = 7.6 Hz, 1H), 7.22 – 7.19 (m, 2H), 7.13 – 7.12 (m, 2H), 7.03 (d,  $J$  = 7.7 Hz, 1H), 6.88 (d,  $J$  = 8.5 Hz, 1H), 5.60 (s, 1H) ppm.

**<sup>13</sup>C NMR** (151 MHz,  $\text{CDCl}_3$ ):  $\delta$  = 152.2, 140.8, 139.1, 132.4, 131.9, 129.5, 128.6, 128.5, 127.1, 125.9, 125.6, 125.3, 125.2, 124.9, 123.8, 122.7, 122.1, 121.9, 121.2, 120.5, 120.1, 119.9, 117.9, 116.5, 113.6, 112.6, 111.1, 110.3 ppm.

**HRMS (ESI)  $m/z$ :**  $[\text{M} + \text{H}]^+$  Calcd. for  $\text{C}_{28}\text{H}_{19}\text{N}_2\text{O}$  399.1492; Found 399.1482.

**IR (KBr):** 3851, 3451, 3056, 2921, 2852, 2684, 2324, 2240, 2174, 2103, 2012, 1924, 1737, 1622, 1598, 1567, 1512, 1438, 1407, 1372, 1317, 1265, 1212, 1184, 1140, 1013, 964, 904, 859, 815, 731  $\text{cm}^{-1}$ .

### 1-(1,2,3,4-Tetrahydro-9*H*-carbazol-9-yl)naphthalen-2-ol (**7l**)

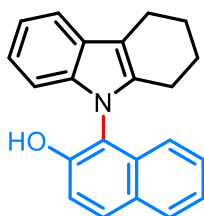

The title compound **7l** was synthesized according to the **GP-3** and isolated after silica gel column chromatography (*n*-pentane : diethyl ether – 20:1 → 4:1) as a colorless solid (36%, 22.5 mg).

**<sup>1</sup>H NMR** (400 MHz,  $\text{CDCl}_3$ ):  $\delta$  = 7.91 (d,  $J$  = 9.0 Hz, 1H), 7.86 (d,  $J$  = 8.5 Hz, 1H), 7.62 (d,  $J$  = 7.8 Hz, 1H), 7.38 – 7.28 (m, 3H), 7.18 (t,  $J$  = 7.4 Hz, 1H), 7.07 (t,  $J$  = 7.6 Hz, 1H), 6.84 – 6.81 (m, 2H), 5.36 (s, 1H), 2.93 – 2.80 (m, 2H), 2.42 – 2.35 (m, 1H), 2.30 – 2.23 (m, 1H), 1.96 – 1.90 (m, 2H), 1.88 – 1.82 (m, 2H) ppm.

**<sup>13</sup>C NMR** (151 MHz,  $\text{CDCl}_3$ ):  $\delta$  = 151.5, 137.7, 137.4, 132.7, 130.6, 129.4, 128.5, 128.3, 127.7, 124.1, 121.9, 121.9, 120.3, 118.2, 117.5, 116.3, 112.4, 110.2, 23.3, 23.2, 22.2, 21.3 ppm.

**HRMS (ESI)  $m/z$ :**  $[\text{M} + \text{H}]^+$  Calcd. for  $\text{C}_{22}\text{H}_{20}\text{NO}$  314.1539; Found 314.1546.

**IR (KBr):** 3844, 3512, 3412, 3057, 2925, 2855, 2665, 2491, 2249, 2103, 1895, 1704, 1598, 1511, 1461, 1387, 1330, 1268, 1238, 1203, 1169, 1142, 1052, 985, 949, 902, 811, 727  $\text{cm}^{-1}$ .



### 1-(10,11-Dihydro-5H-dibenzo[b,f]azepin-5-yl)naphthalen-2-ol (7m)

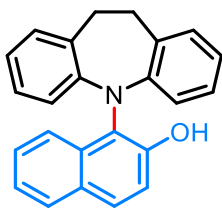

The title compound **7m** was synthesized according to the **GP-3** and isolated after silica gel column chromatography (*n*-pentane : diethyl ether – 20:1 → 4:1) as a colorless solid (79%, 53.1 mg).

**m.p.:** 119 – 122 °C.

**<sup>1</sup>H NMR** (600 MHz, CDCl<sub>3</sub>): δ = 7.90 – 7.86 (m, 2H), 7.68 – 7.67 (m, 1H), 7.39 – 7.34 (m, 3H), 7.14 (d, *J* = 7.2 Hz, 2H), 6.85 – 6.80 (m, 4H), 6.53 (d, *J* = 8.1, 2H), 5.81 (s, 1H), 3.36 (s, 4H) ppm.

**<sup>13</sup>C NMR** (151 MHz, CDCl<sub>3</sub>): δ = 151.6, 143.9, 132.3, 132.2, 130.8, 130.3, 130.0, 128.7, 127.6, 127.2, 125.3, 124.1, 122.9, 121.2, 120.5, 118.0, 37.5 ppm.

**HRMS** (ESI) *m/z*: [M + H]<sup>+</sup> Calcd. for C<sub>24</sub>H<sub>20</sub>NO<sup>+</sup> 338.1539; Found 338.1532.

**IR (KBr):** 3498, 3458, 3060, 3020, 2920, 2853, 2329, 2108, 1900, 1622, 1592, 1482, 1441, 1384, 1297, 1261, 1190, 1133, 1114, 1063, 962, 941, 904, 863, 815, 741 cm<sup>-1</sup>.

### 1-(Diphenylamino)naphthalen-2-ol (7n)

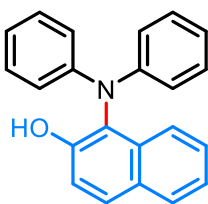

The title compound **7n** was synthesized according to the **GP-3** and isolated after silica gel column chromatography (*n*-pentane : diethyl ether – 20:1 → 4:1) as a colorless solid (77%, 48.0 mg).

**m.p.:** 163 – 167 °C.

**<sup>1</sup>H NMR** (600 MHz, CDCl<sub>3</sub>): δ = 7.85 -7.82 (m, 2H), 7.74 (d, *J* = 7.8 Hz, 1H), 7.37 – 7.31 (m, 3H), 7.23 (t, *J* = 7.8 Hz, 4H), 7.13 (d, *J* = 8.0 Hz, 4H), 6.97 (t, *J* = 7.3 Hz, 2H), 5.91 (s, 1H) ppm.

**<sup>13</sup>C NMR** (151 MHz, CDCl<sub>3</sub>): δ = 151.9, 146.1, 132.7, 130.3, 129.7, 129.6, 128.6, 127.4, 124.0, 123.9, 122.8, 122.4, 120.4, 118.1 ppm.

**HRMS** (ESI) *m/z*: [M + H]<sup>+</sup> Calcd. for C<sub>22</sub>H<sub>18</sub>NO<sup>+</sup> 312.1383; Found 312.1390.

**IR (KBr):** 3511, 3463, 3374, 3057, 2923, 2854, 2325, 2160, 2108, 1799, 1587, 1489, 1385, 1297, 1200, 1175, 1139, 1077, 1025, 962, 905, 863, 812, 780, 747, 692 cm<sup>-1</sup>.

### 1-(10H-Phenoxazin-10-yl)naphthalen-2-ol (7o)

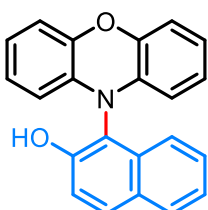

The title compound **7o** was synthesized according to the **GP-3** and isolated after silica gel column chromatography (*n*-pentane : diethyl ether – 20:1 → 4:1) as a colorless solid (48%, 31.3 mg).

**m.p.:** 108 – 110 °C.

**<sup>1</sup>H NMR** (600 MHz, CDCl<sub>3</sub>): δ = 7.93 (d, *J* = 8.9 Hz, 1H), 7.89 (d, *J* = 7.5 Hz, 1H), 7.80 (d, *J* = 8.0 Hz, 1H), 7.42 – 7.37 (m, 3H), 6.81 (d, *J* = 7.8 Hz, 2H), 6.73 – 7.68 (m, 2H), 6.56 (t, *J* = 7.8 Hz, 2H), 6.17 (s, 1H), 5.85 (d, *J* = 7.7 Hz, 2H) ppm.

**<sup>13</sup>C NMR** (151 MHz, CDCl<sub>3</sub>): δ = 144.4, 131.1, 130.6, 129.0, 127.8, 124.2, 124.0, 122.6, 122.4, 117.8, 116.1, 116.0, 113.8 ppm.

**HRMS** (ESI) *m/z*: [M + H]<sup>+</sup> Calcd. for C<sub>22</sub>H<sub>16</sub>NO<sub>2</sub><sup>+</sup> 326.1176; Found 326.1169.

**IR** (KBr): 3822, 3413, 3059, 2923, 2853, 2612, 2324, 2166, 2066, 1990, 1915, 1745, 1623, 1597, 1482, 1391, 1326, 1270, 1188, 1135, 1068, 1038, 967, 915, 863, 818, 731 cm<sup>-1</sup>.

### 1-(9*H*-Carbazol-9-yl)-6-methoxynaphthalen-2-ol (**7p**)

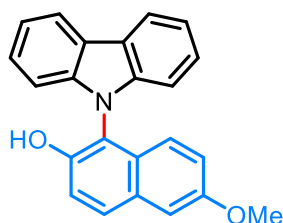

The title compound **7p** was synthesized according to the **GP-3** and isolated after silica gel column chromatography (*n*-pentane : diethyl ether – 20:1 → 4:1) as a colorless solid (88%, 59.9 mg).

**m.p.:** 170 – 173 °C.

**<sup>1</sup>H NMR** (600 MHz, CDCl<sub>3</sub>): δ = 8.22 (d, *J* = 7.6 Hz, 2H), 7.88 (d, *J* = 9.0 Hz, 1H), 7.43 (d, *J* = 9.0 Hz, 1H), 7.42 – 7.39 (m, 4H), 7.24 (s, 1H), 7.00 (d, *J* = 7.9 Hz, 2H), 6.91 (d, *J* = 9.2 Hz, 1H), 6.73 (d, *J* = 9.2 Hz, 1H), 5.21 (s, 1H), 3.88 (s, 3H) ppm.

**<sup>13</sup>C NMR** (151 MHz, CDCl<sub>3</sub>): δ = 156.6, 150.0, 141.2, 130.8, 129.6, 127.1, 126.6, 123.8, 123.6, 120.69, 120.66, 120.1, 118.4, 115.6, 110.4, 107.0, 55.5 ppm.

**HRMS** (ESI) *m/z*: [M + H]<sup>+</sup> Calcd. for C<sub>23</sub>H<sub>18</sub>NO<sub>2</sub><sup>+</sup> 340.1332; Found 340.1343.

**IR** (KBr): 3482, 3056, 2937, 2838, 2675, 2249, 2061, 1900, 1777, 1603, 1517, 1478, 1449, 1384, 1336, 1312, 1232, 1195, 1135, 1073, 1029, 974, 945, 906, 851, 817, 726, 679 cm<sup>-1</sup>.

### 6-Bromo-1-(9*H*-carbazol-9-yl)naphthalen-2-ol (**7q**)

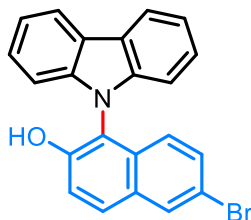

The title compound **7q** was synthesized according to the **GP-3** and isolated after silica gel column chromatography (*n*-pentane : diethyl ether – 20:1 → 4:1) as a colorless solid (79%, 61.0 mg).

**m.p.:** 119 – 123 °C.

**<sup>1</sup>H NMR** (600 MHz, CDCl<sub>3</sub>): δ = 8.22 (d, *J* = 8.3 Hz, 2H), 8.08 (d, *J* = 1.8 Hz, 1H), 7.90 (d, *J* = 9.0 Hz, 1H), 7.47 (d, *J* = 9.1 Hz, 1H), 7.39 – 7.34 (m, 4H), 7.29 (dd, *J* = 9.0, 1.9 Hz, 1H), 6.95 (d, *J* = 7.6 Hz, 2H), 6.68 (d, *J* = 9.0 Hz, 1H), 5.35 (s, 1H) ppm.

**<sup>13</sup>C NMR** (151 MHz, CDCl<sub>3</sub>): δ = 151.9, 140.9, 130.8, 130.7, 130.4, 130.3, 130.0, 126.6, 123.8, 123.7, 120.8, 120.7, 119.0, 118.0, 115.4, 110.1 ppm.

**HRMS** (ESI) *m/z*: [M + H]<sup>+</sup> Calcd. for C<sub>22</sub>H<sub>15</sub>NOBr<sup>+</sup> 388.0332; Found 388.0329.

**IR (KBr)**: 3838, 3451, 3053, 2925, 2672, 2327, 2110, 1991, 1901, 1772, 1619, 1590, 1474, 1447, 1378, 1334, 1262, 1226, 1192, 1141, 1072, 1019, 973, 905, 846, 813, 723 cm<sup>-1</sup>.

### 5-(9*H*-Carbazol-9-yl)-6-hydroxynaphthalen-2-yl acetate (**7r**)

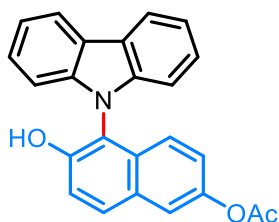

The title compound **7r** was synthesized according to the **GP-3** and isolated after silica gel column chromatography (*n*-pentane : diethyl ether – 20:1 → 4:1) as a colorless solid (72%, 53.0 mg).

**m.p.**: 169 – 172 °C.

**<sup>1</sup>H NMR** (600 MHz, CDCl<sub>3</sub>): δ = 8.22 – 8.21 (m, 2H), 7.93 (d, *J* = 9.0 Hz, 1H), 7.63 (d, *J* = 2.3 Hz, 1H), 7.46 (d, *J* = 9.0 Hz, 1H), 7.38 – 7.32 (m, 4H), 6.97 – 6.94 (m, 3H), 6.80 (d, *J* = 9.1 Hz, 1H), 5.37 (s, 1H), 2.30 (s, 3H) ppm.

**<sup>13</sup>C NMR** (151 MHz, CDCl<sub>3</sub>): δ = 169.8, 151.7, 147.3, 141.1, 130.7, 130.0, 129.9, 126.7, 123.9, 123.7, 122.7, 120.8, 120.7, 119.4, 118.9, 115.5, 110.4, 21.29 ppm.

**HRMS** (ESI) *m/z*: [M + Na]<sup>+</sup> Calcd. for C<sub>24</sub>H<sub>17</sub>NO<sub>3</sub>Na<sup>+</sup> 390.1101; Found 390.1086.

**IR (KBr)**: 3417, 3055, 2925, 2675, 2316, 2106, 1904, 1748, 1602, 1516, 1480, 1450, 1391, 1367, 1338, 1312, 1195, 1138, 1011, 961, 910, 886, 818, 749, 727 cm<sup>-1</sup>.

### 1-(9*H*-Carbazol-9-yl)-7-methoxynaphthalen-2-ol (**7s**)

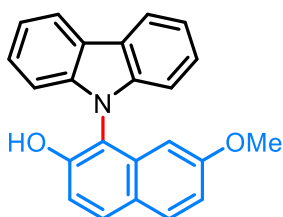

The title compound **7s** was synthesized according to the **GP-3** and isolated after silica gel column chromatography (*n*-pentane : diethyl ether – 20:1 → 4:1) as a colorless solid (84%, 56.9 mg).

**m.p.**: 160 – 163 °C.

**<sup>1</sup>H NMR** (400 MHz, CDCl<sub>3</sub>): δ = 8.08 (d, *J* = 7.6 Hz, 2H), 7.77 (d, *J* = 8.9 Hz, 1H), 7.68 (d, *J* = 8.9 Hz, 1H), 7.26 (t, *J* = 7.0 Hz, 2H), 7.21 (t, *J* = 7.2 Hz, 2H), 7.16 (d, *J* = 8.9 Hz, 1H), 6.91 – 6.97 (m, 3H), 5.98 (d, *J* = 2.3 Hz, 1H), 5.15 (s, 1H), 3.24 (s, 3H) ppm.

$^{13}\text{C}$  NMR (101 MHz,  $\text{CDCl}_3$ ):  $\delta = 159.2, 152.3, 140.9, 133.3, 130.7, 130.1, 126.5, 125.1, 123.9, 120.7, 120.6, 116.4, 115.2, 114.6, 110.5, 101.0, 55.1$  ppm.

HRMS (ESI)  $m/z$ :  $[\text{M} + \text{Na}]^+$  Calcd. for  $\text{C}_{23}\text{H}_{17}\text{NO}_2\text{Na}^+$  362.1152; Found 362.1160.

IR (KBr): 3858, 3479, 3055, 2936, 2834, 2673, 2324, 2252, 2086, 1992, 1895, 1622, 1515, 1459, 1390, 1354, 1336, 1312, 1264, 1225, 1185, 1144, 1066, 1029, 1005, 906, 832, 800, 728  $\text{cm}^{-1}$ .

### 7-Bromo-1-(9H-carbazol-9-yl)naphthalen-2-ol (7t)

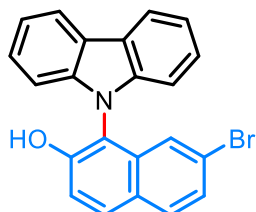

The title compound **7t** was synthesized according to the **GP-3** and isolated after silica gel column chromatography (*n*-pentane : diethyl ether – 20:1  $\rightarrow$  4:1) as a colorless solid (75%, 58.2 mg).

m.p.: 155 – 162  $^{\circ}\text{C}$ .

$^1\text{H}$  NMR (600 MHz,  $\text{CDCl}_3$ ):  $\delta = 8.23$  (d,  $J = 7.4$  Hz, 2H), 7.95 (d,  $J = 9.0$  Hz, 1H), 7.78 (d,  $J = 8.7$  Hz, 1H), 7.46 – 7.43 (m, 2H), 7.40 – 7.35 (m, 4H), 7.03 (s, 1H), 6.96 (d,  $J = 7.9$  Hz, 2H), 5.30 (s, 1H) ppm.

$^{13}\text{C}$  NMR (151 MHz,  $\text{CDCl}_3$ ):  $\delta = 152.6, 140.8, 133.3, 131.0, 130.2, 128.2, 127.9, 126.8, 124.1, 124.0, 122.5, 121.0, 120.8, 118.4, 114.6, 110.2$  ppm.

HRMS (APCI)  $m/z$ :  $[\text{M}]^+$  Calcd. for  $\text{C}_{22}\text{H}_{14}\text{NOBr}^+$  387.0253; Found 387.0243.

IR (KBr): 3479, 3056, 2924, 2853, 2673, 2249, 2081, 1896, 1779, 1735, 1619, 1595, 1501, 1455, 1376, 1336, 1312, 1255, 1225, 1184, 1148, 1075, 994, 906, 868, 834, 726  $\text{cm}^{-1}$ .

### 3-Bromo-1-(9H-carbazol-9-yl)naphthalen-2-ol (7u)

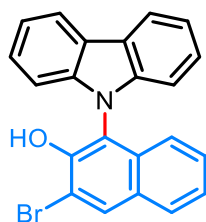

The title compound **7u** was synthesized according to the **GP-3** and isolated after silica gel column chromatography (*n*-pentane : diethyl ether – 20:1  $\rightarrow$  4:1) as a colorless solid (61%, 47.5 mg).

m.p.: 218 – 222  $^{\circ}\text{C}$ .

$^1\text{H}$  NMR (600 MHz,  $\text{CDCl}_3$ ):  $\delta = 8.30$  (s, 1H), 8.24 (d,  $J = 7.4$  Hz, 2H), 7.85 (d,  $J = 8.2$  Hz, 1H), 7.41 – 7.34 (m, 5H), 7.28 (d,  $J = 8.0$  Hz, 1H), 6.96 (d,  $J = 7.6$  Hz, 2H), 6.90 (d,  $J = 8.5$  Hz, 1H), 5.73 (s, 1H) ppm.

$^{13}\text{C}$  NMR (151 MHz,  $\text{CDCl}_3$ ):  $\delta = 148.6, 141.1, 133.1, 131.4, 129.8, 128.1, 127.6, 126.5, 125.4, 123.9, 122.5, 120.8, 120.7, 116.9, 111.8, 110.3$  ppm.

HRMS (ESI)  $m/z$ :  $[\text{M} + \text{Na}]^+$  Calcd. for  $\text{C}_{22}\text{H}_{14}\text{NONa}^+$  410.0151; Found 410.0167.

**IR (KBr):** 3855, 3467, 3057, 2924, 2854, 2674, 2315, 2112, 2000, 1908, 1707, 1618, 1584, 1503, 1451, 1396, 1339, 1311, 1227, 1186, 1134, 1071, 992, 852, 725  $\text{cm}^{-1}$ .

### 10-(9H-Carbazol-9-yl)phenanthren-9-ol (7v)

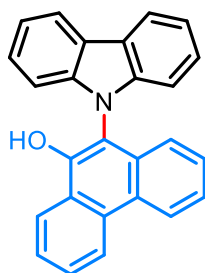

The title compound **7v** was synthesized according to the **GP-3** and isolated after silica gel column chromatography (*n*-pentane : diethyl ether – 20:1 → 1:1) as a colorless solid (90%, 65.0 mg).

**m.p.:** 217 – 221 °C.

**<sup>1</sup>H NMR** (600 MHz,  $\text{CDCl}_3$ ):  $\delta$  = 8.82 (d,  $J$  = 8.4 Hz, 1H), 8.74 (d,  $J$  = 8.3 Hz, 1H), 8.51 (dd,  $J$  = 8.1, 0.8 Hz, 1H), 8.29 – 8.27 (m, 2H), 7.85 (t,  $J$  = 7.7 Hz, 1H), 7.77 (t,  $J$  = 7.6 Hz, 1H), 7.52 (t,  $J$  = 7.6 Hz, 1H), 7.40 – 7.37 (m, 4H), 7.29 (t,  $J$  = 7.6 Hz, 1H), 7.08 – 7.06 (m, 2H), 6.77 (dd,  $J$  = 8.2, 0.7 Hz, 1H), 5.78 (s, 1H) ppm.

**<sup>13</sup>C NMR** (151 MHz,  $\text{CDCl}_3$ ):  $\delta$  = 148.4, 141.2, 131.6, 130.0, 128.4, 127.7, 127.2, 127.0, 126.6, 125.0, 124.9, 123.9, 123.7, 123.0, 122.8, 122.5, 120.8, 120.7, 111.7, 110.5 ppm.

**HRMS** (ESI)  $m/z$ :  $[\text{M} + \text{Na}]^+$  Calcd. for  $\text{C}_{26}\text{H}_{17}\text{NONa}^+$  382.1202; Found 382.1210.

**IR (KBr):** 3842, 3461, 3060, 2674, 2323, 2194, 2117, 2011, 1896, 1629, 1602, 1531, 1496, 1446, 1368, 1337, 1306, 1256, 1228, 1202, 1156, 1111, 1024, 850, 823, 749, 722, 685  $\text{cm}^{-1}$ .

### 1,1'-(9H-Carbazole-3,9-diyl)bis(naphthalen-2-ol) (8)

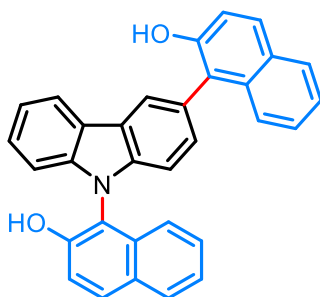

**Method A:** In a 10.0 mL oven dried reaction tube, carbazole **1a** (0.3 mmol, 50.2 mg), 1-diazonaphthalen-2(1H)-one **5a** (0.66 mmol, 112.0 mg), [1,3-bis(2,6-diisopropylphenyl)imidazol-2-ylidene]AuCl (1 mol%, 1.9 mg), Pd(OAc)<sub>2</sub> (3 mol%, 2 mg) and AgSbF<sub>6</sub> (3 mol%, 3.1 mg) were taken and 3.0 mL of dry DCM was added. The reaction mixture was allowed to stir at 32 °C for 12 hours. After completion of the reaction, the crude product was purified by silica gel column chromatography using *n*-pentane/ diethyl ether as eluent (20:1 → 1:1) to obtained the product **8** as colorless solid (38%, 51.5 mg)

**Method B:** In a 10.0 mL oven dried reaction tube, carbazole **1a** (0.2 mmol, 33.4 mg), diazoalkane (0.3 mmol, 51 mg), Pd(OAc)<sub>2</sub> (3 mol%, 1.4 mg) were taken and 2.0 mL of dry DCM was added. The reaction mixture was allowed to stir at 40 °C for 12 hours. After completion of the reaction, the crude product was purified by silica gel column chromatography using *n*-pentane/ diethyl ether eluent. After that, [1,3-

bis(2,6-diisopropylphenyl)imidazol-2-ylidene]AuCl (1 mol%, 1.3 mg) and AgSbF<sub>6</sub> (3 mol%, 2.1 mg) were to the reaction mixture. In another tube, diazoalkane **5a** (0.2 mmol, 34 mg) was dissolved in 1 mL dry DCM and added to the reaction mixture over 1 hour via syringe pump and stirred for 6 hours. Then, the crude product was purified by silica gel column chromatography using *n*-pentane/ diethyl ether as eluent (20:1 → 1:1) to obtain the product **8** as colorless solid (51%, 46 mg).

**m.p.:** 156 – 162 °C.

**<sup>1</sup>H NMR** (600 MHz, CDCl<sub>3</sub>): δ = 8.29 (s, 1H), 8.19 (d, *J* = 7.6 Hz, 1H), 8.04 (d, *J* = 9.0 Hz, 1H), 7.96 (dd, *J* = 8.1, 3.3 Hz, 1H), 7.85 (d, *J* = 8.8 Hz, 2H), 7.55 – 7.53 (m, 0.5H), 7.50 – 7.48 (m, 1.5H), 7.44 – 7.40 (m, 3H), 7.37 – 7.30 (m, 5H), 7.19 (d, *J* = 8.2 Hz, 1H), 7.05 (d, *J* = 8.1 Hz, 1H), 7.00 (d, *J* = 8.4 Hz, 0.48H), 6.94 (d, *J* = 8.5 Hz, 0.52H), 5.41 (s, 0.52H), 5.38 (s, 0.52H), 5.36 (s, 0.48H), 5.32 (s, 0.48H) ppm.

**<sup>13</sup>C NMR** (151 MHz, CDCl<sub>3</sub>): δ = 151.8, 151.7, 150.8, 141.7, 141.14, 141.12, 134.1, 134.0, 131.9, 131.8, 131.38, 131.36, 129.9, 129.6, 129.5, 129.4, 129.1, 128.7, 128.2, 127.9, 127.3, 127.2, 126.6, 126.0, 125.1, 125.0, 124.9, 124.5, 123.5, 123.4, 123.44, 123.41, 122.0, 121.9, 121.6, 121.5, 121.21, 121.20, 120.9, 118.0, 117.46, 117.45, 115.1, 115.0, 111.6, 110.7 ppm.

**HRMS** (ESI) *m/z*: [M + Na]<sup>+</sup> Calcd. for C<sub>32</sub>H<sub>21</sub>NO<sub>2</sub>Na<sup>+</sup> 474.1465; Found 474.1461.

**IR** (KBr): 3880, 3649, 3504, 3053, 2924, 2853, 2663, 2324, 2170, 2100, 1982, 1897, 1759, 1621, 1597, 1512, 1480, 1457, 1388, 1326, 1265, 1228, 1200, 1170, 1140, 1070, 1024, 970, 893, 862, 813, 774, 742 cm<sup>-1</sup>.

### 1,1'-(9*H*-Carbazole-3,6-diyl)bis(naphthalen-2-ol) (**9**)

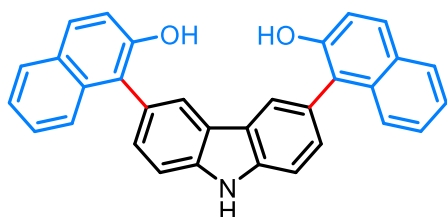

In a 10.0 mL oven dried reaction tube, carbazole **1a** (0.2 mmol, 33.4 mg), [1,3-bis(2,6-diisopropylphenyl)imidazol-2-ylidene]AuCl (3 mol%, 3.7 mg) and AgSbF<sub>6</sub> (9 mol%, 6.2 mg) were taken and 1.5 mL of dry DCM was added. In another tube, diazoalkane (0.42 mmol, 71.5 mg) was dissolved in 1 mL dry DCM and added to the reaction mixture over 1 hour via syringe pump. The reaction mixture was allowed to stir for 12 hours. After completion of the reaction, the crude product was purified by silica gel column chromatography using *n*-pentane/ diethyl ether (20:1 → 1:1) eluent to afford compound **9** as colorless solid in 46% yield (41.4 mg).

**m.p.:** 168 – 172 °C.

**<sup>1</sup>H NMR** (600 MHz, CDCl<sub>3</sub>): δ = 8.42 (br, 1H), 8.11 (s, 2H), 7.83 (d, *J* = 8.6 Hz, 4H), 7.71 (d, *J* = 8.3 Hz, 2H), 7.50 (d, *J* = 8.3 Hz, 2H), 7.46 – 7.45 (m, 2H), 7.32 – 7.29 (m, 6H), 5.27 (s, 2H) ppm.

**<sup>13</sup>C NMR** (151 MHz, CDCl<sub>3</sub>): δ = 150.8, 139.9, 134.0, 129.60, 129.55, 129.52, 129.1, 128.2, 126.6, 126.5, 125.3, 125.0, 124.2, 123.4, 123.3, 123.37, 121.5, 117.43, 117.41, 112.3 ppm.

**HRMS** (ESI) *m/z*: [M + K]<sup>+</sup> Calcd. for C<sub>32</sub>H<sub>21</sub>NO<sub>2</sub>K<sup>+</sup> 490.1204; Found 490.1221.

**IR** (KBr): 3865, 3645, 3515, 3413, 3056, 2924, 2854, 2651, 2288, 2076, 2009, 1895, 1720, 1617, 1597, 1511, 1490, 1464, 1387, 1345, 1309, 1281, 1239, 1194, 1170, 1141, 1026, 983, 949, 894, 864, 813, 747, 675 cm<sup>-1</sup>.

## References:

1. D. Dar'in, G. Kantin and M. A Krasavin, *Chem. Commun.*, 2019, **55**, 5239–5242.
2. (a) M. Kitamura, R. Sakata, N. Tashiro, A. Ikegami and T. Okauchi, *Bull. Chem. Soc. Jpn.*, 2015, **88**, 824–833; (b) A. C. S. Reddy, P. M. Reddy, P. Anbarasan, *Adv. Synth. Catal.*, 2020, **362**, 801–806; (c) Z. Liu, J.-Q. Wu and S. D. Yang, *Org. Lett.*, 2017, **19**, 5434–5437.

## Spectra of compounds

### 1-(9*H*-Carbazol-3-yl)naphthalen-2-ol (6a)

$^1\text{H}$  NMR (600 MHz, Chloroform-*d*)

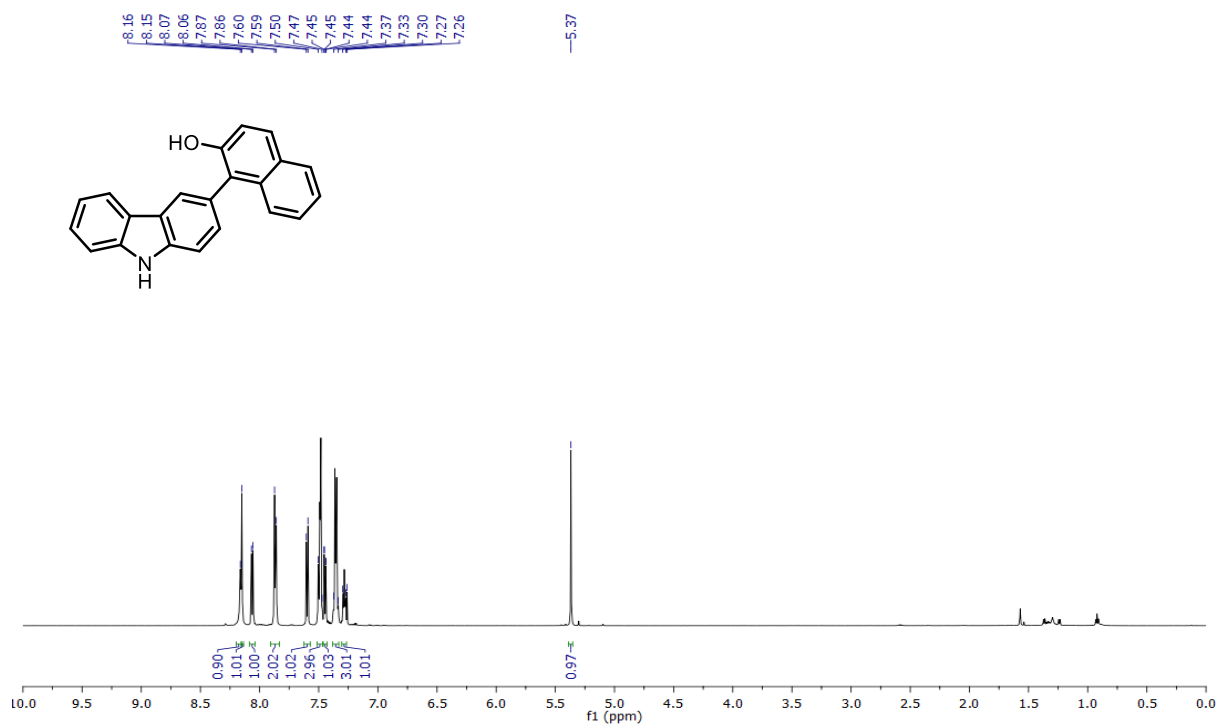

$^{13}\text{C}$  NMR (151 MHz, Chloroform-*d*)

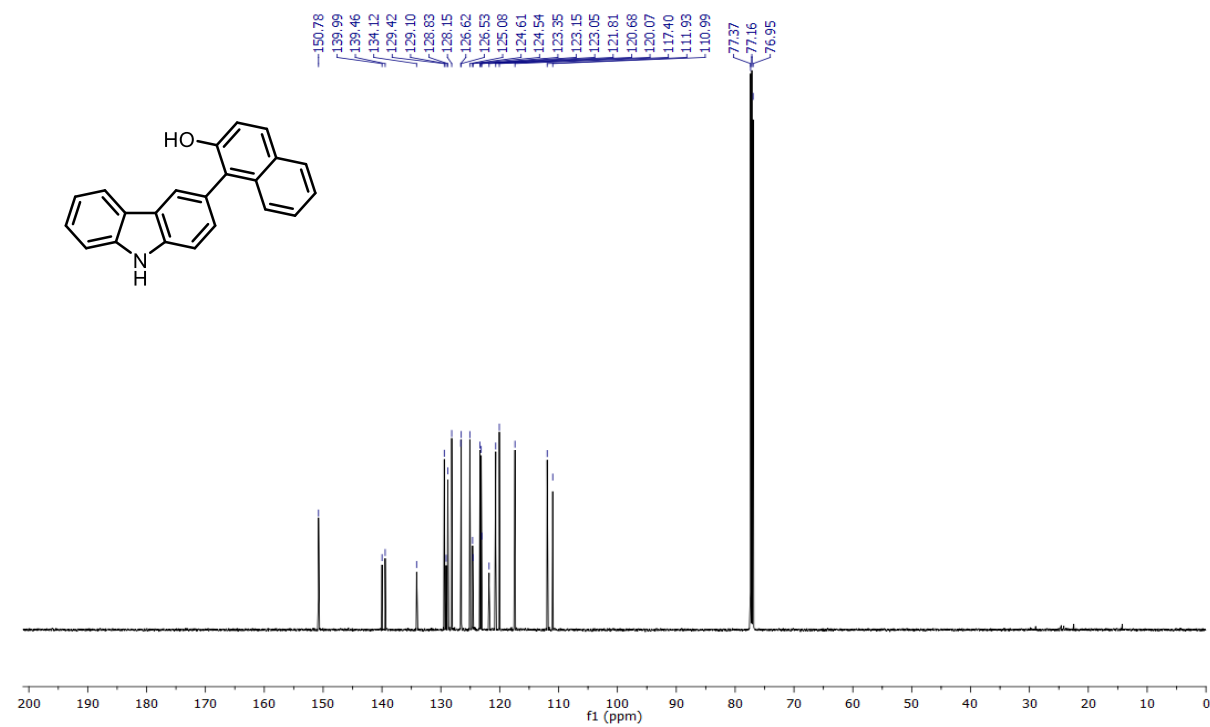



# 1-(6-Fluoro-9H-carbazol-3-yl)naphthalen-2-ol (6b)

<sup>1</sup>H NMR (600 MHz, Chloroform-*d*)

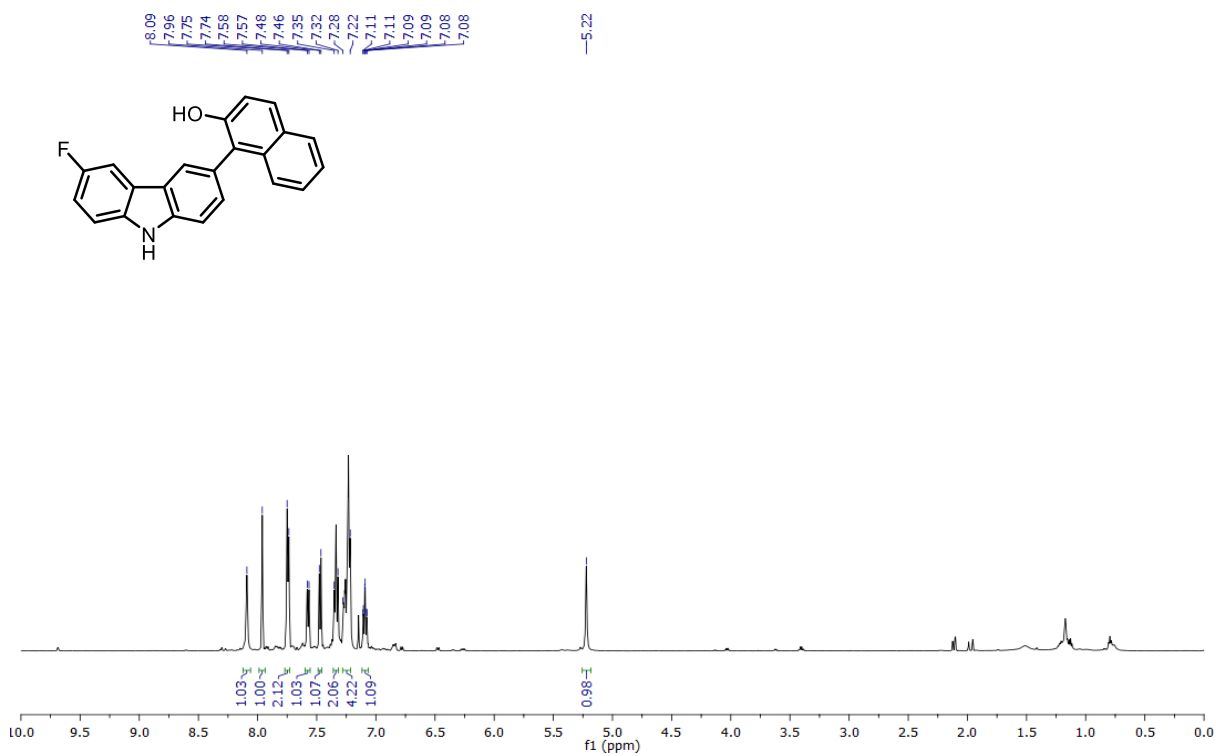

<sup>13</sup>C NMR (151 MHz, Chloroform-*d*)

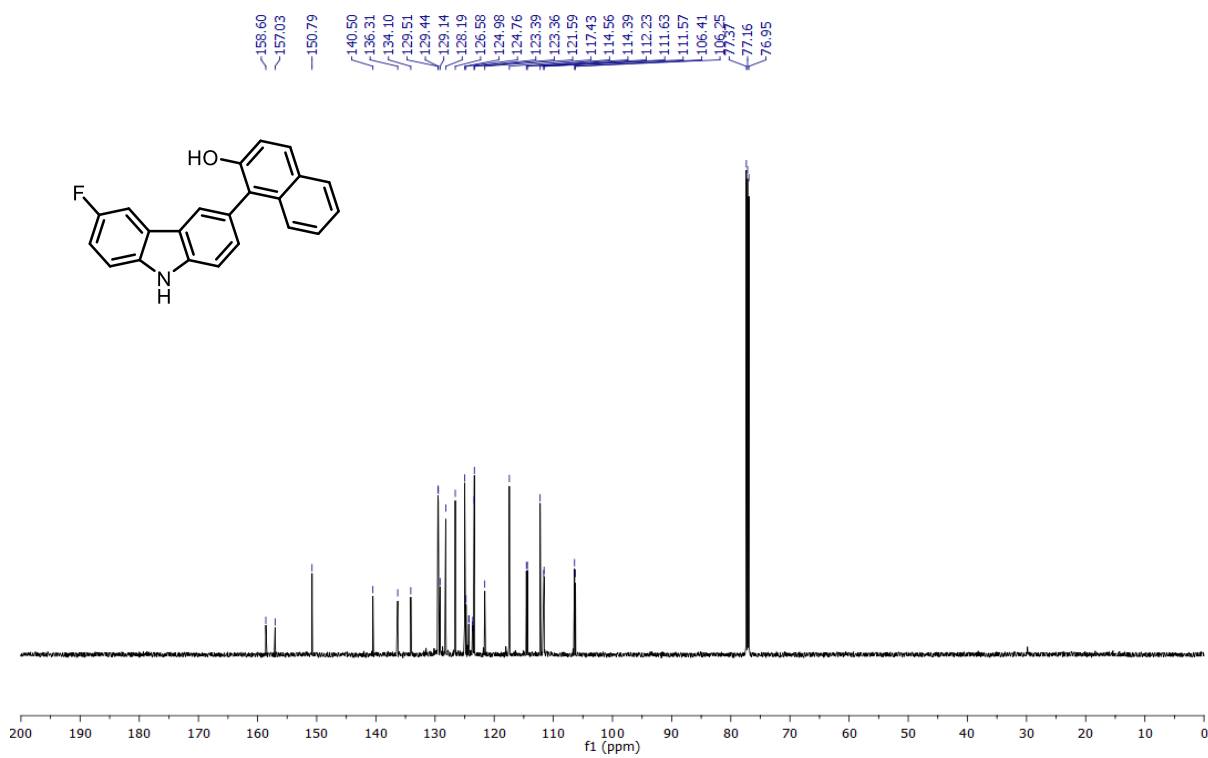

**<sup>19</sup>F NMR (565 MHz, Chloroform-*d*)**

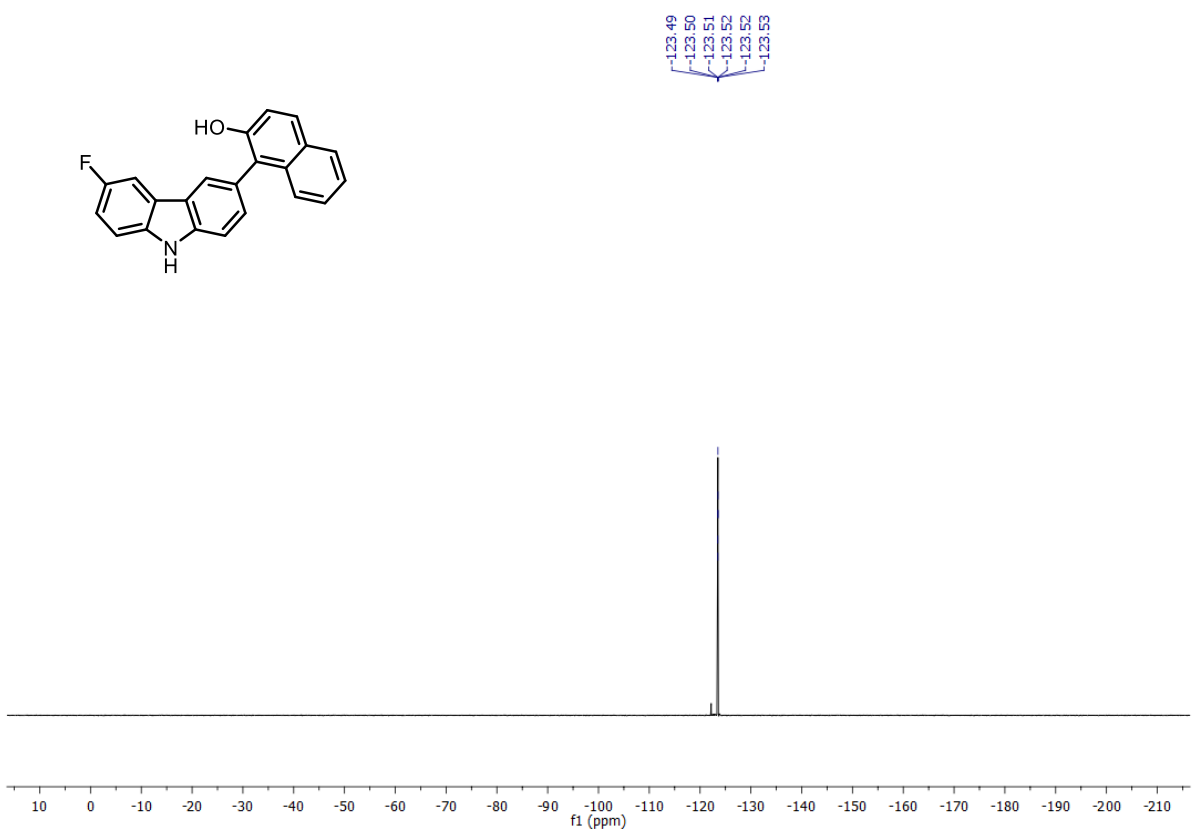

**1-(7-Bromo-9H-carbazol-3-yl)naphthalen-2-ol (6c) and 1-(2-Bromo-9H-carbazol-3-yl)naphthalen-2-ol (6c')**

<sup>1</sup>H NMR (600 MHz, Chloroform-*d*)

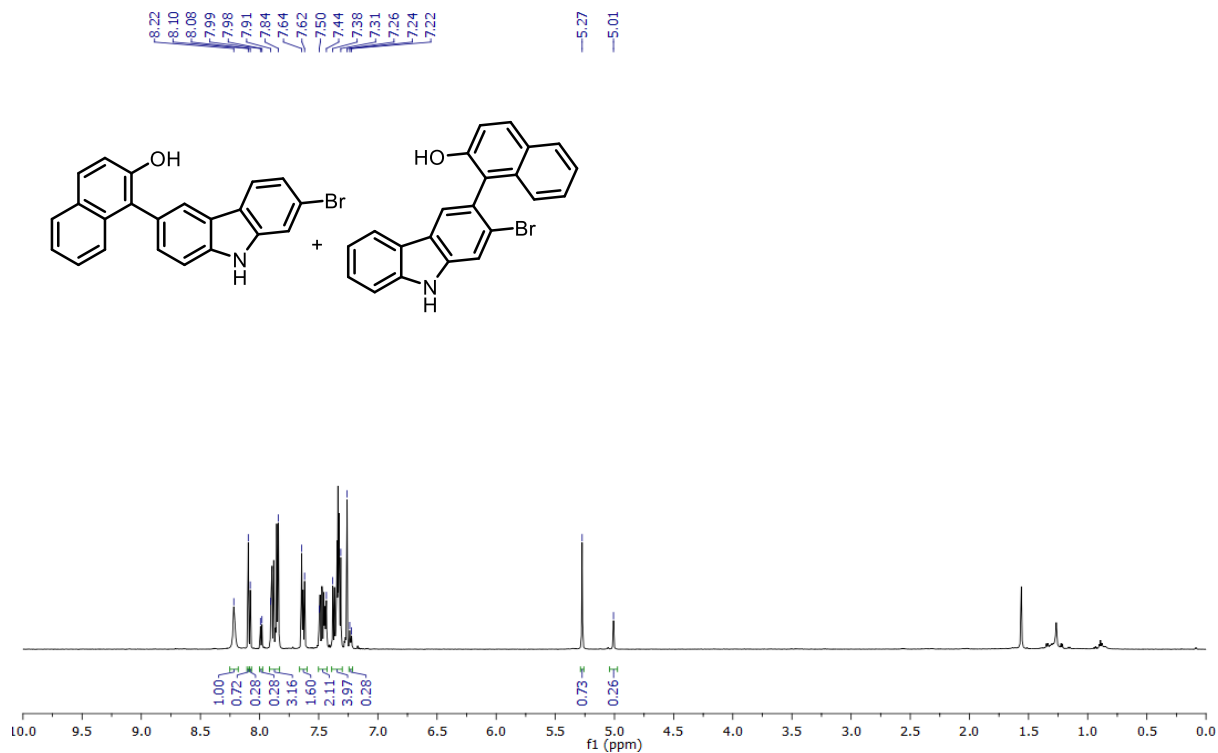

<sup>13</sup>C NMR (151 MHz, Chloroform-*d*)

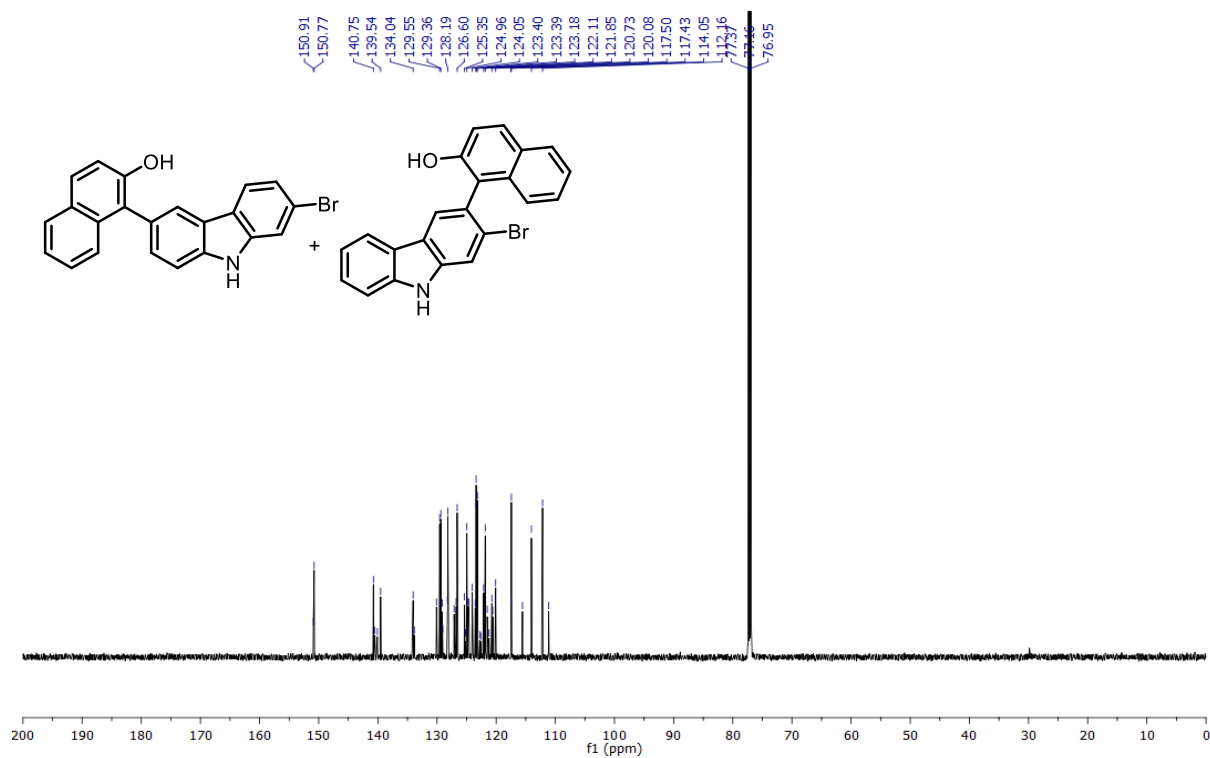

# 1-(2,7-Dibromo-9H-carbazol-3-yl)naphthalen-2-ol (6d)

$^1\text{H}$  NMR (600 MHz, Chloroform-*d*)

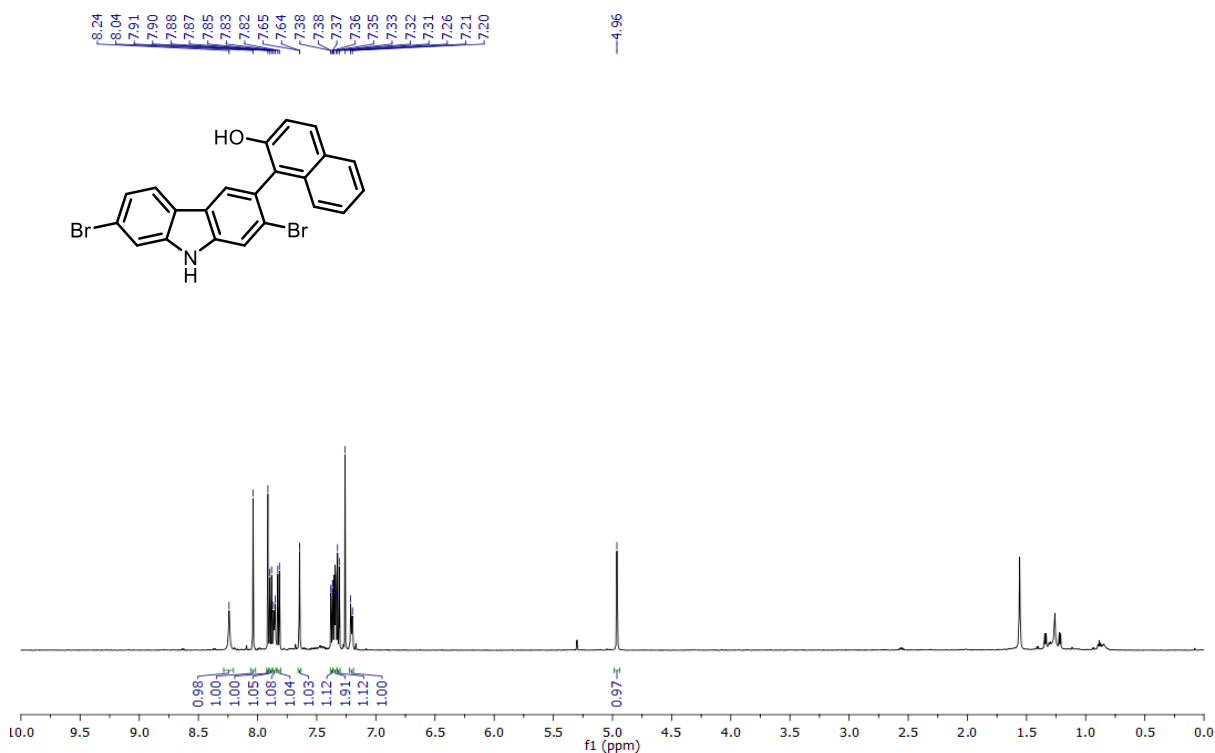

$^{13}\text{C}$  NMR (151 MHz, Chloroform-*d*)

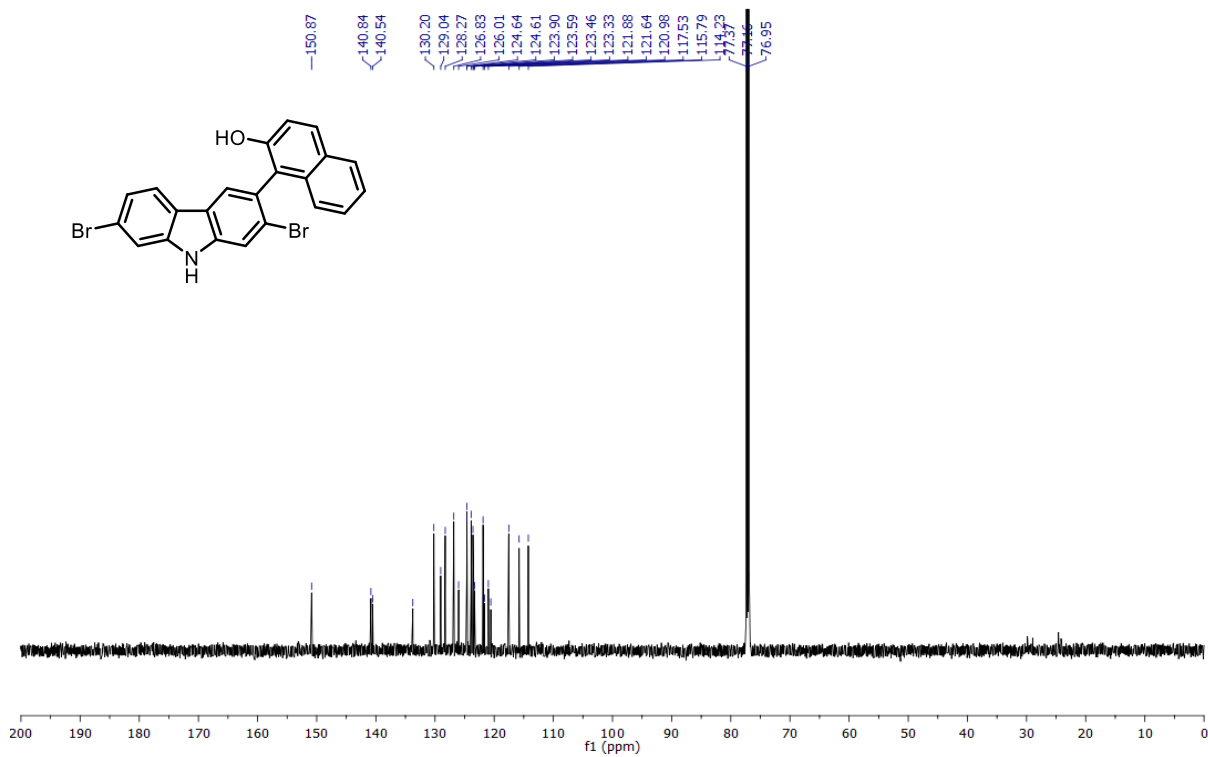

# 1-(9-(4-Methoxyphenyl)-9H-carbazol-3-yl)naphthalen-2-ol (6e)

$^1\text{H NMR}$  (400 MHz, Chloroform-*d*)

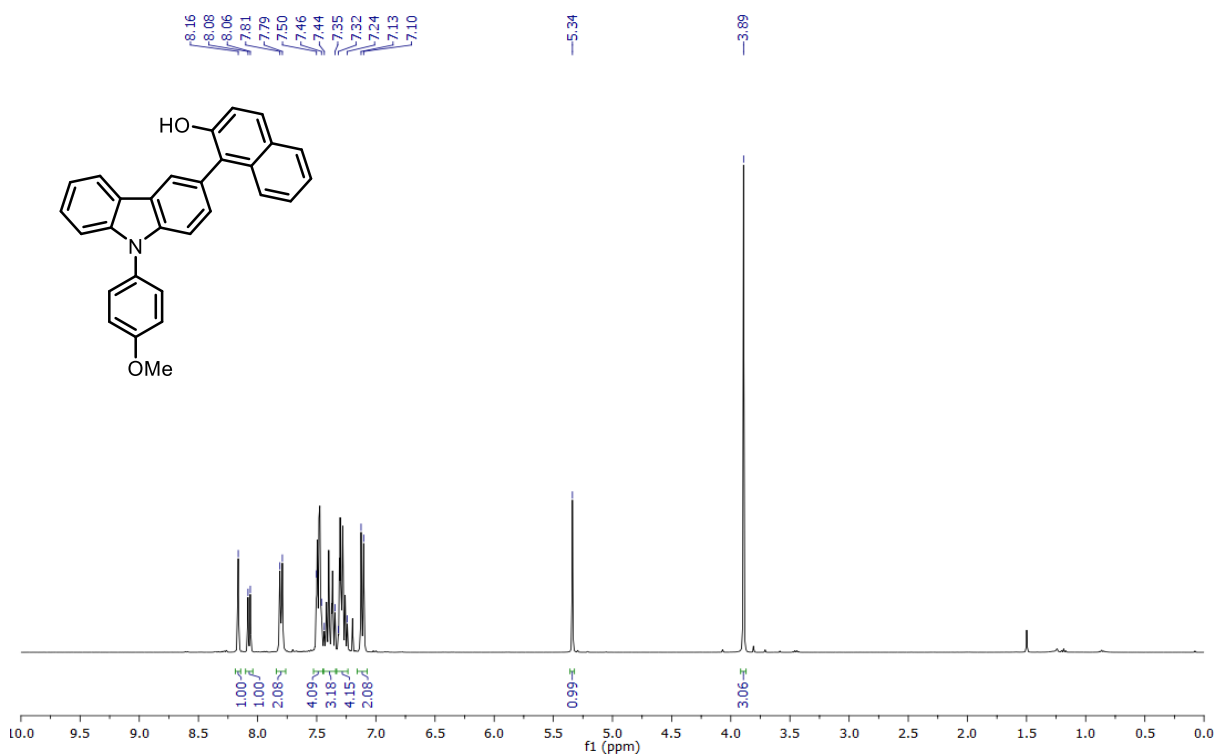

$^{13}\text{C NMR}$  (101 MHz, Chloroform-*d*)

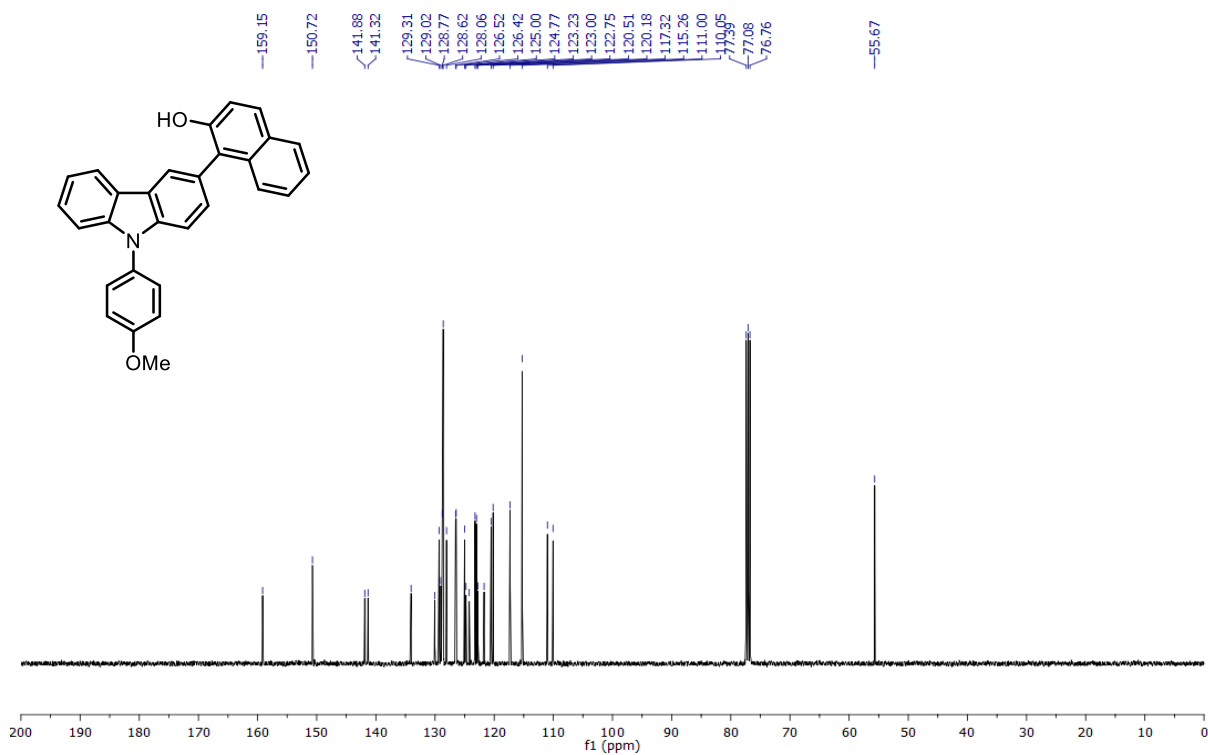

# 1-(9-(4-Chlorophenyl)-9H-carbazol-3-yl)naphthalen-2-ol (6f)

$^1\text{H NMR}$  (600 MHz, Chloroform-*d*)

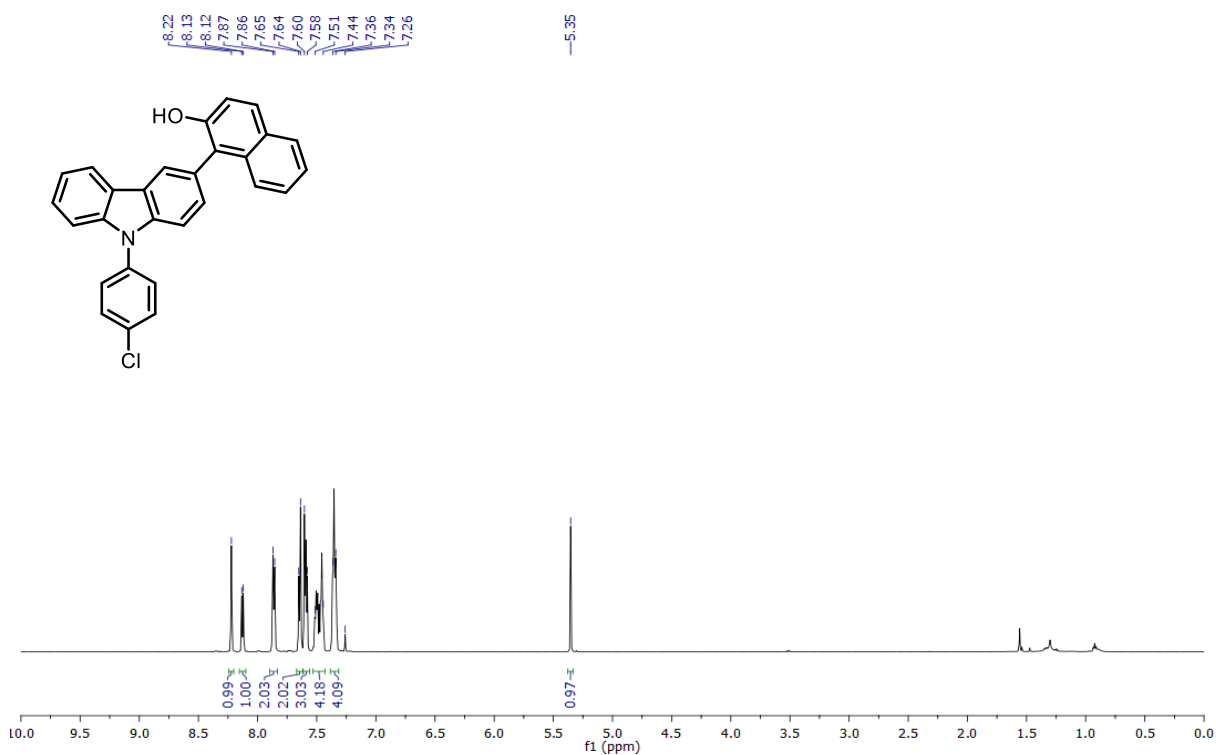

$^{13}\text{C NMR}$  (151 MHz, Chloroform-*d*)

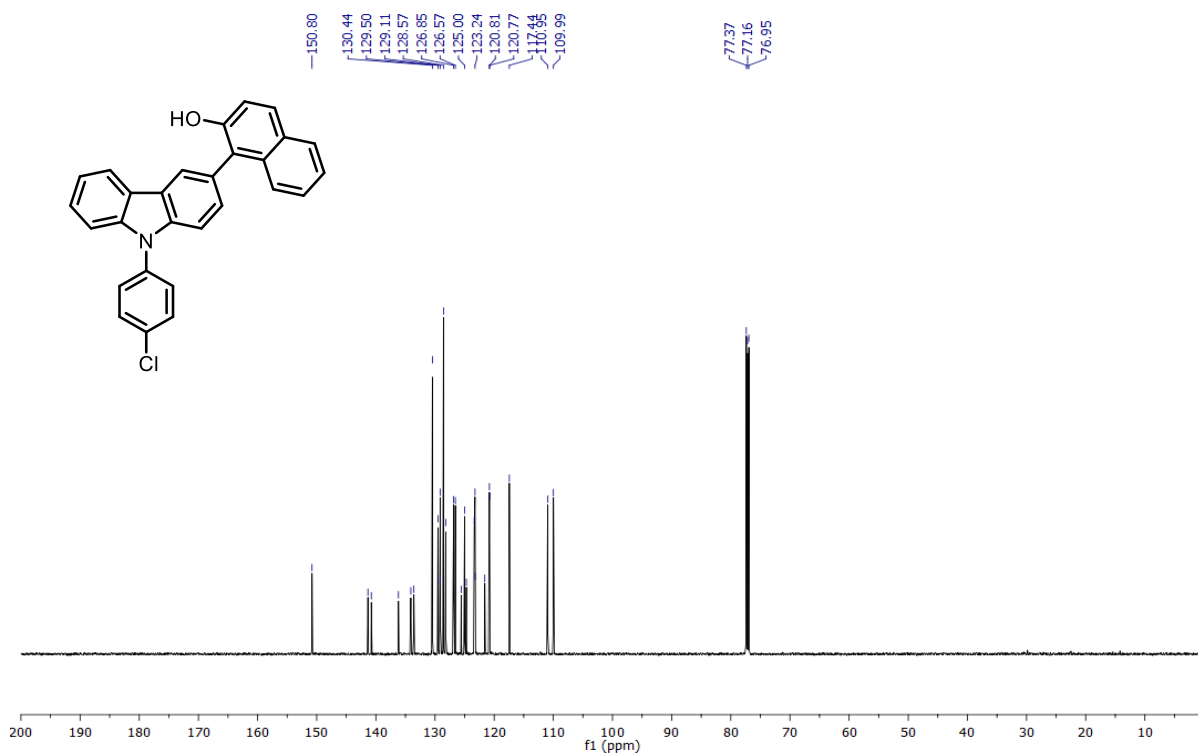

### 3-(3-(2-Hydroxynaphthalen-1-yl)-9H-carbazol-9-yl)benzonitrile (6g)

$^1\text{H}$  NMR (600 MHz, Chloroform-*d*)

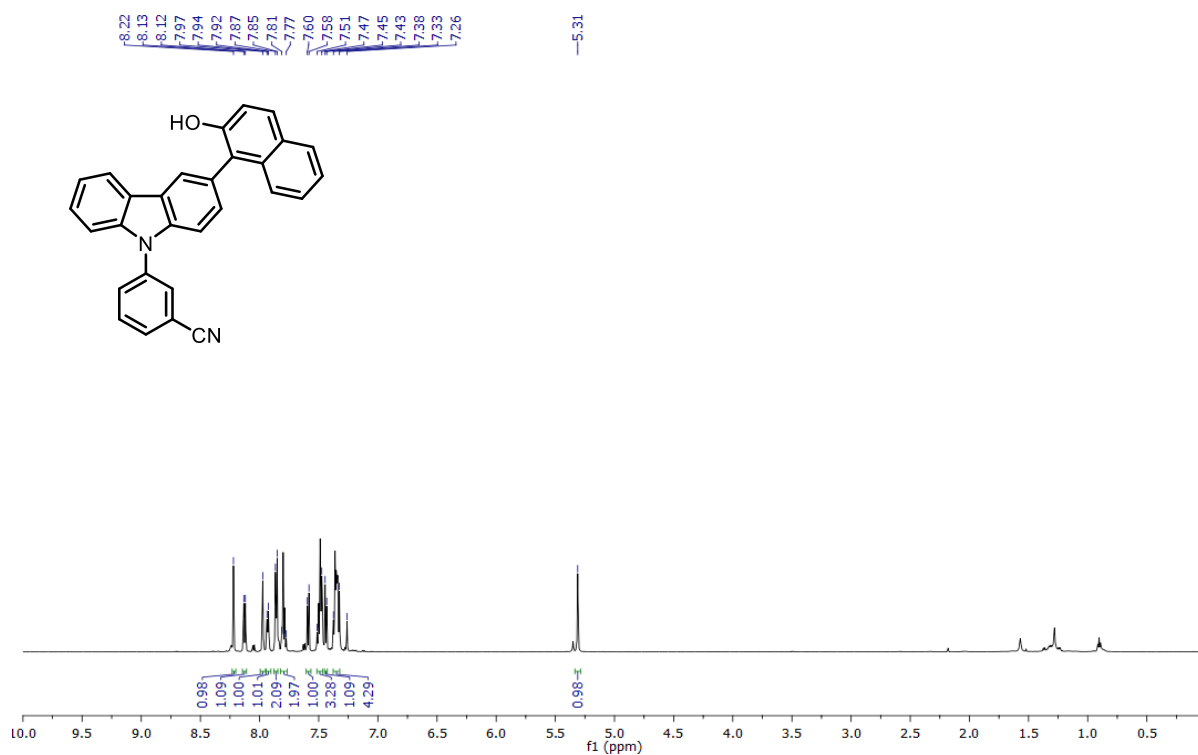

$^{13}\text{C}$  NMR (151 MHz, Chloroform-*d*)

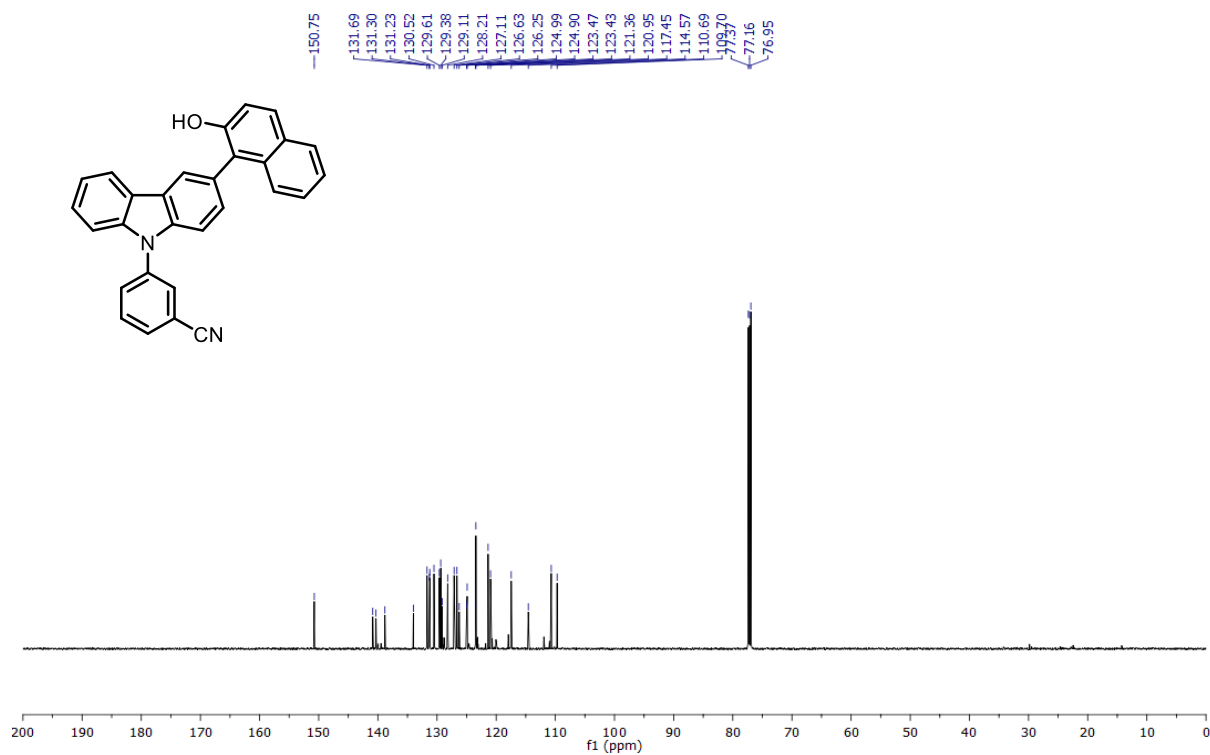

# 1-(6-Bromo-9-methyl-9H-carbazol-3-yl)naphthalen-2-ol (6h)

$^1\text{H}$  NMR (600 MHz, Chloroform-*d*)

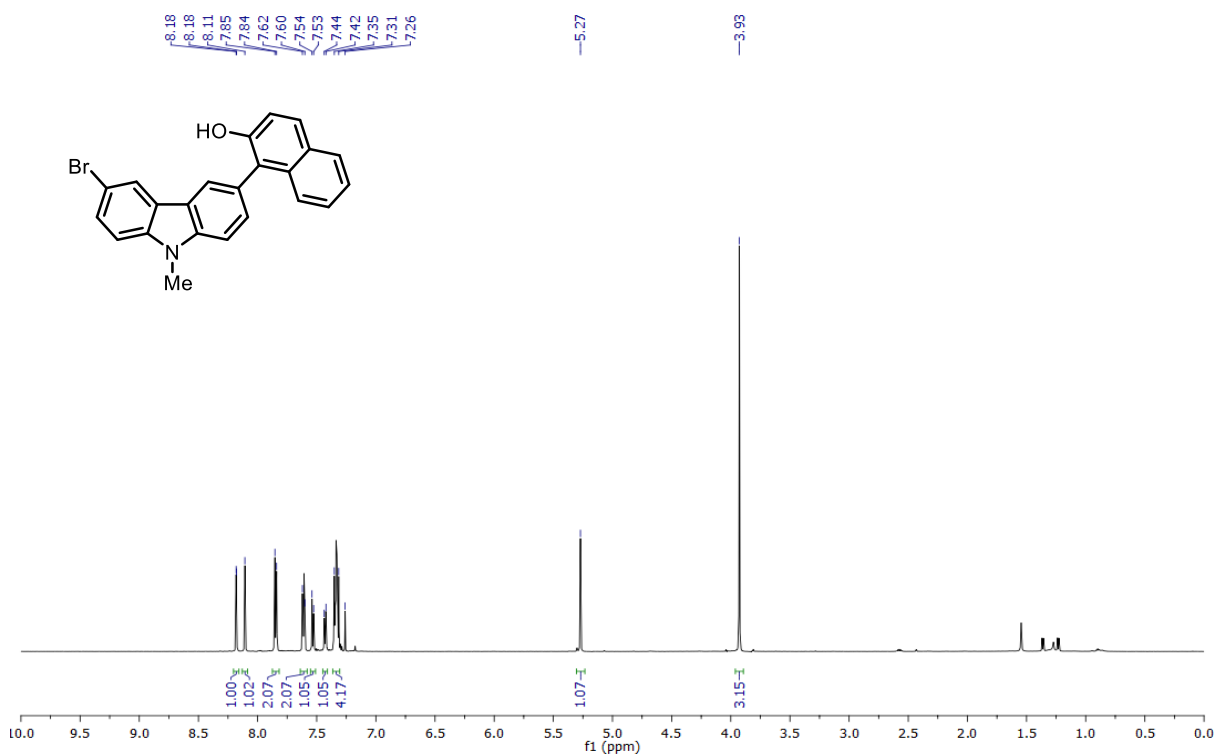

$^{13}\text{C}$  NMR (151 MHz, Chloroform-*d*)

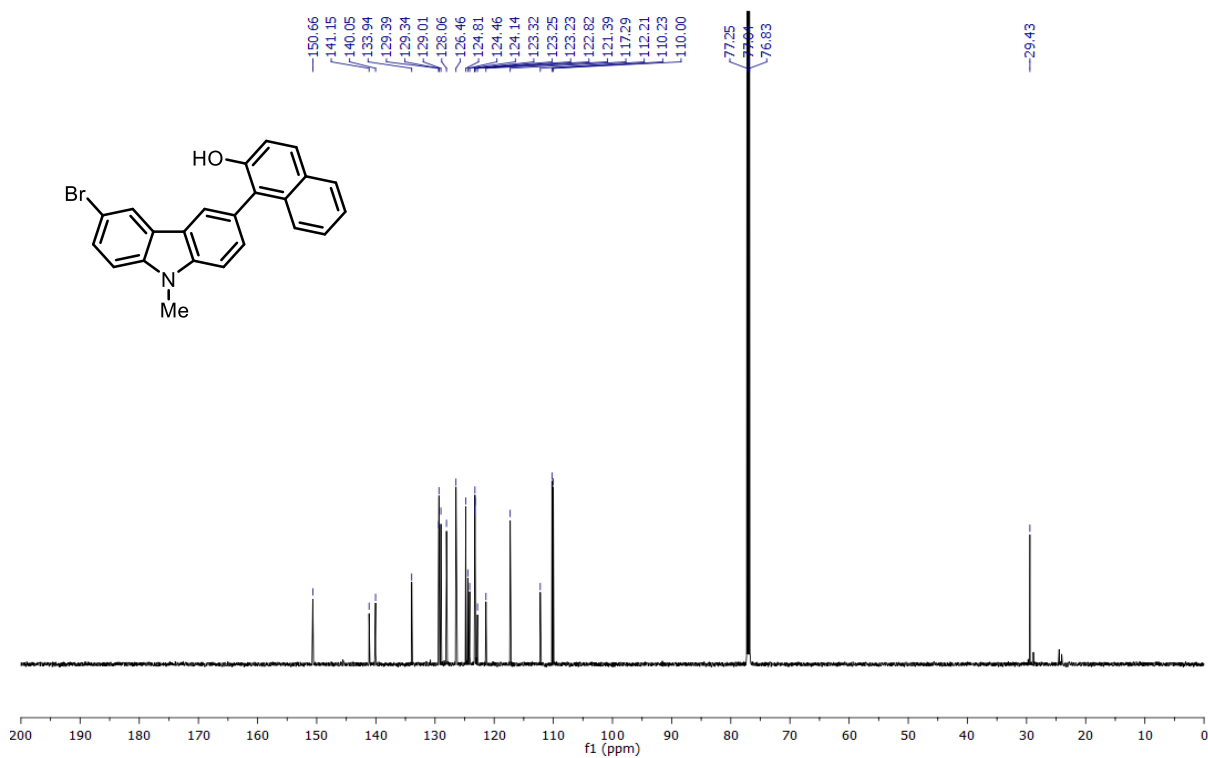



# 1-(9-Butyl-9H-carbazol-3-yl)naphthalen-2-ol (6i)

$^1\text{H}$  NMR (600 MHz, Chloroform-*d*)

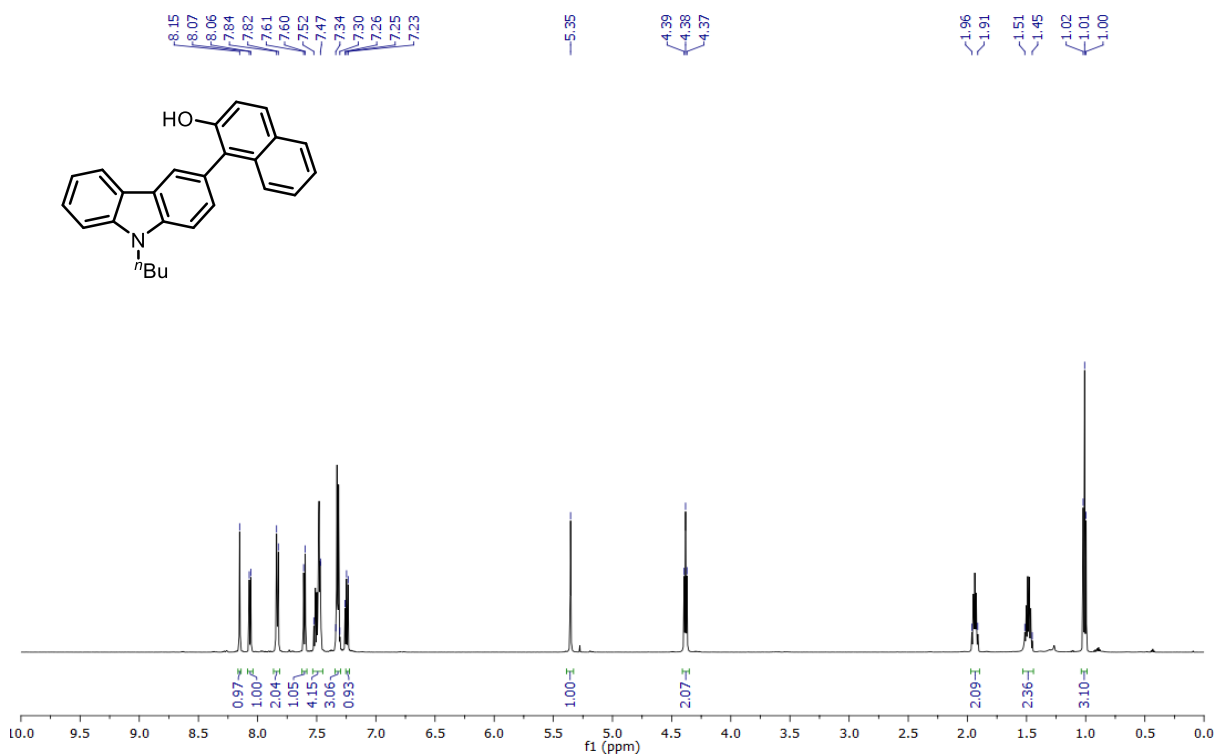

$^{13}\text{C}$  NMR (151 MHz, Chloroform-*d*)

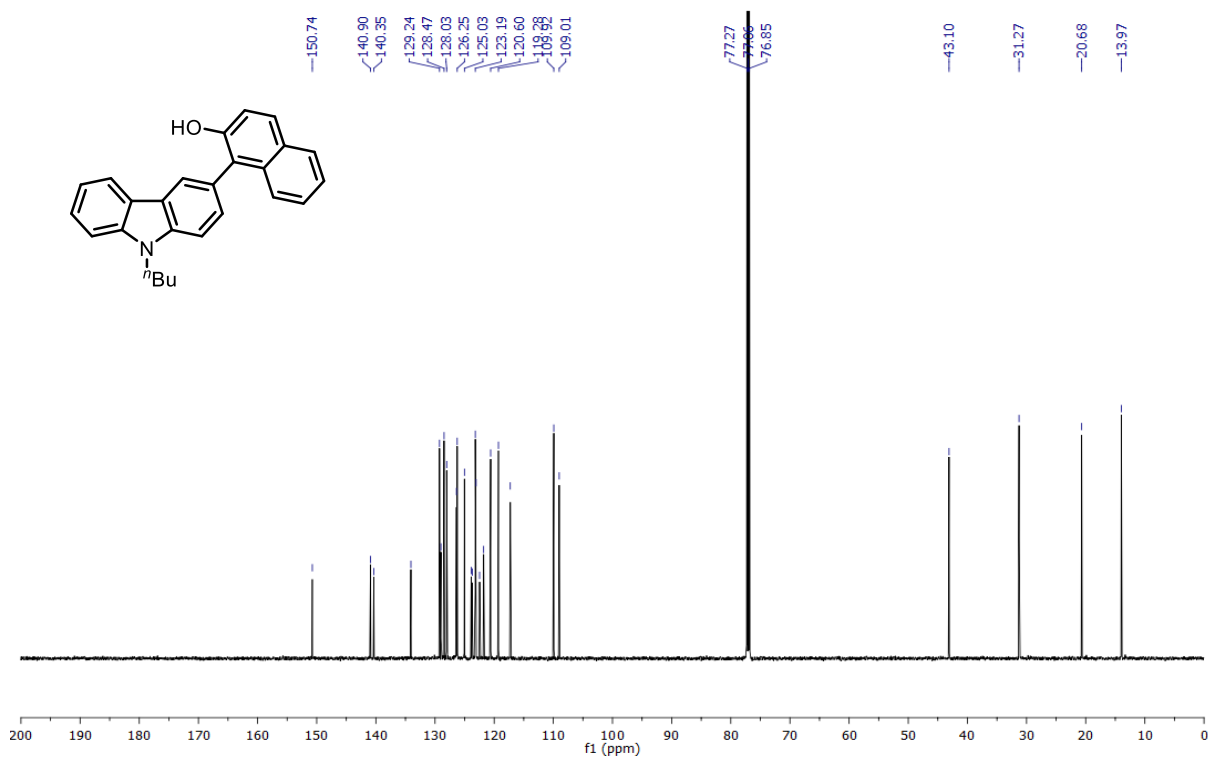

# Ethyl 2-(3-(2-hydroxynaphthalen-1-yl)-9H-carbazol-9-yl)acetate (6j)

$^1\text{H}$  NMR (600 MHz, Chloroform-*d*)

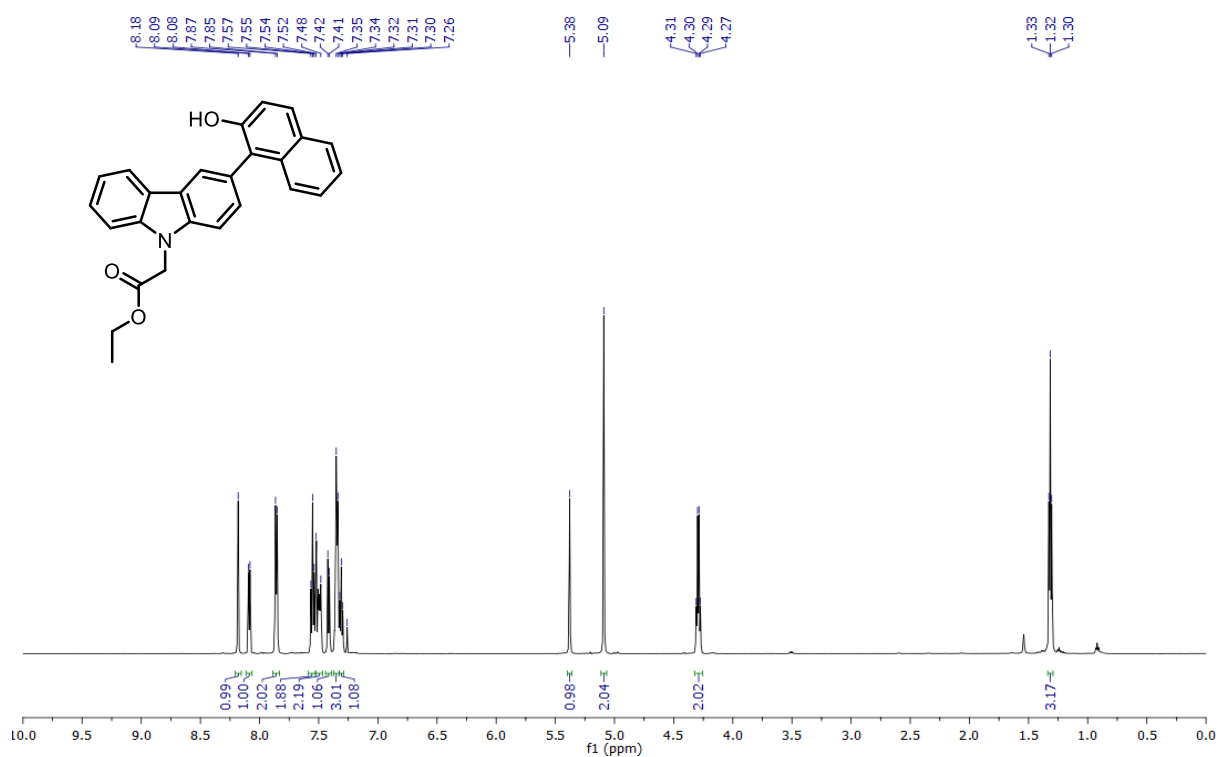

$^{13}\text{C}$  NMR (151 MHz, Chloroform-*d*)

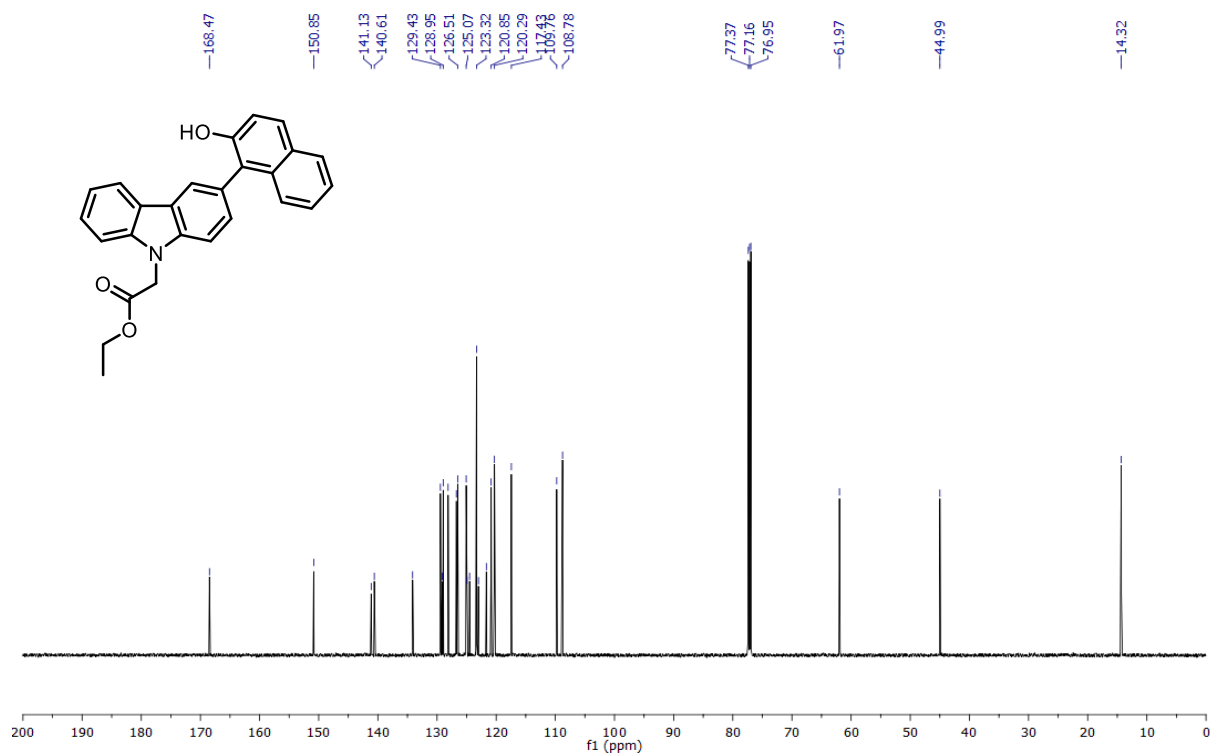

# 1-(9-Allyl-9H-carbazol-3-yl)naphthalen-2-ol (6k)

$^1\text{H}$  NMR (600 MHz, Chloroform-*d*)

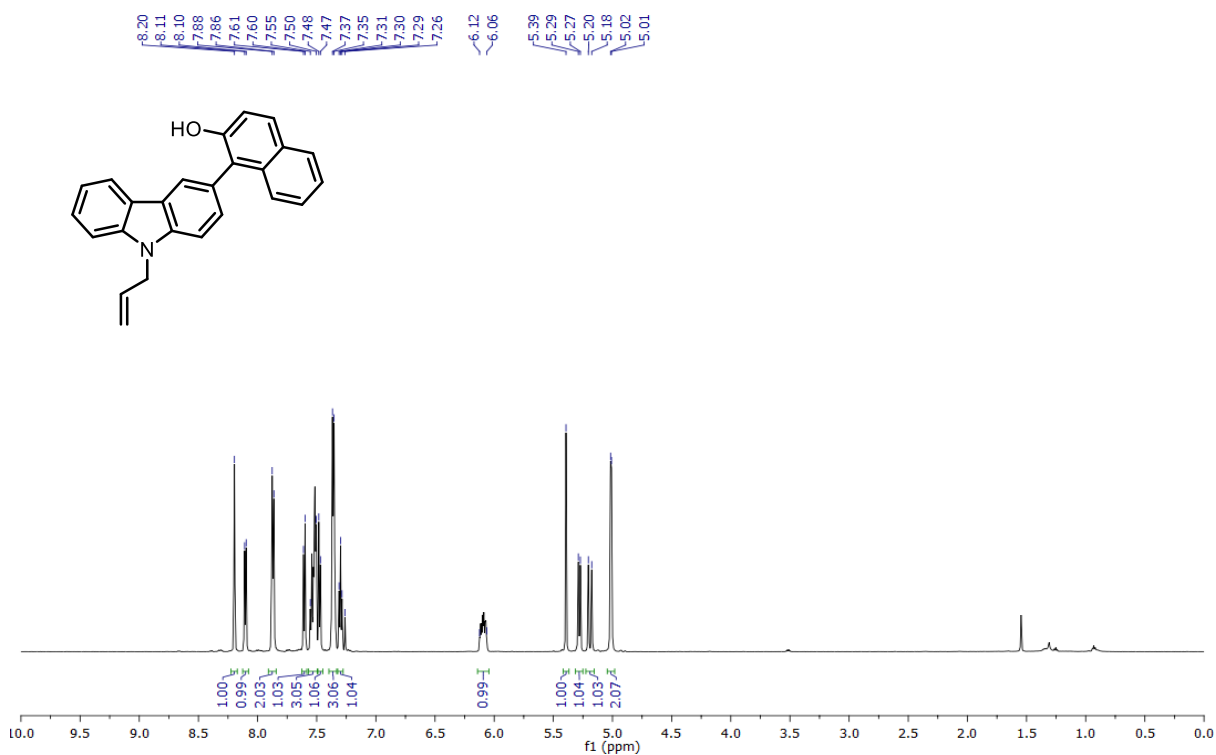

$^{13}\text{C}$  NMR (151 MHz, Chloroform-*d*)

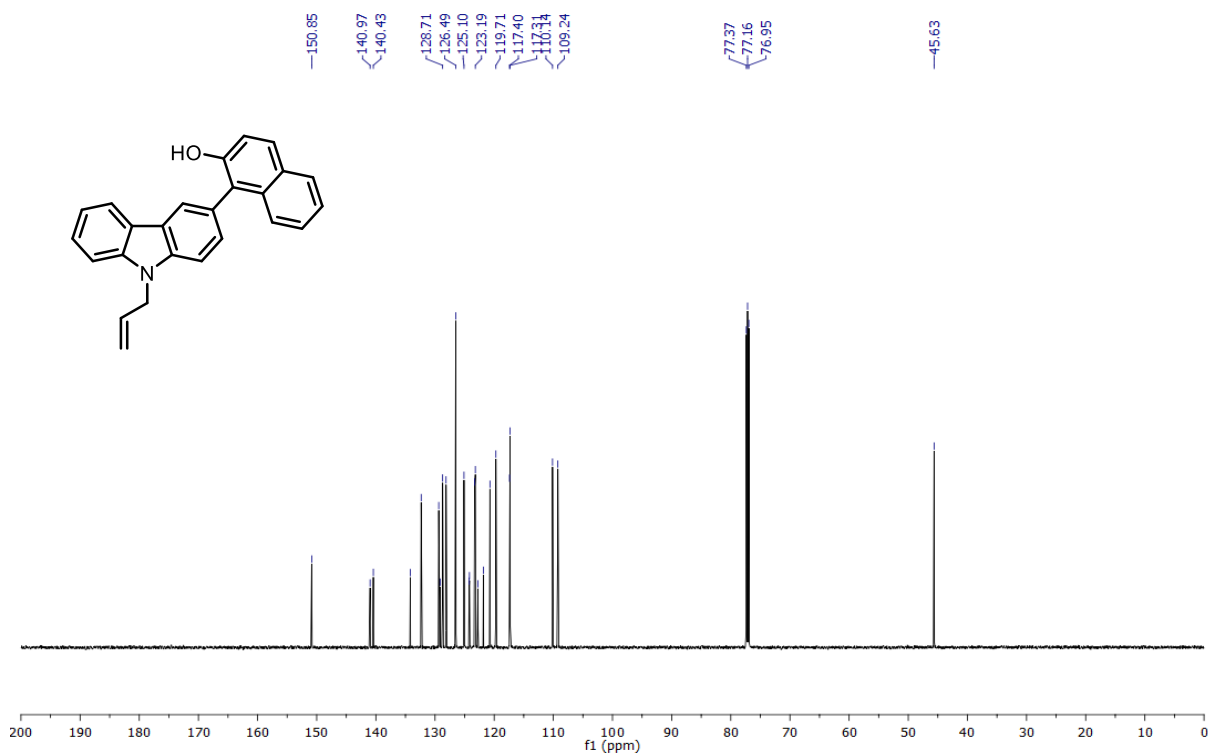

# 1-(9H-Carbazol-3-yl)-6-methoxynaphthalen-2-ol (6l)

<sup>1</sup>H NMR (600 MHz, Chloroform-*d*)

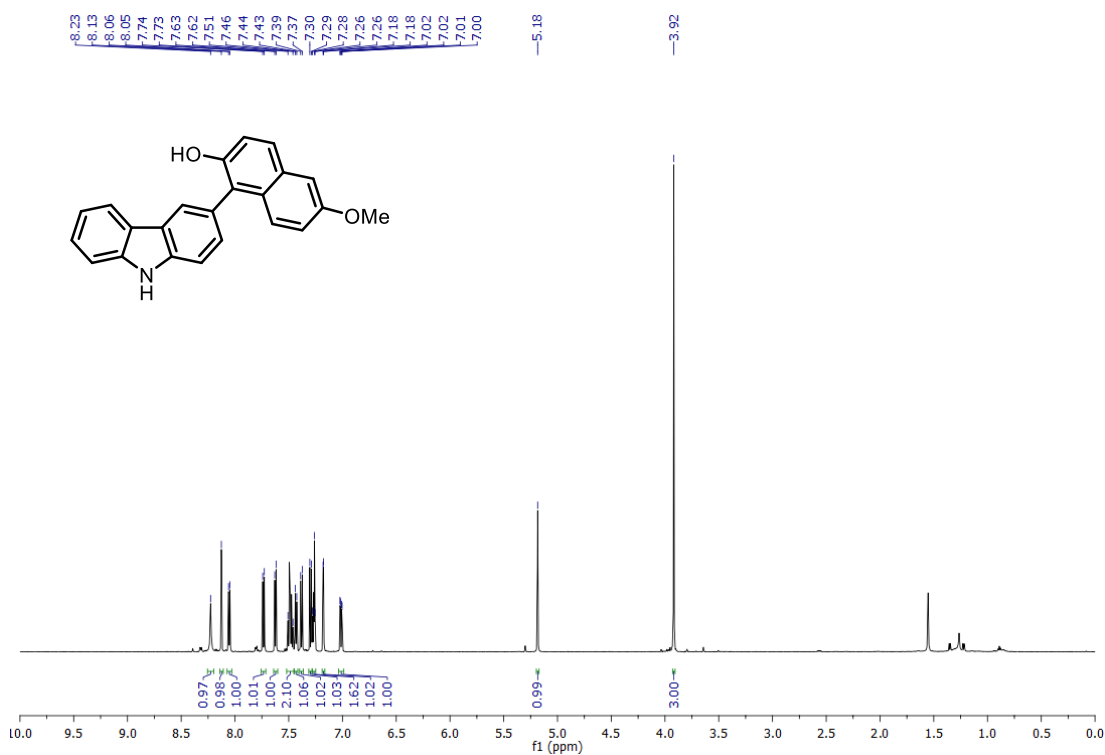

<sup>13</sup>C NMR (151 MHz, Chloroform-*d*)

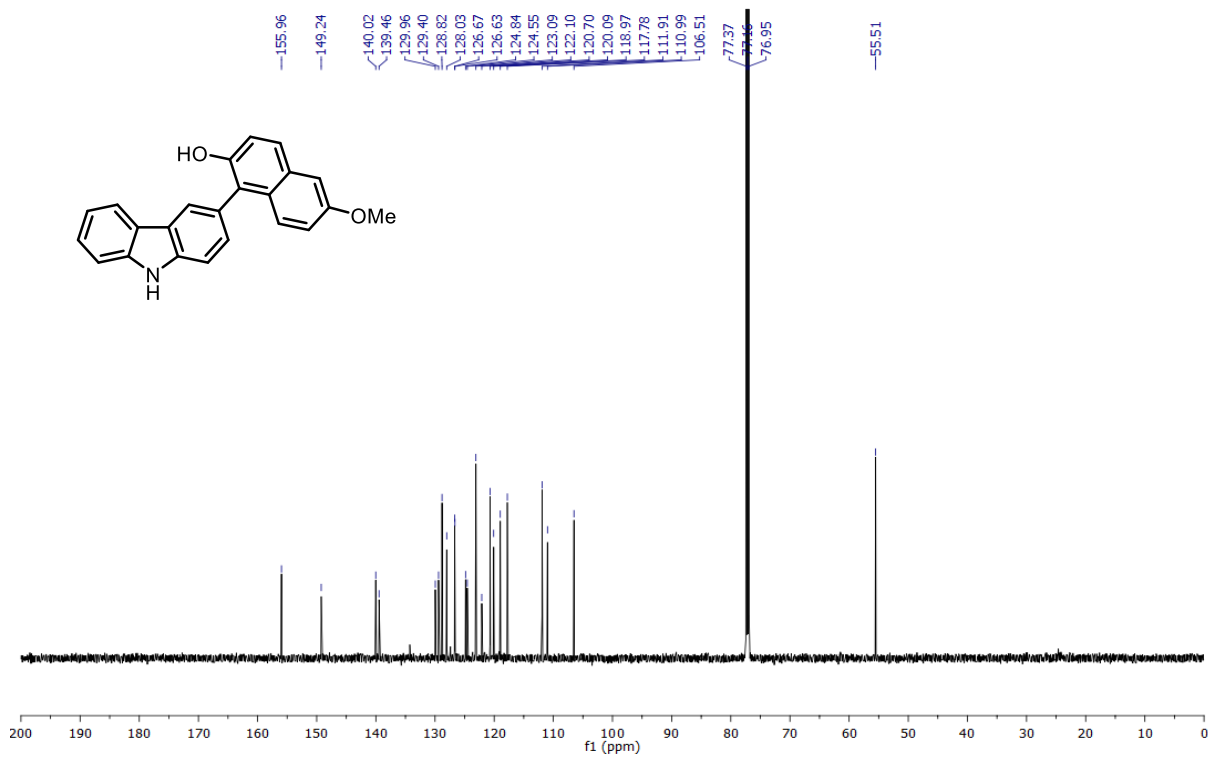

# 1-(9H-Carbazol-3-yl)-7-methoxynaphthalen-2-ol (6m)

<sup>1</sup>H NMR (600 MHz, Chloroform-*d*)

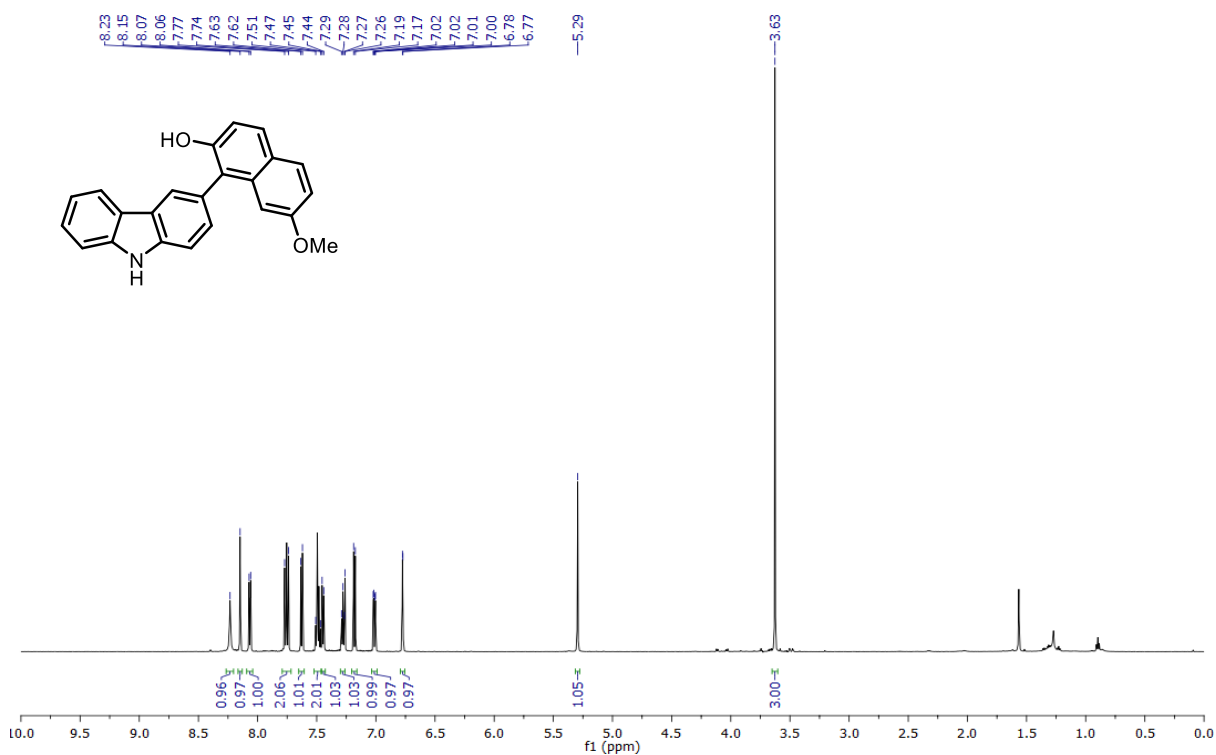

<sup>13</sup>C NMR (151 MHz, Chloroform-*d*)

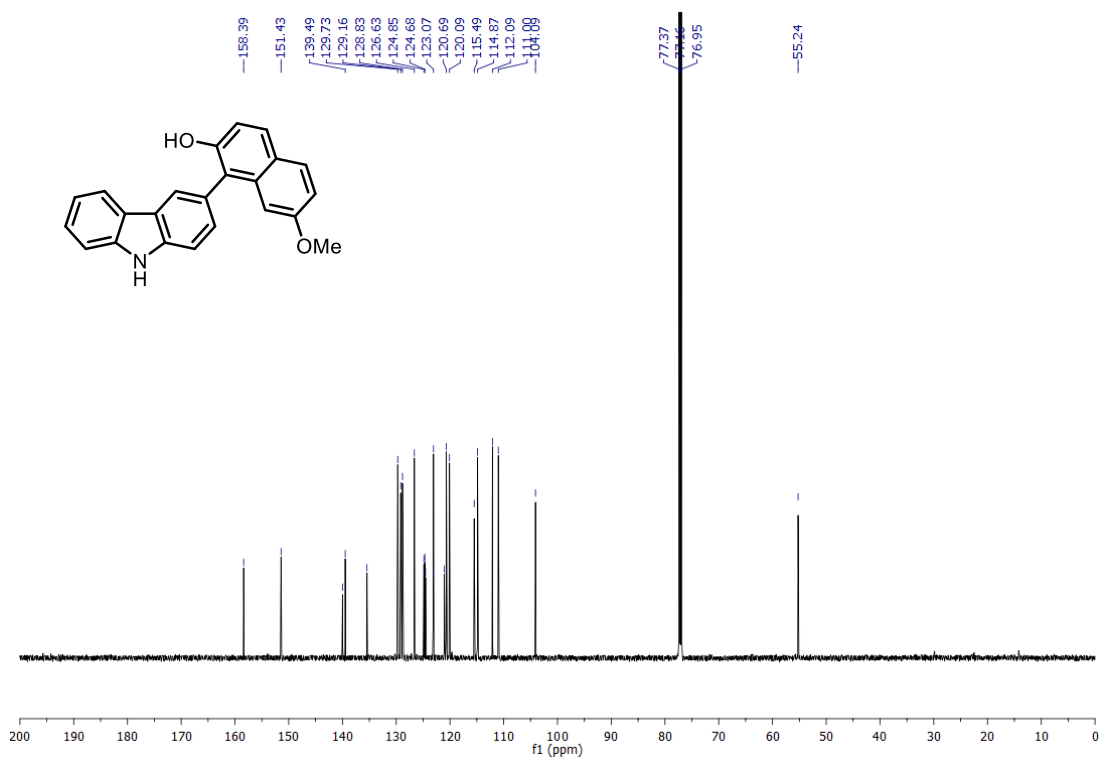

## 7-Bromo-1-(9H-carbazol-3-yl)naphthalen-2-ol (6n)

$^1\text{H}$  NMR (600 MHz, Chloroform-*d*)

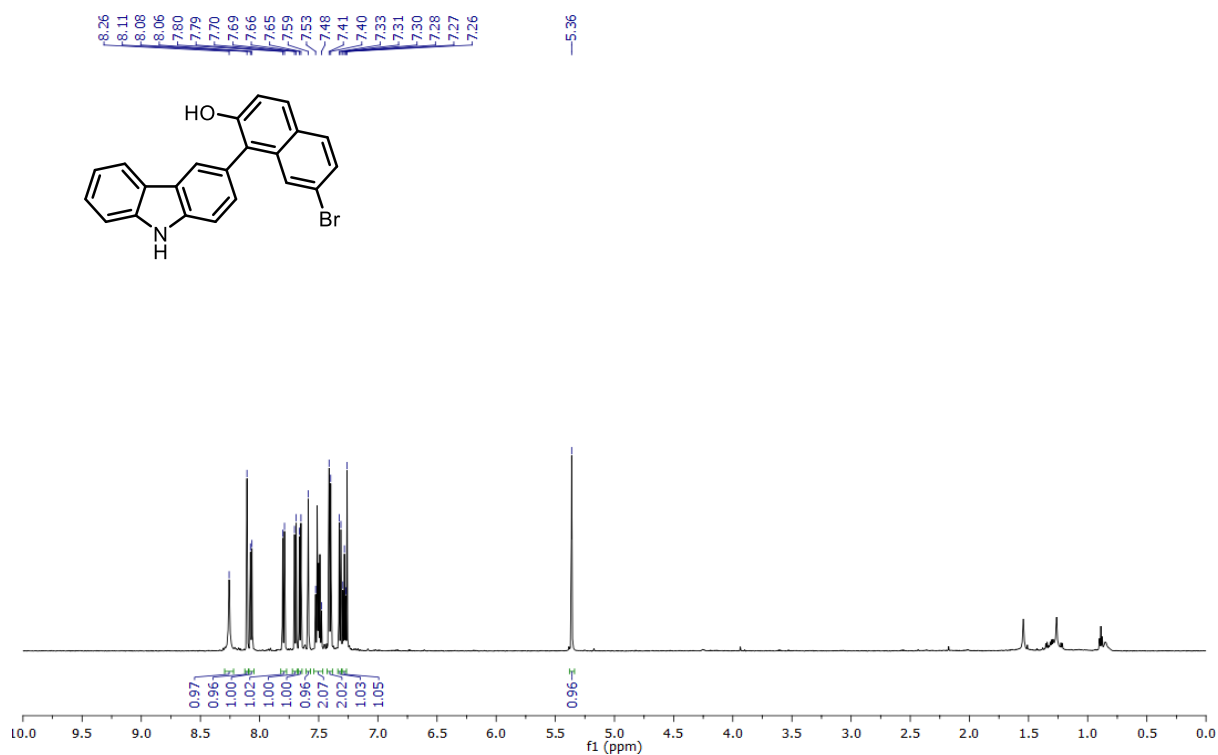

$^{13}\text{C}$  NMR (151 MHz, Chloroform-*d*)

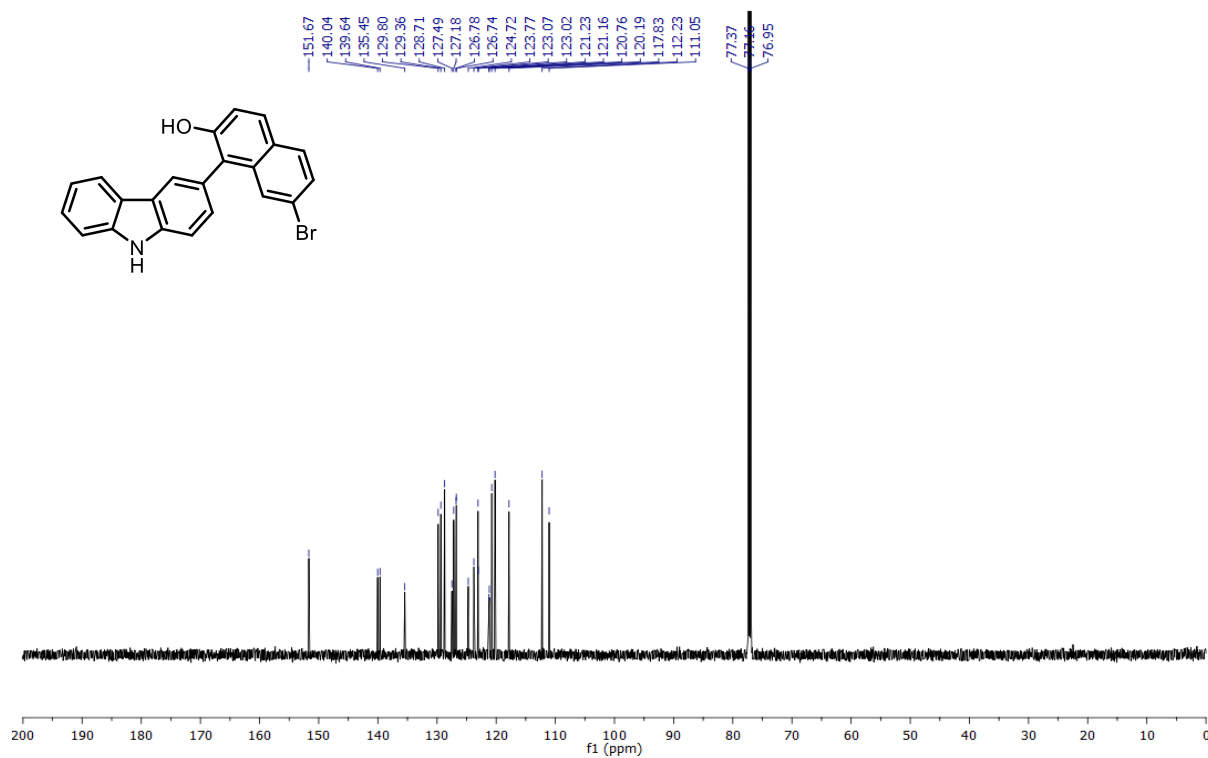

## 6-Bromo-1-(9H-carbazol-3-yl)naphthalen-2-ol (6o)

$^1\text{H}$  NMR (400 MHz, Chloroform-*d*)

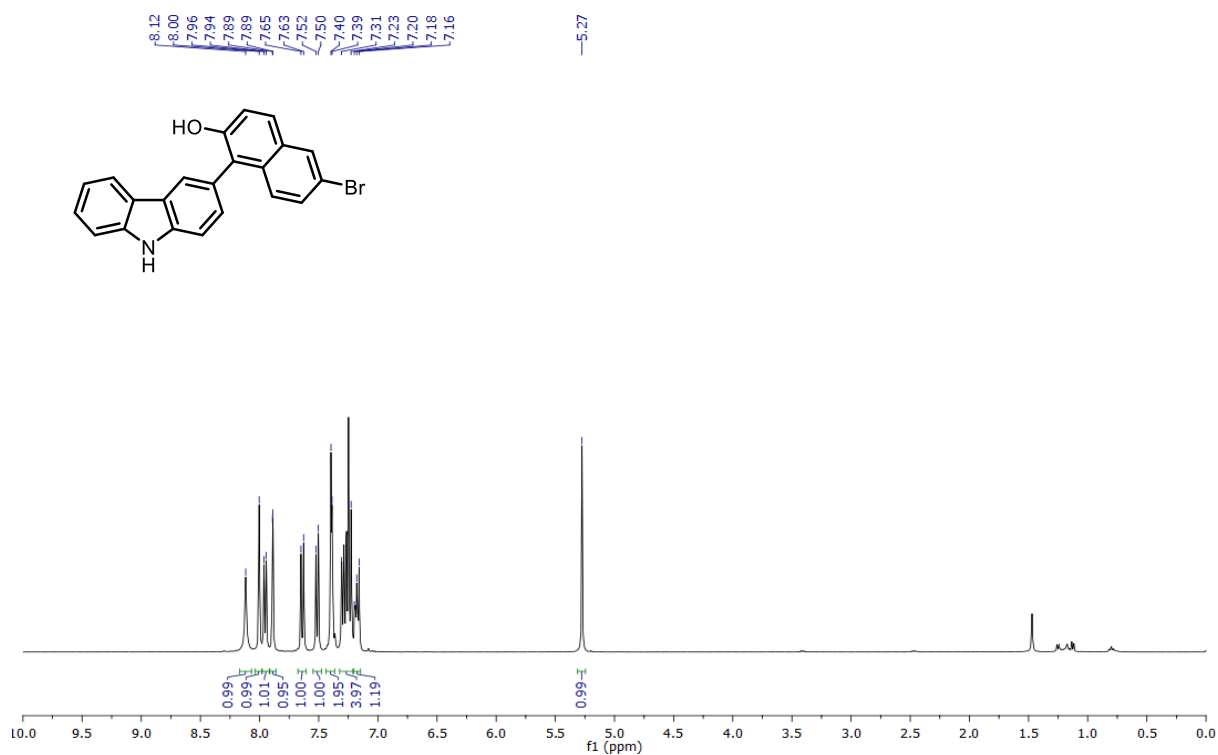

$^{13}\text{C}$  NMR (101 MHz, Chloroform-*d*)

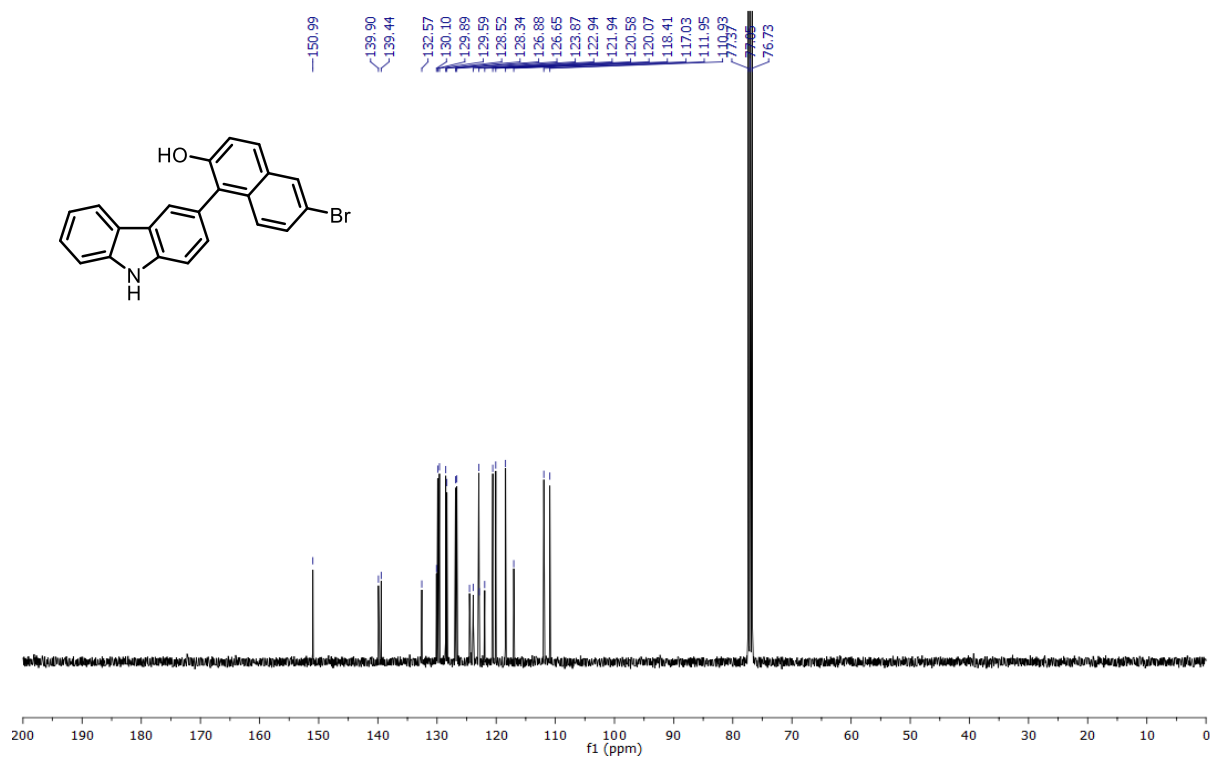

### 3-Bromo-1-(9H-carbazol-3-yl)naphthalen-2-ol (6p)

$^1\text{H}$  NMR (600 MHz, Chloroform-*d*)

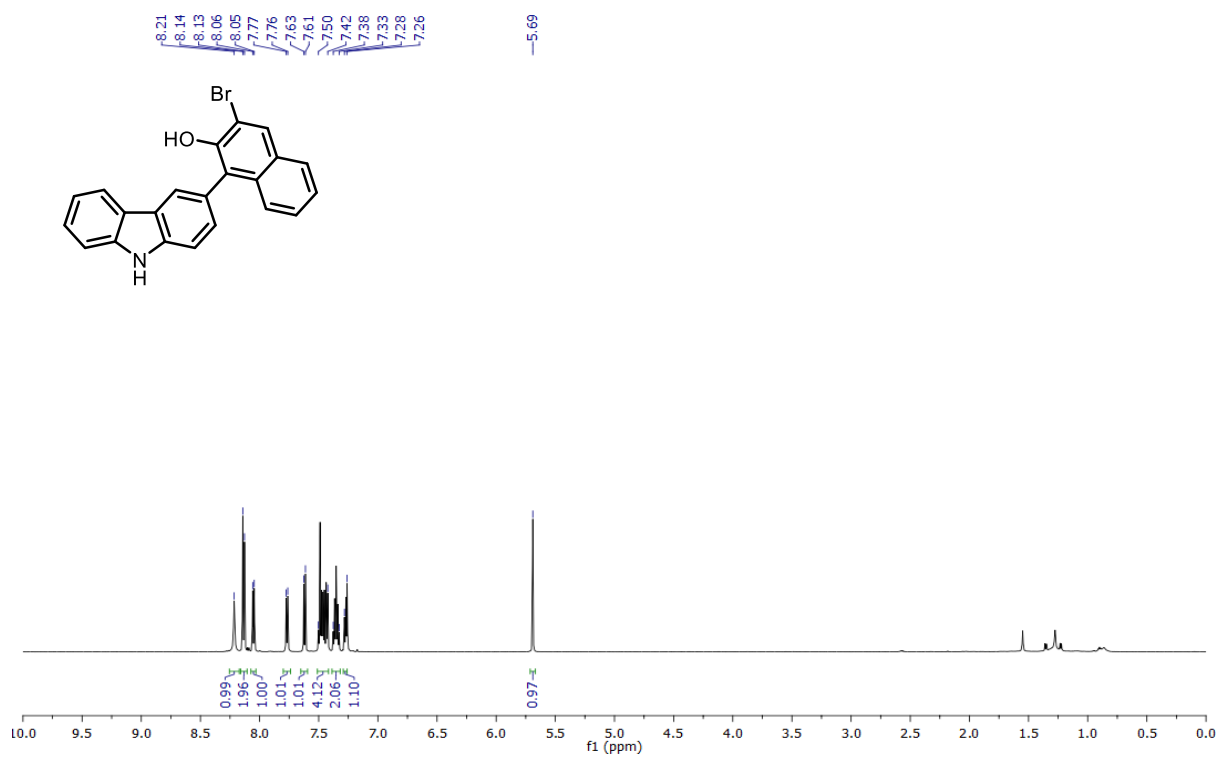

$^{13}\text{C}$  NMR (151 MHz, Chloroform-*d*)

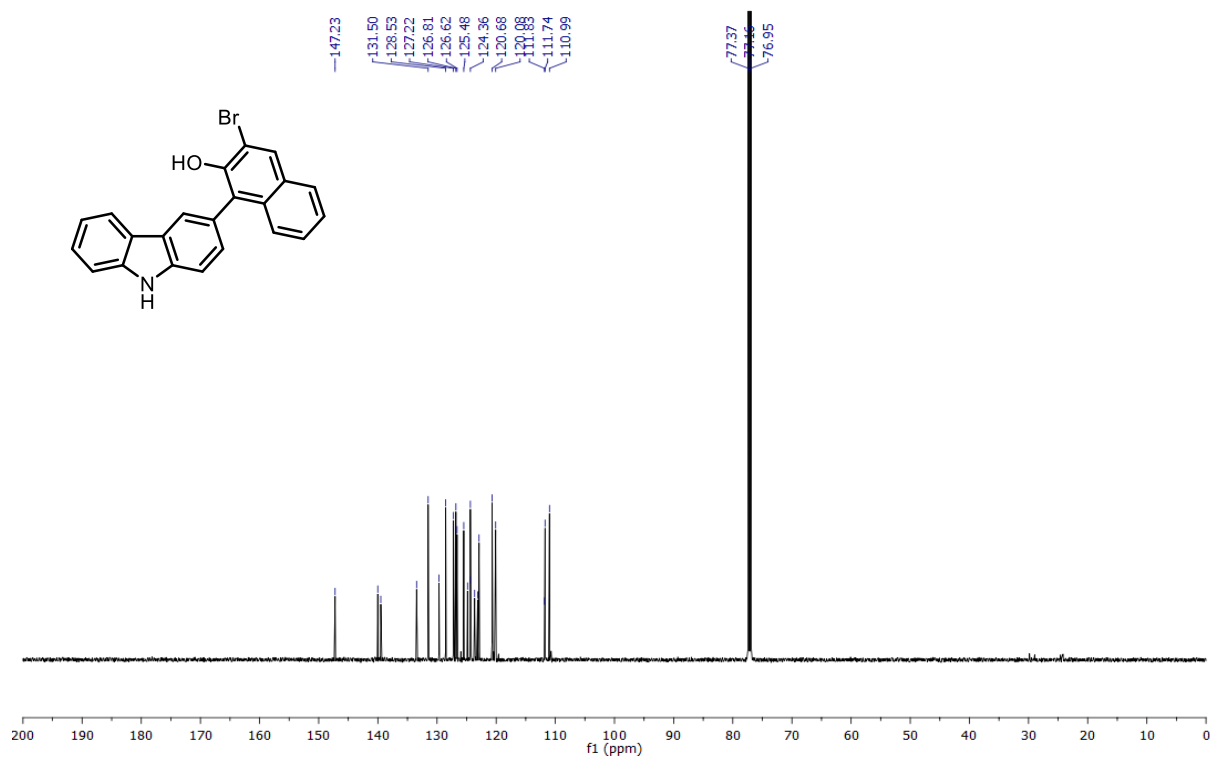



### 5-(9H-Carbazol-3-yl)-6-hydroxynaphthalen-2-yl acetate (6q)

$^1\text{H}$  NMR (600 MHz, Chloroform-*d*)

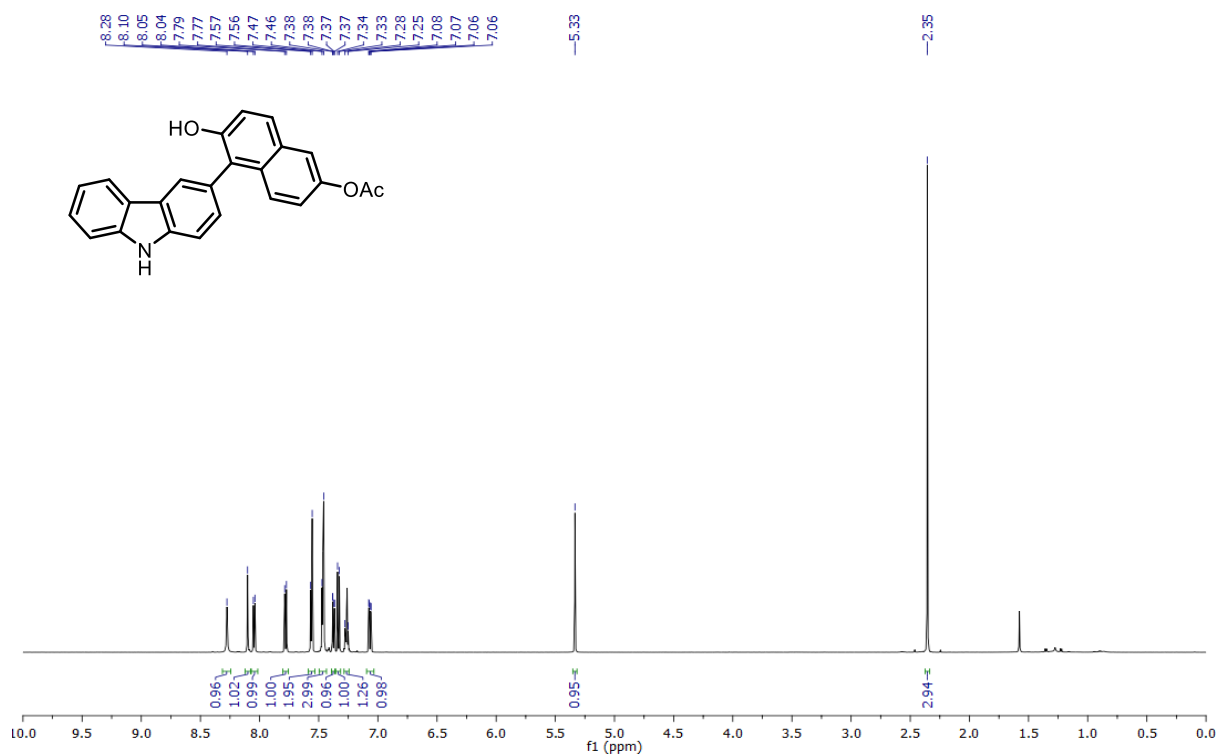

$^{13}\text{C}$  NMR (151 MHz, Chloroform-*d*)

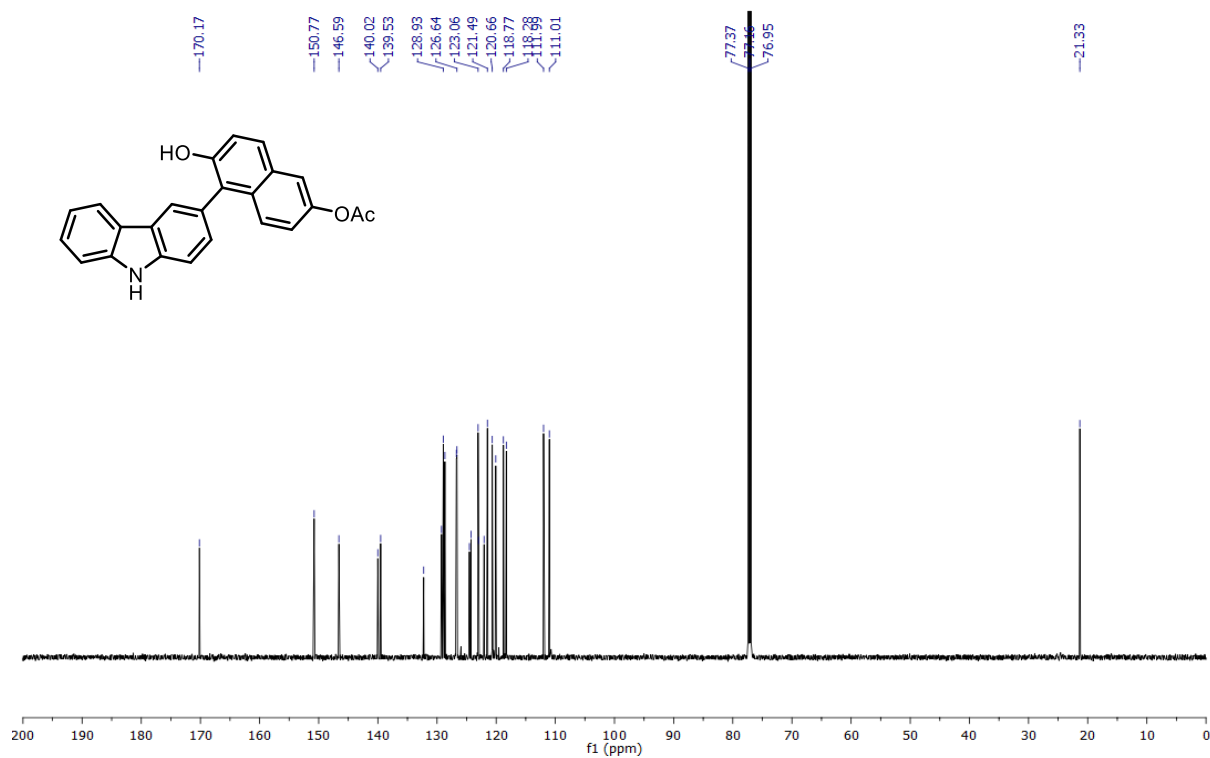

# 10-(9H-Carbazol-3-yl)phenanthren-9-ol (6r)

<sup>1</sup>H NMR (600 MHz, Chloroform-*d*)

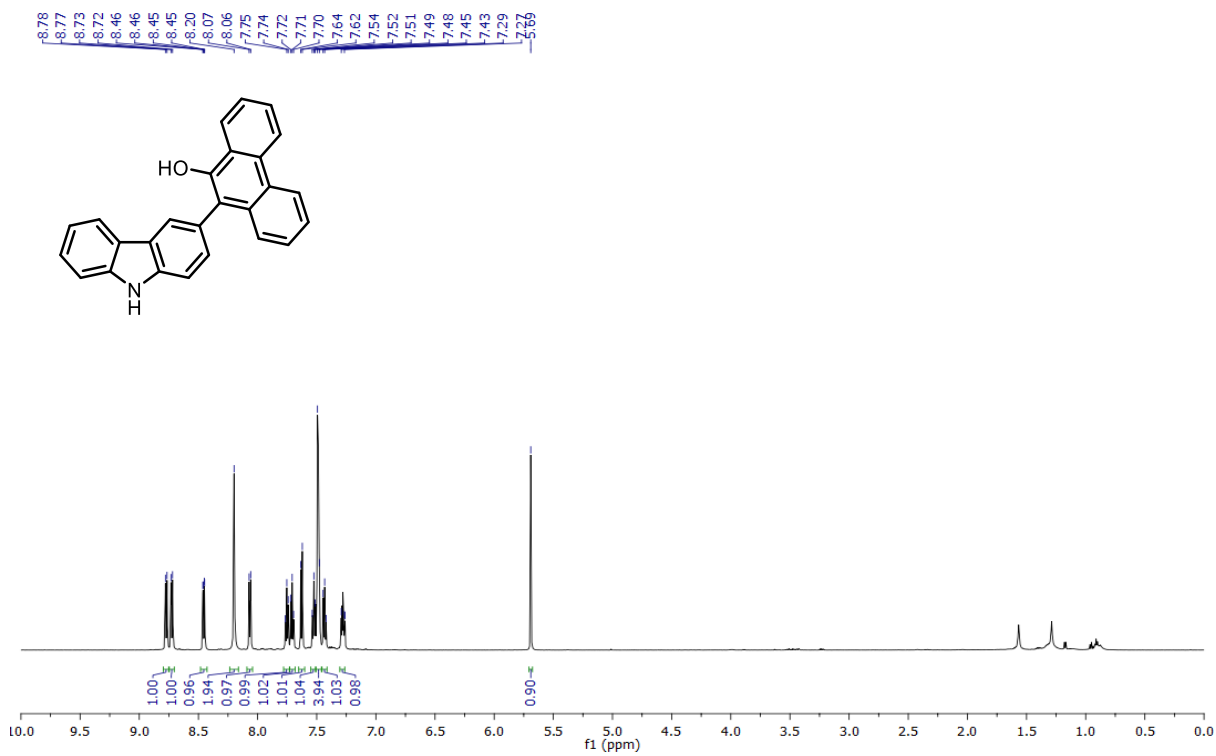

<sup>13</sup>C NMR (151 MHz, Chloroform-*d*)

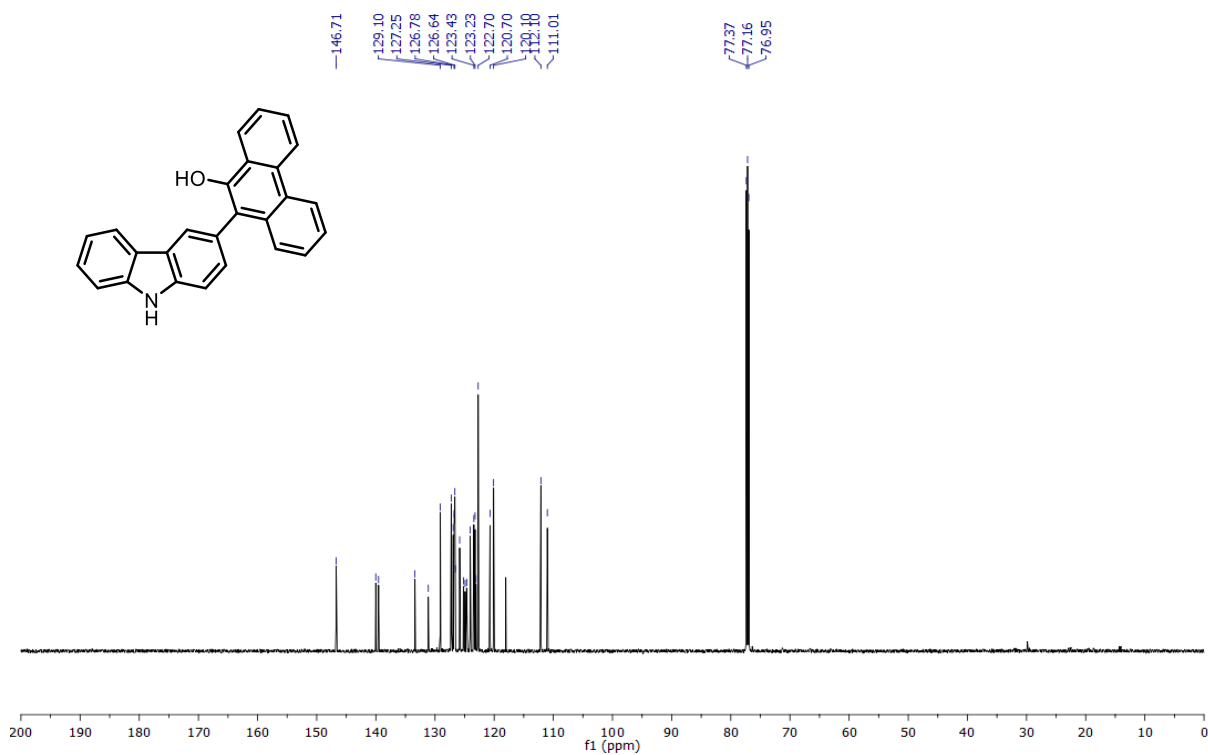

# 1-(9H-Carbazol-9-yl)naphthalen-2-ol (7a)

<sup>1</sup>H NMR (600 MHz, Chloroform-*d*)

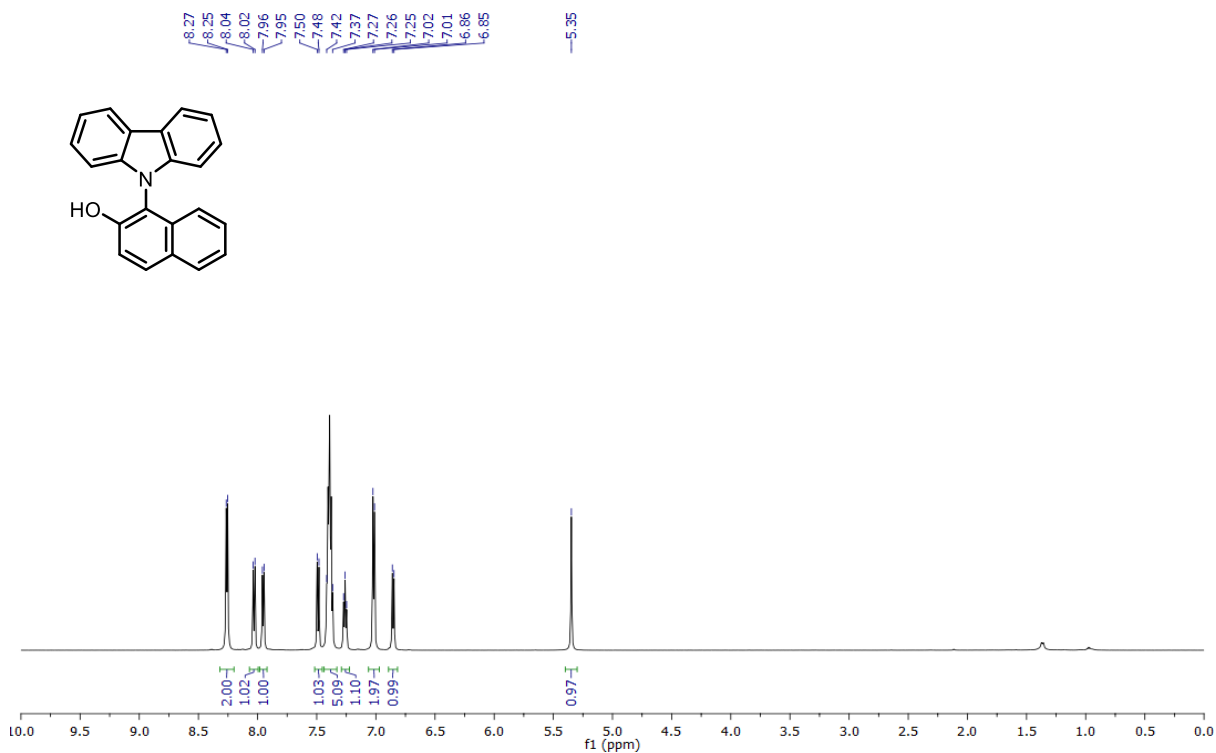

<sup>13</sup>C NMR (151 MHz, Chloroform-*d*)

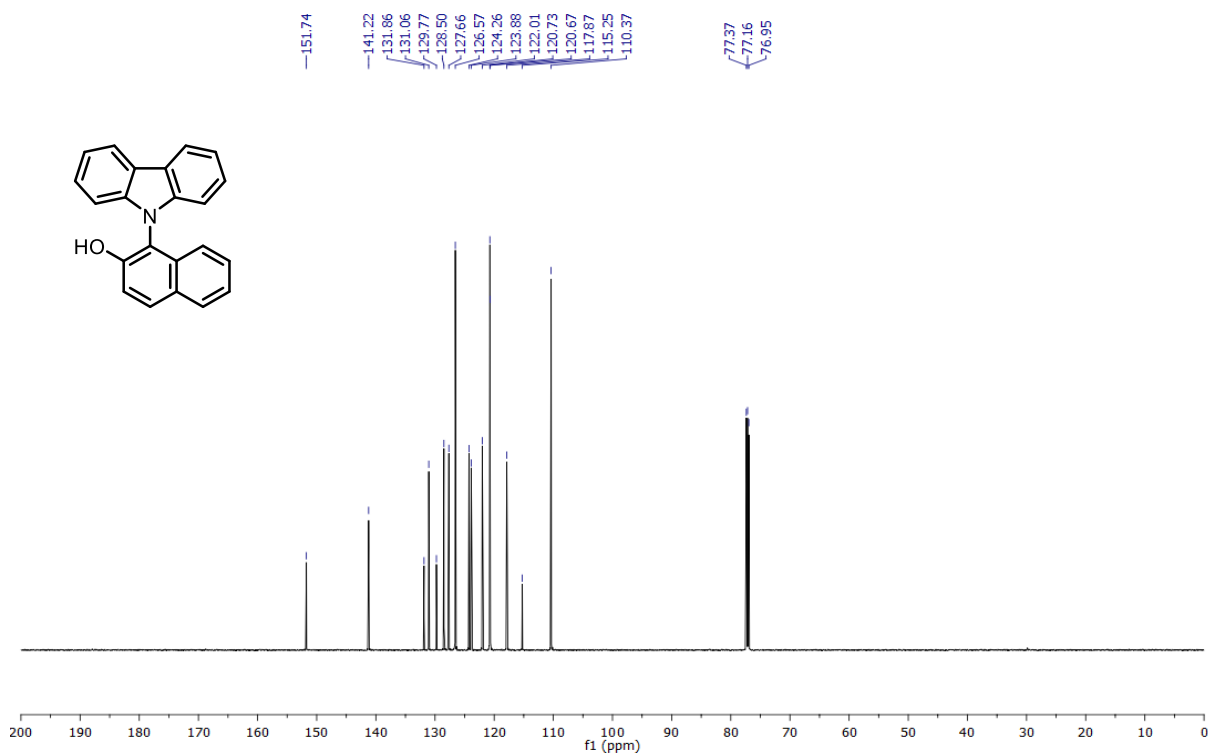

## 11-(3-Fluoro-9*H*-carbazol-9-yl)naphthalen-2-ol (7b)

$^1\text{H}$  NMR (400 MHz, Chloroform-*d*)

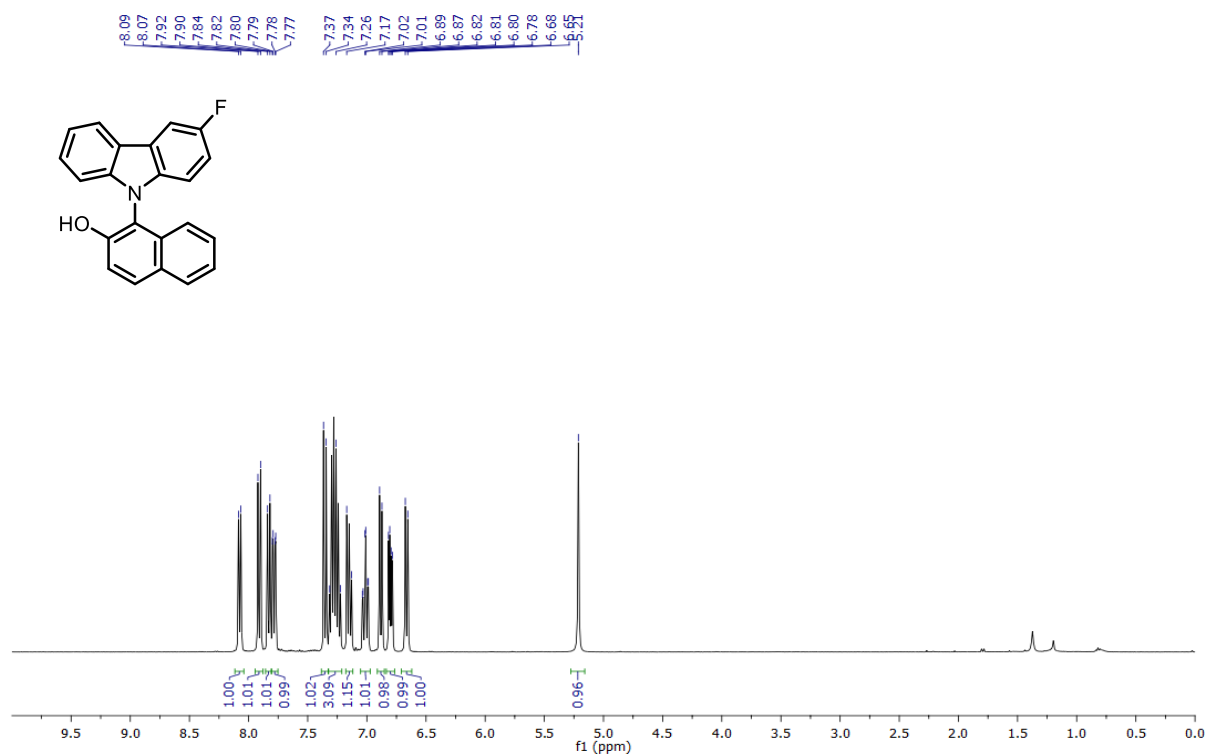

$^{13}\text{C}$  NMR (101 MHz, Chloroform-*d*)

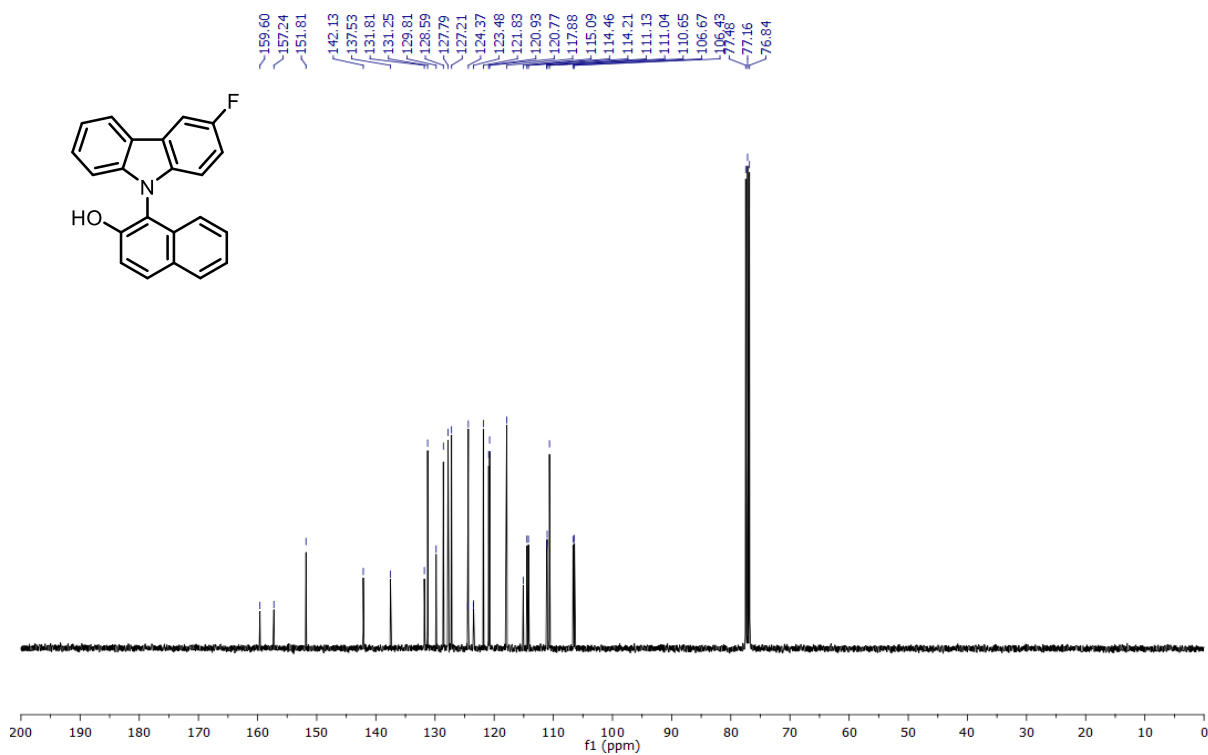

<sup>19</sup>F NMR (565 MHz, Chloroform-*d*)

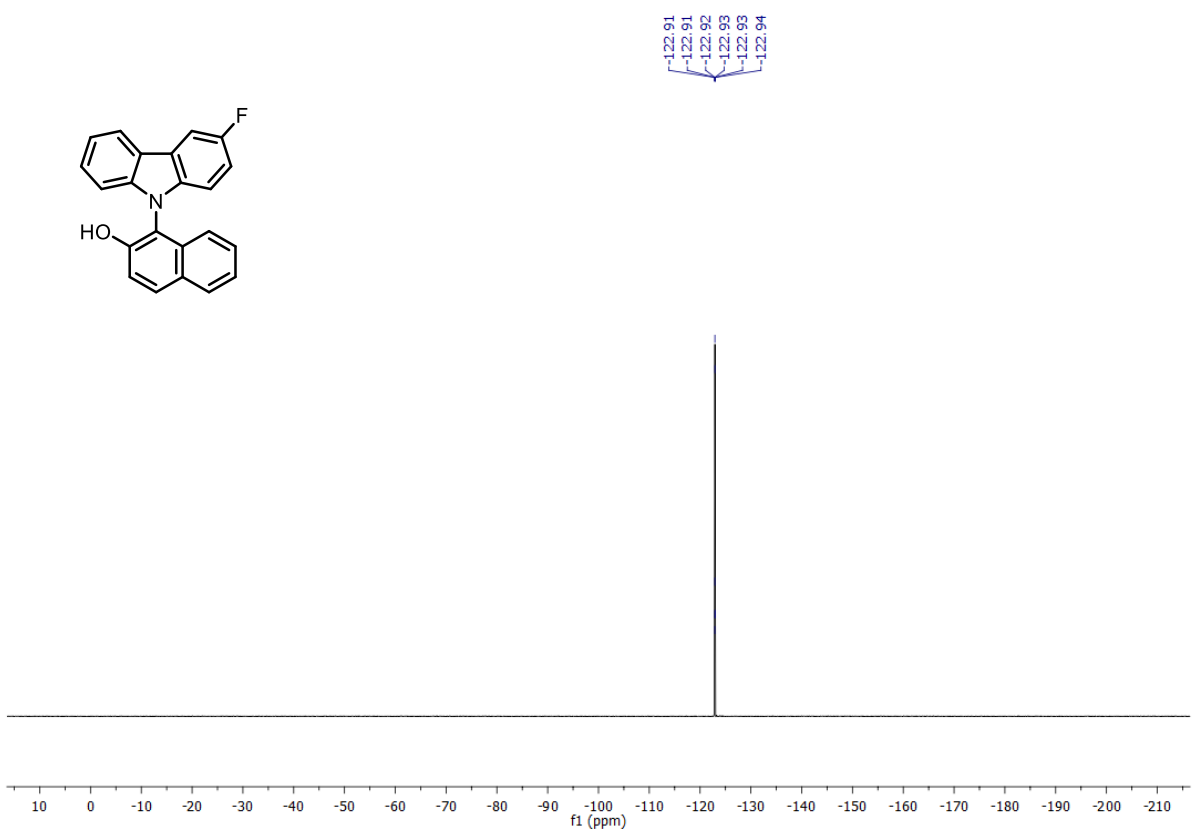

# 1-(3-Ethyl-9H-carbazol-9-yl)naphthalen-2-ol (7c)

$^1\text{H}$  NMR (400 MHz, Chloroform-*d*)

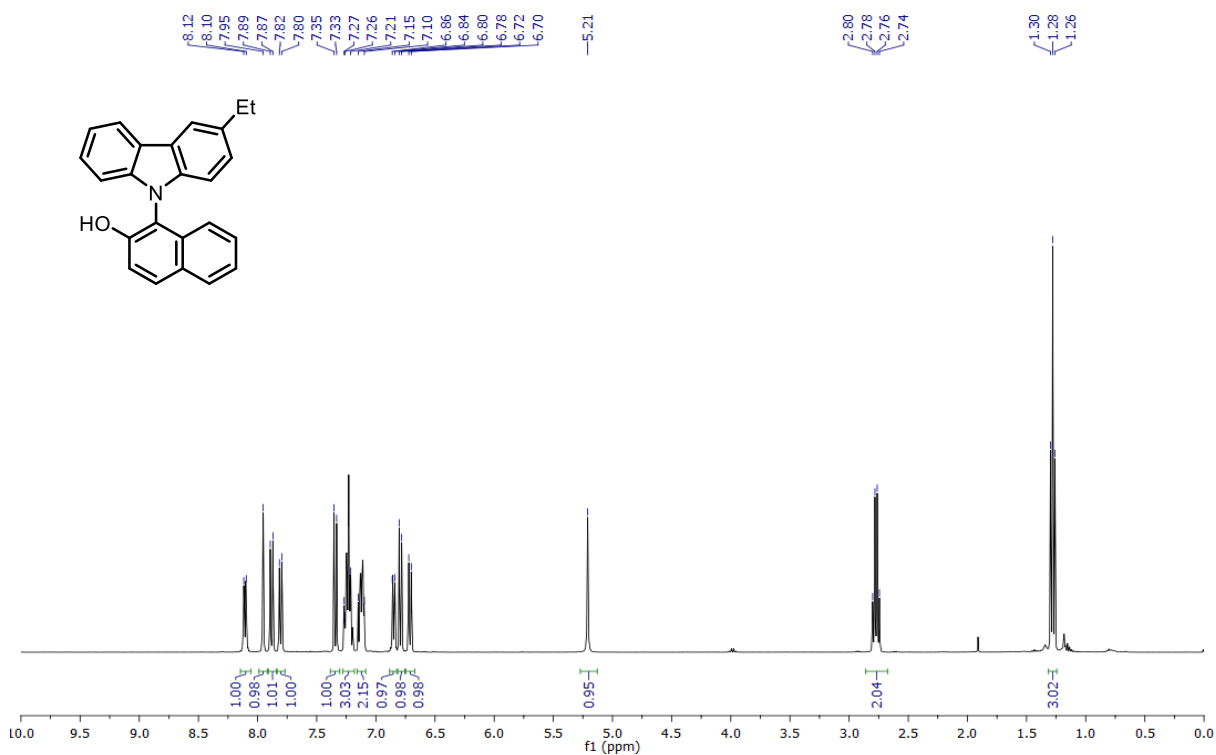

$^{13}\text{C}$  NMR (101 MHz, Chloroform-*d*)

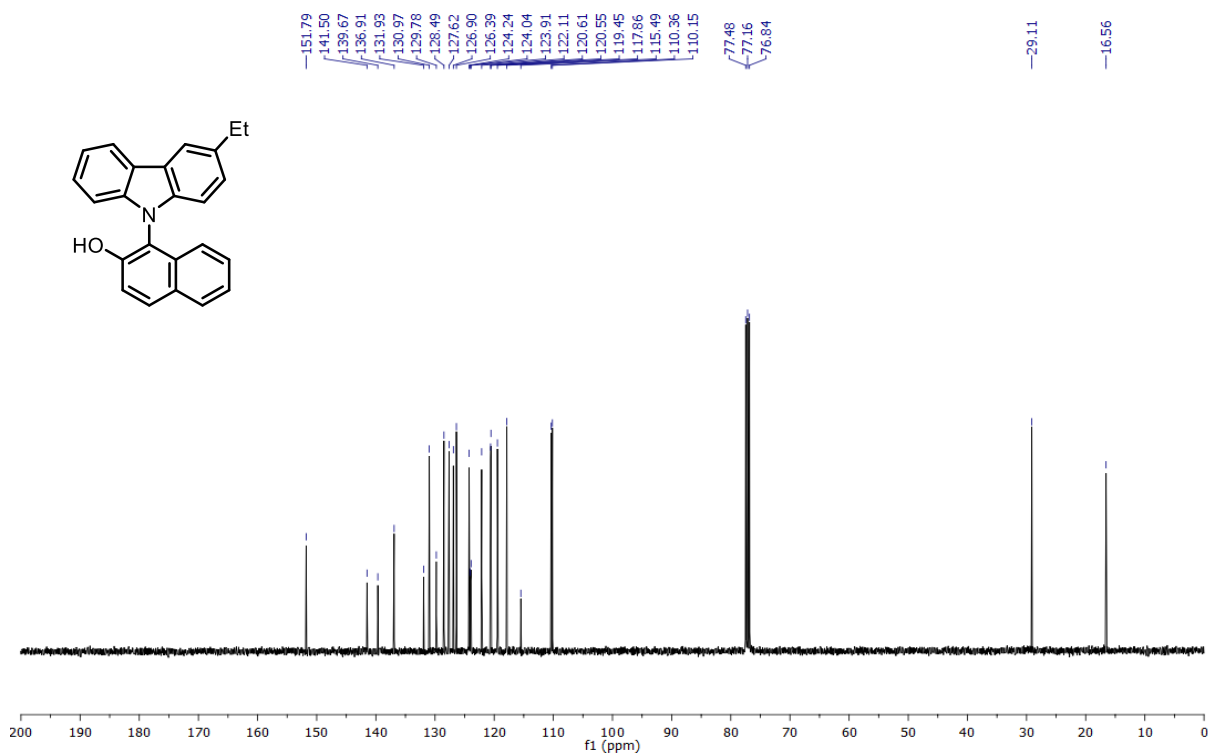

# 1-(2-Chloro-9H-carbazol-9-yl)naphthalen-2-ol (7d)

$^1\text{H}$  NMR (600 MHz, Chloroform-*d*)

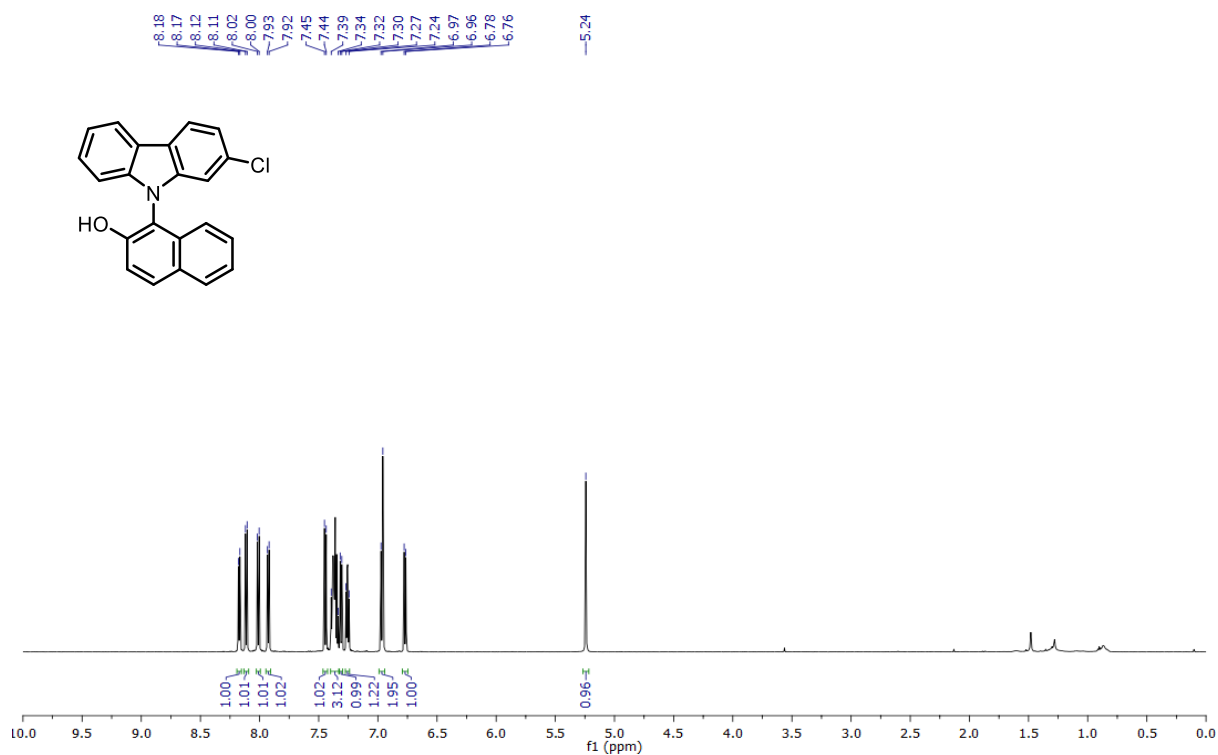

$^{13}\text{C}$  NMR (151 MHz, Chloroform-*d*)

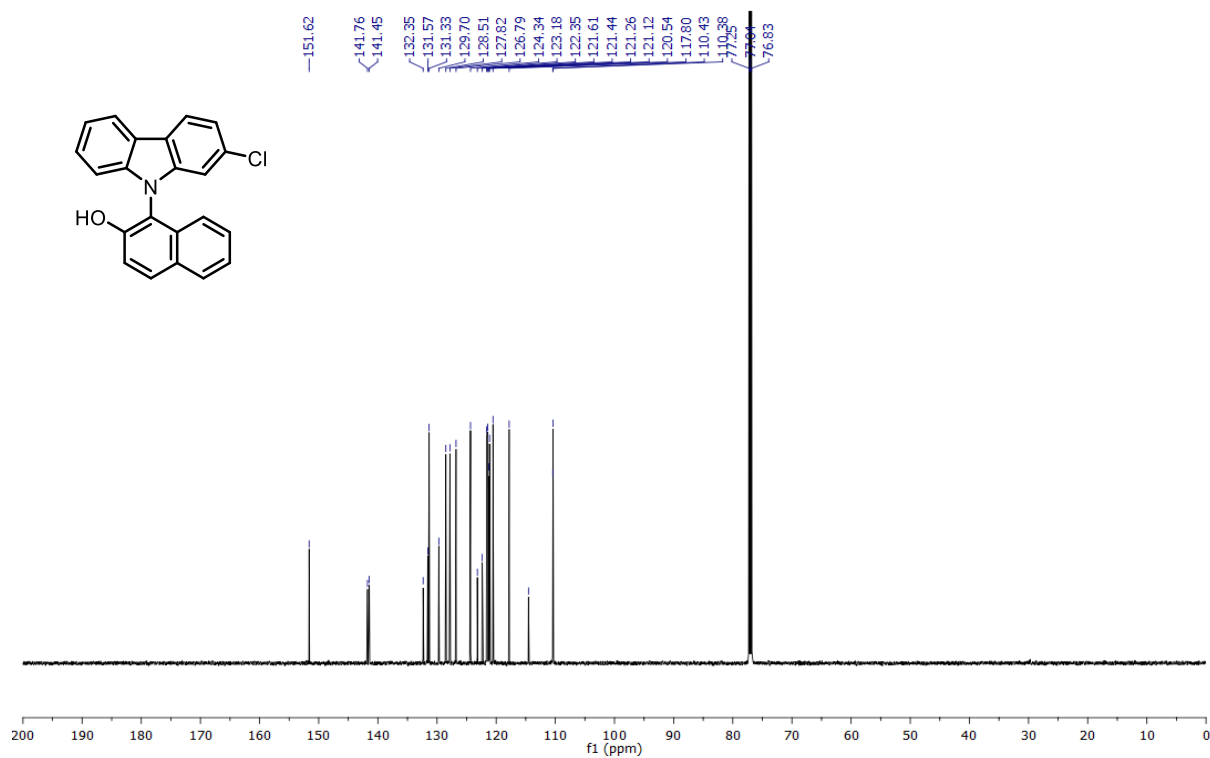

# 1-(3,6-Dichloro-9*H*-carbazol-9-yl)naphthalen-2-ol (7e)

<sup>1</sup>H NMR (400 MHz, Chloroform-*d*)

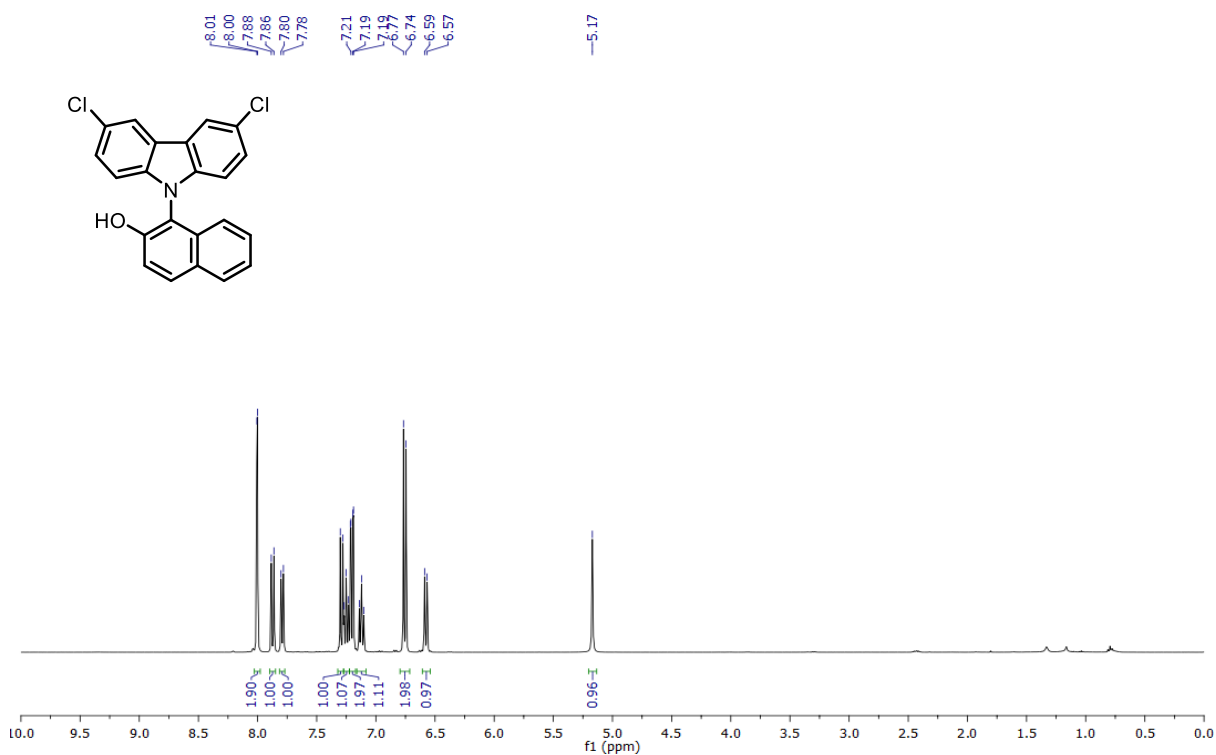

<sup>13</sup>C NMR (101 MHz, Chloroform-*d*)

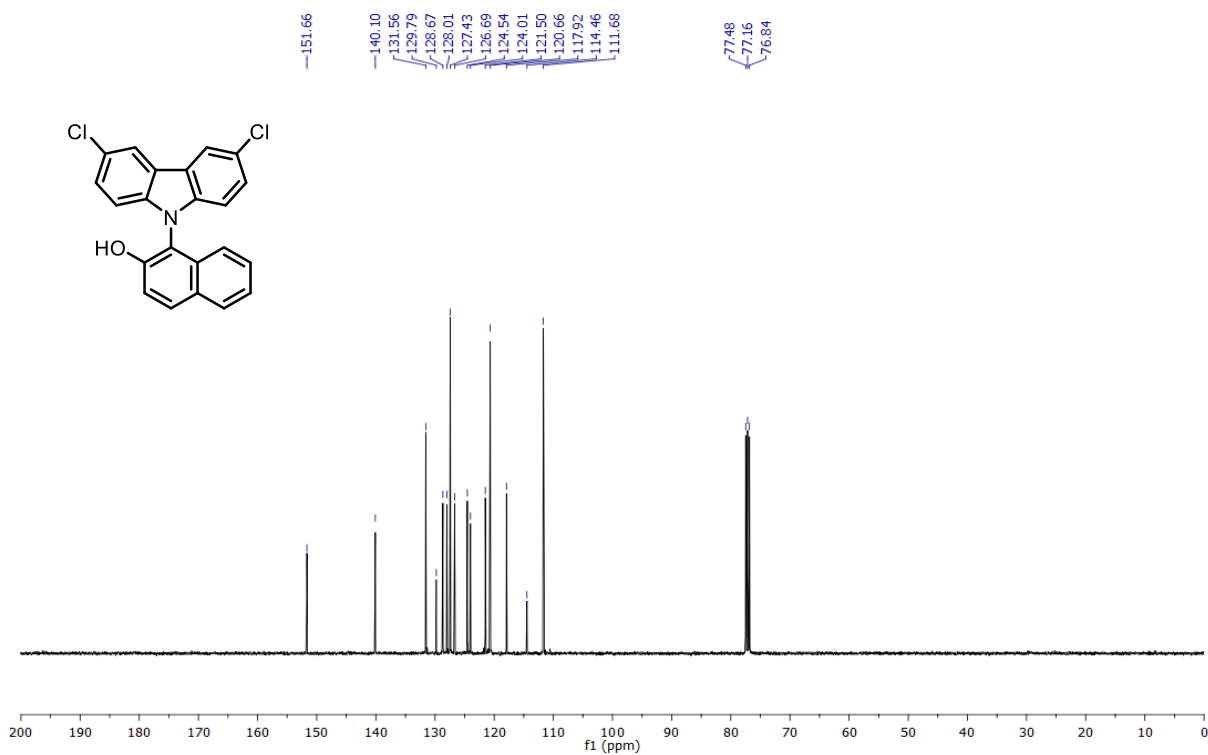



# 1-(3,6-Dibromo-9H-carbazol-9-yl)naphthalen-2-ol (7f)

$^1\text{H}$  NMR (600 MHz, Chloroform-*d*)

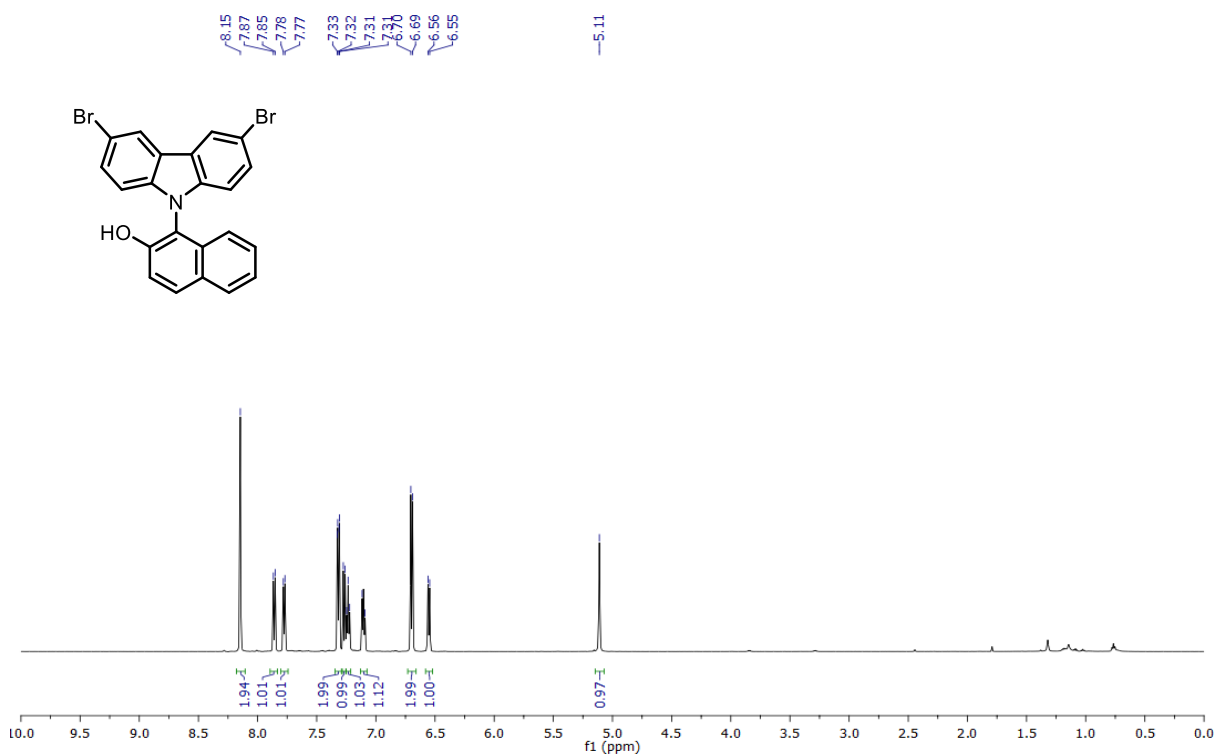

$^{13}\text{C}$  NMR (151 MHz, Chloroform-*d*)

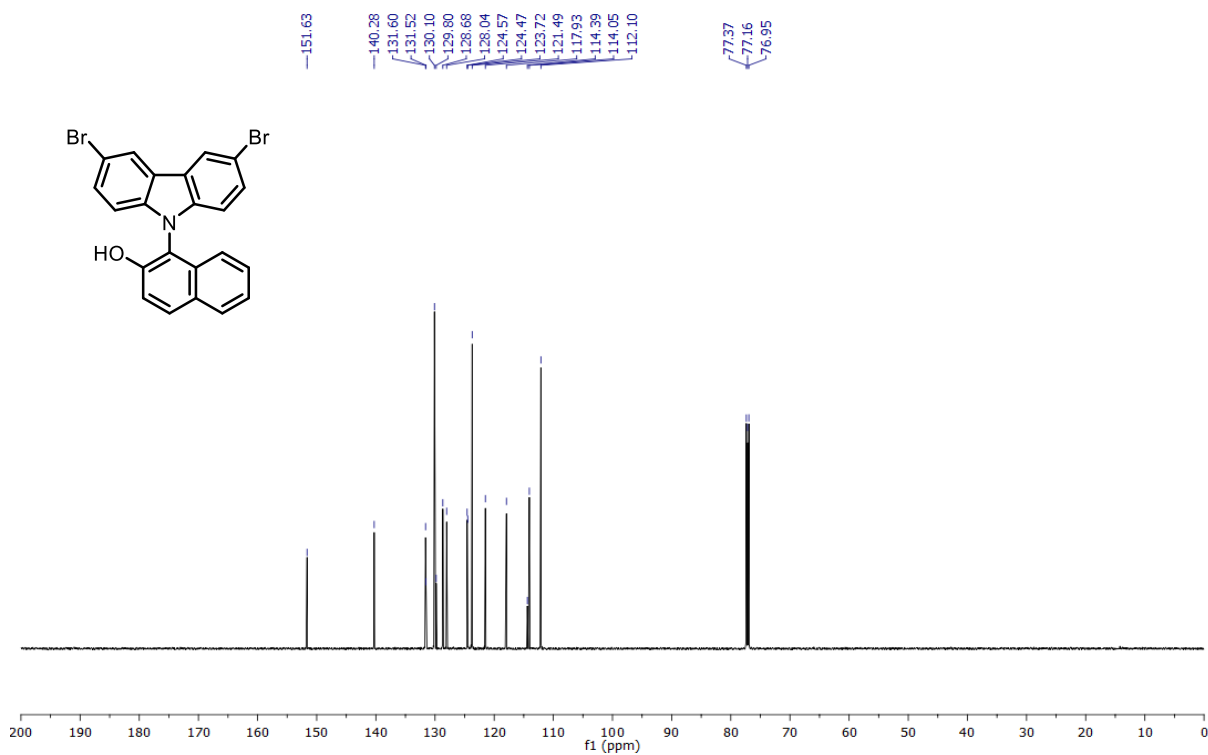

# 1-(2,7-Dibromo-9H-carbazol-9-yl)naphthalen-2-ol (7g)

$^1\text{H}$  NMR (600 MHz, Chloroform-*d*)

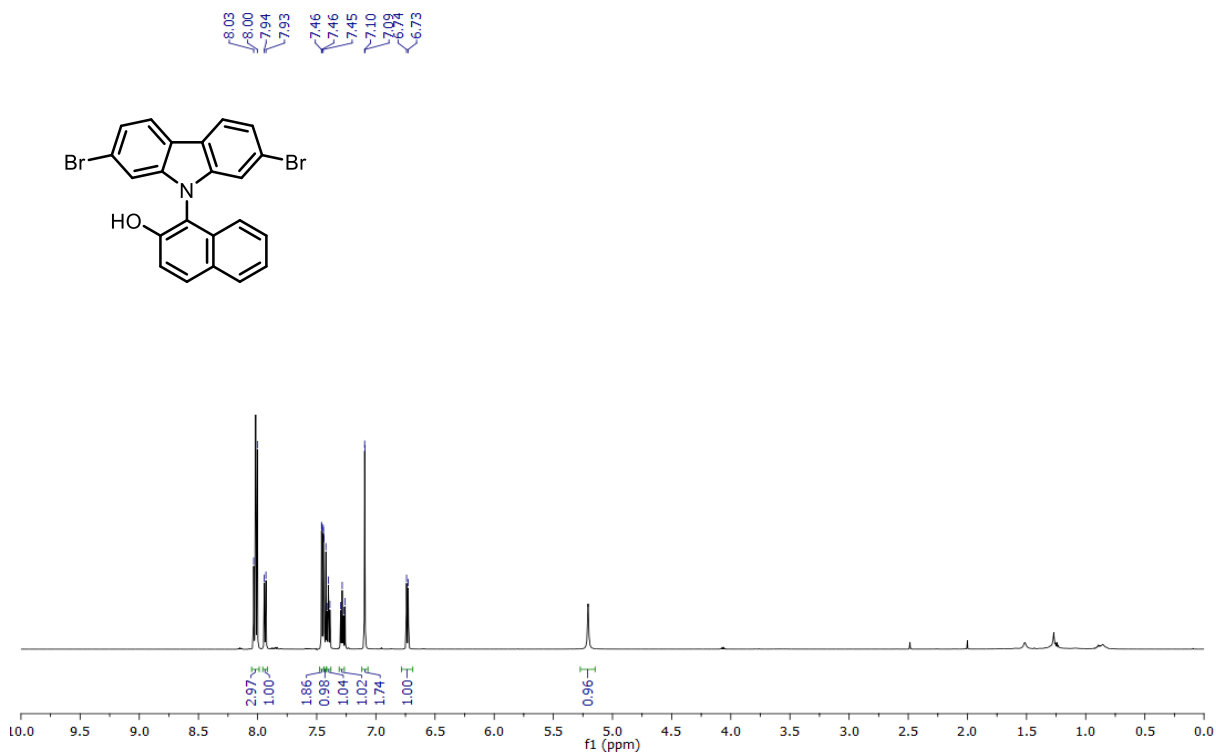

$^{13}\text{C}$  NMR (151 MHz, Chloroform-*d*)

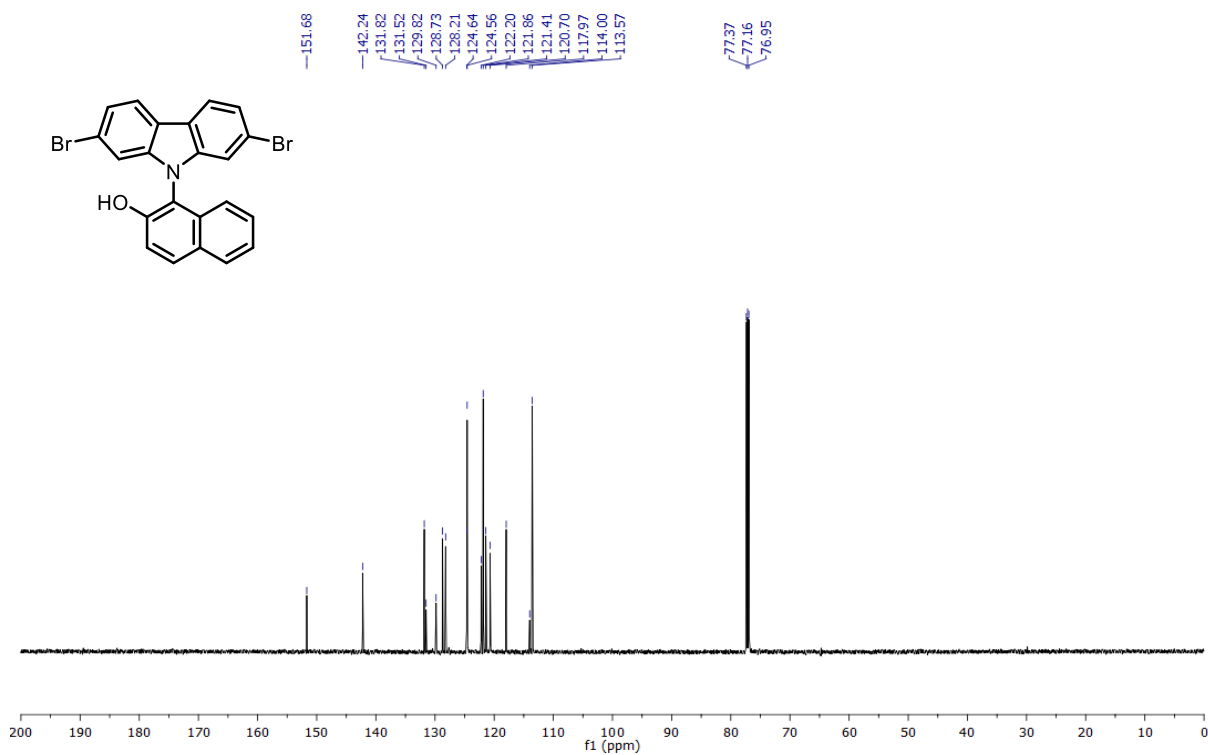

# 1-(9H-[3,9'-Bicarbazol]-9-yl)naphthalen-2-ol (7h)

<sup>1</sup>H NMR (600 MHz, Chloroform-*d*)

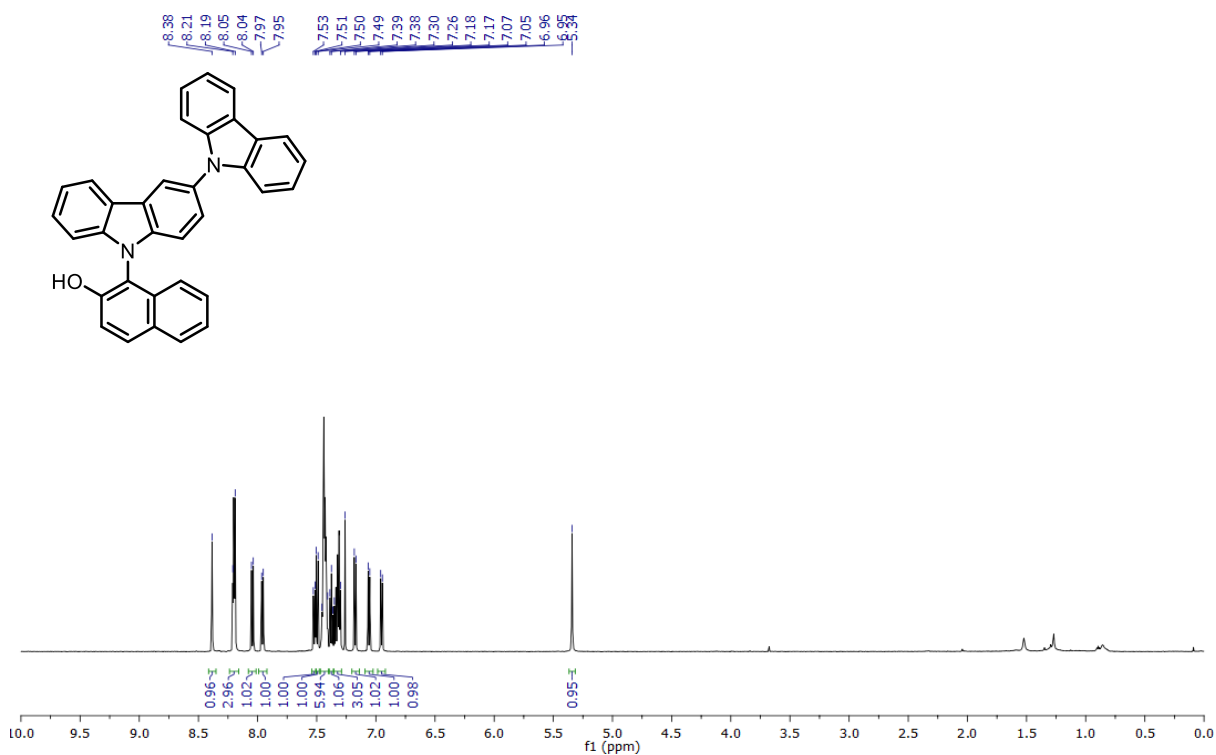

<sup>13</sup>C NMR (151 MHz, Chloroform-*d*)

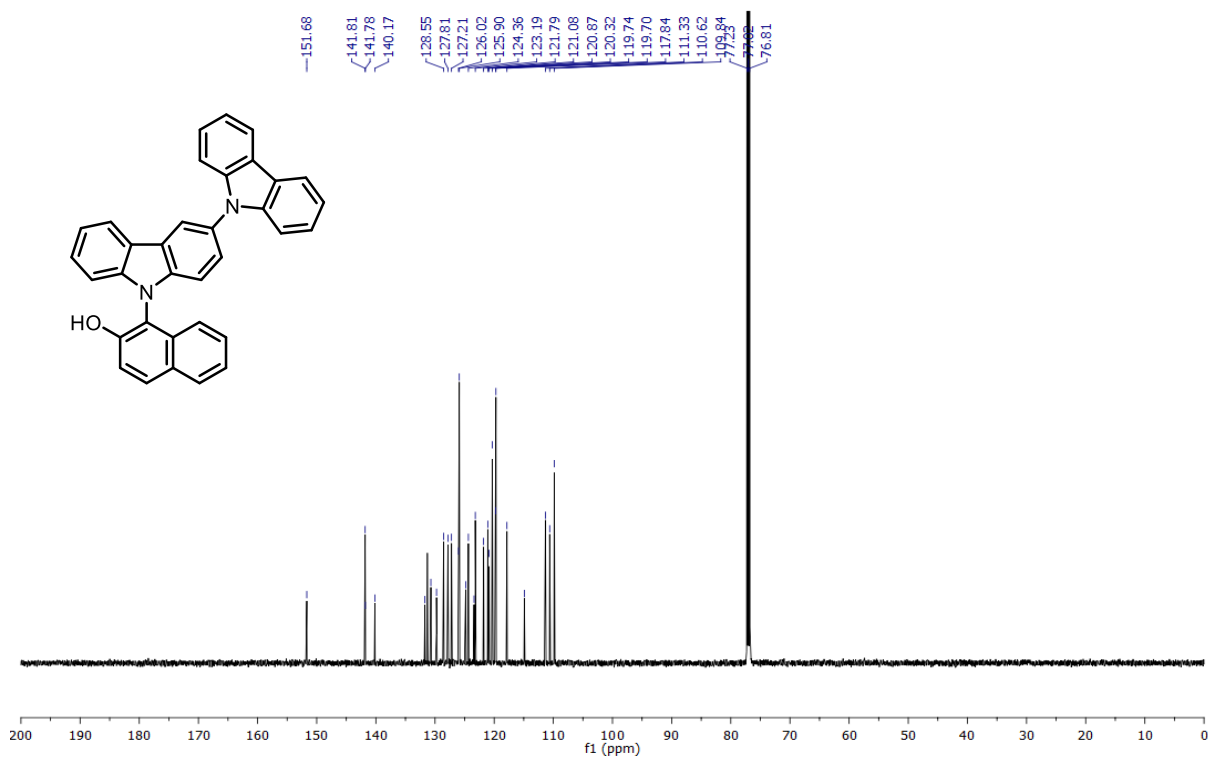

# 1-(7*H*-Benzo[*c*]carbazol-7-yl)naphthalen-2-ol (7i)

<sup>1</sup>H NMR (400 MHz, Chloroform-*d*)

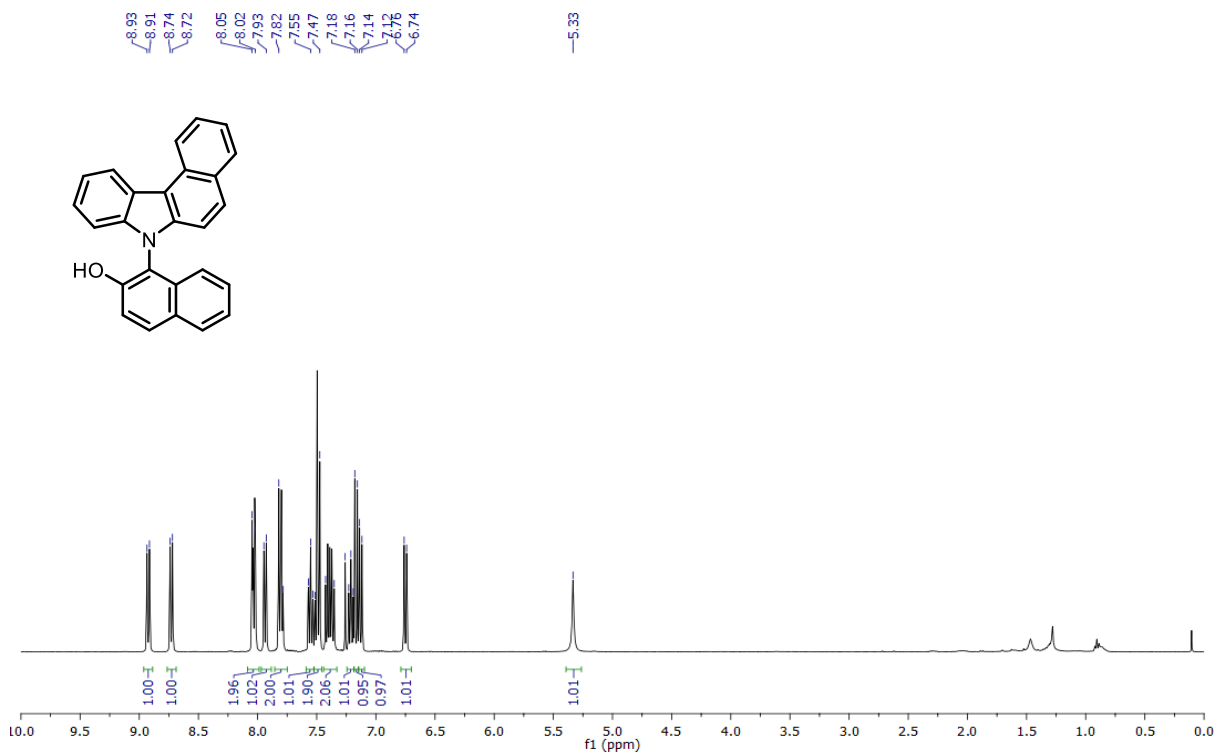

<sup>13</sup>C NMR (101 MHz, Chloroform-*d*)

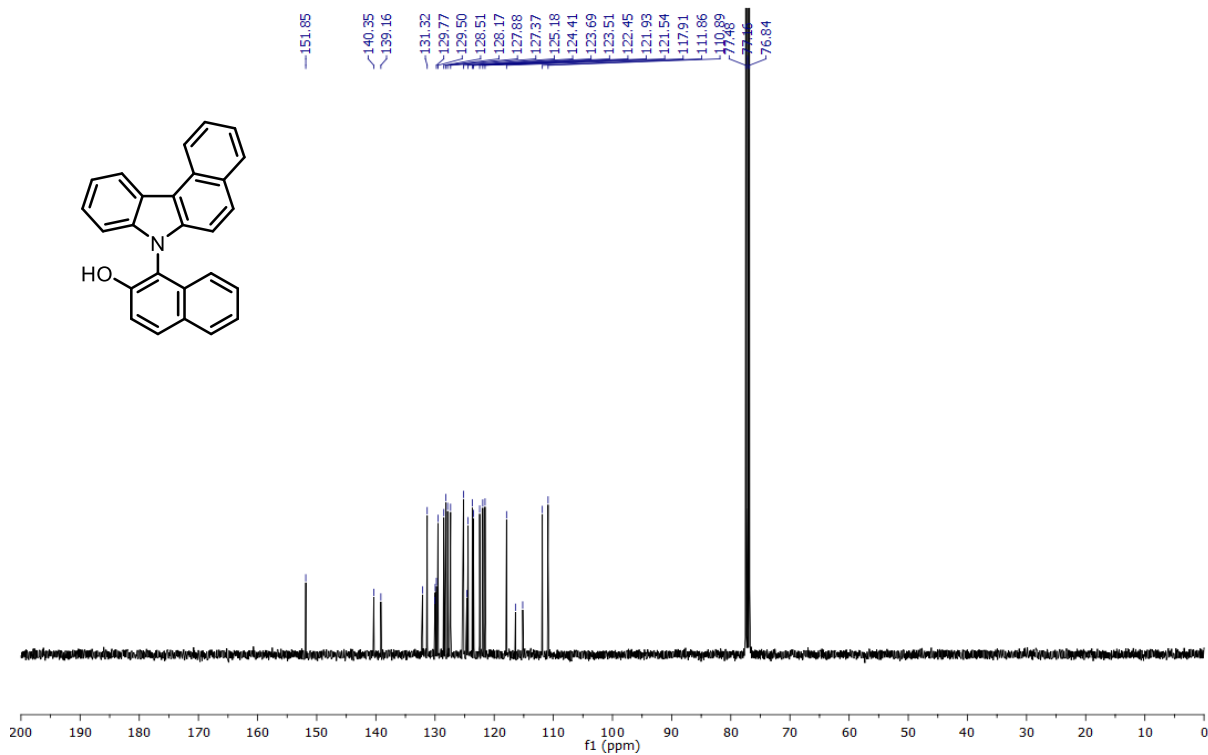

# 1-(4-(Oxiran-2-ylmethoxy)-9H-carbazol-9-yl)naphthalen-2-ol (7j)

<sup>1</sup>H NMR (600 MHz, Chloroform-*d*)

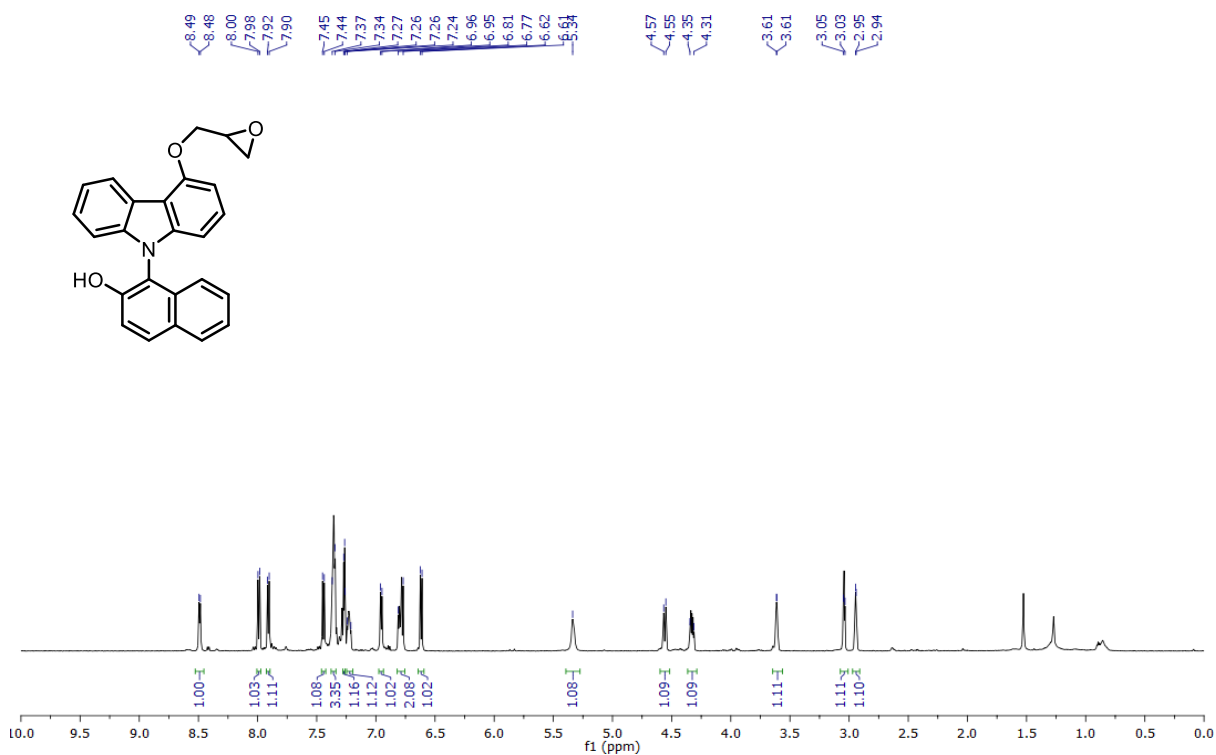

<sup>13</sup>C NMR (151 MHz, Chloroform-*d*)

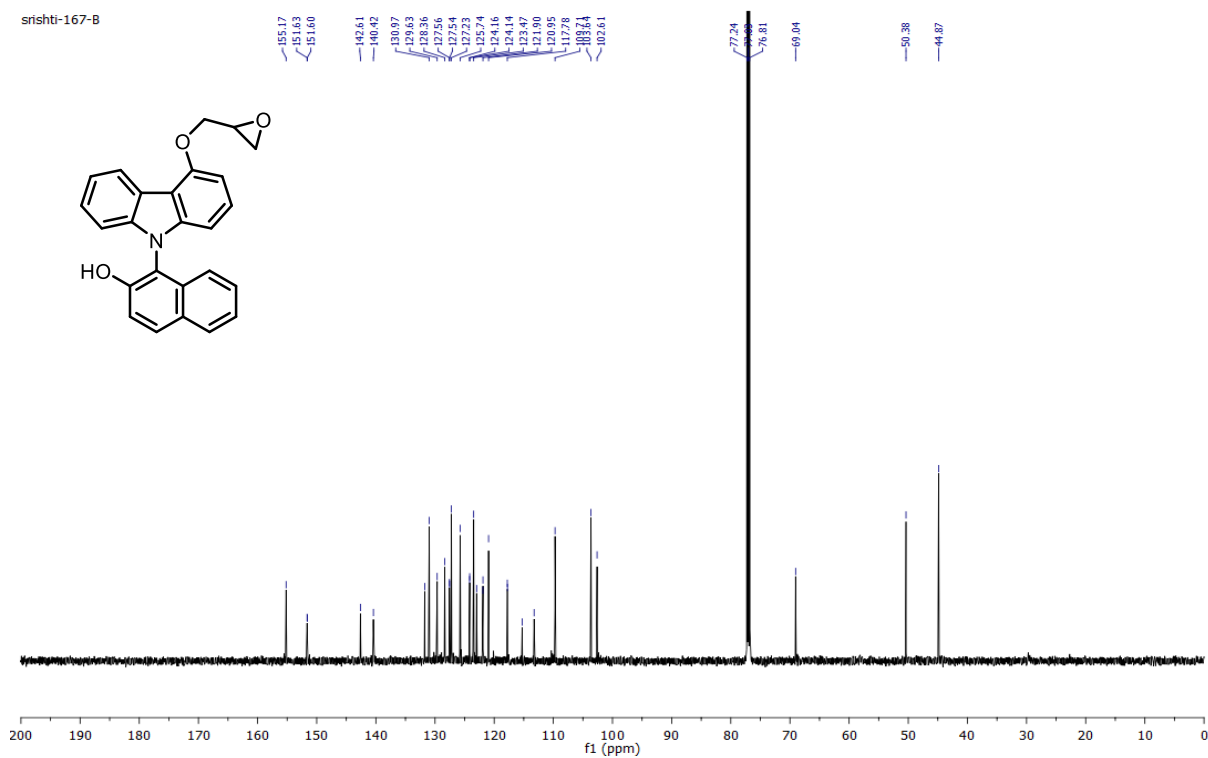

# 8-(Indolo[2,3-a]carbazol-11(12H)-yl)naphthalen-2-ol (7k)

<sup>1</sup>H NMR (600 MHz, Chloroform-*d*)

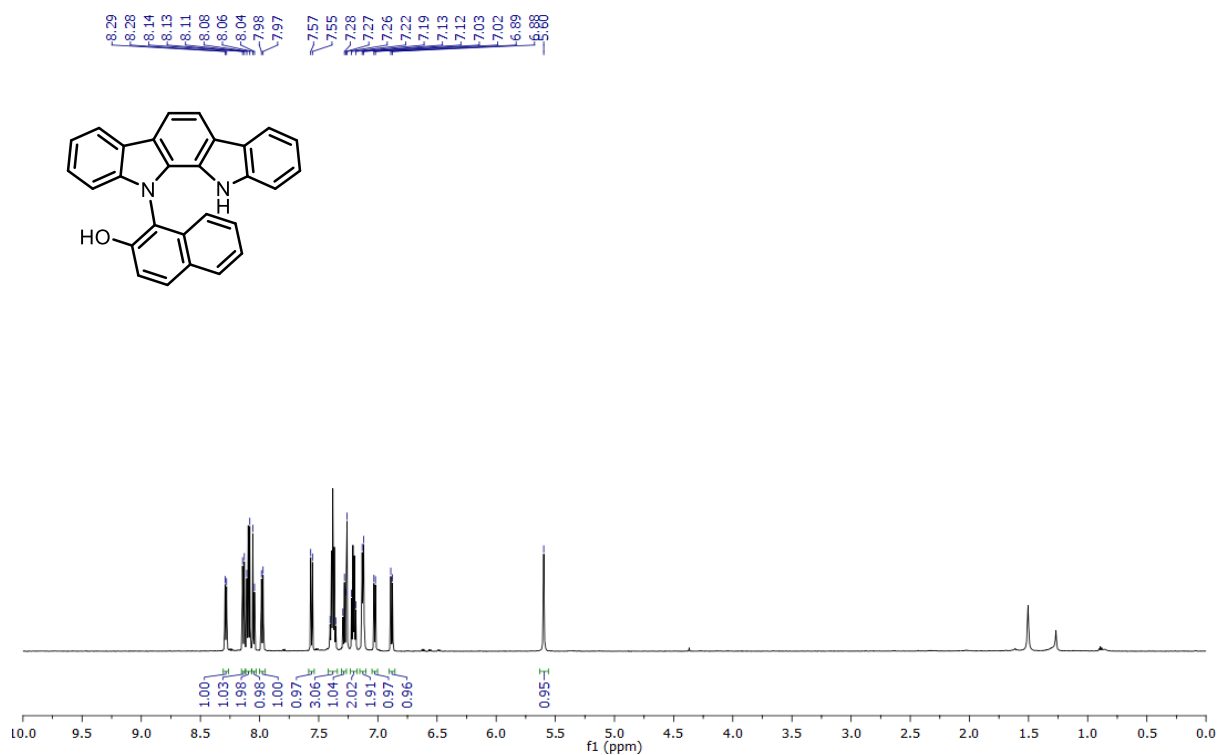

<sup>13</sup>C NMR (151 MHz, Chloroform-*d*)

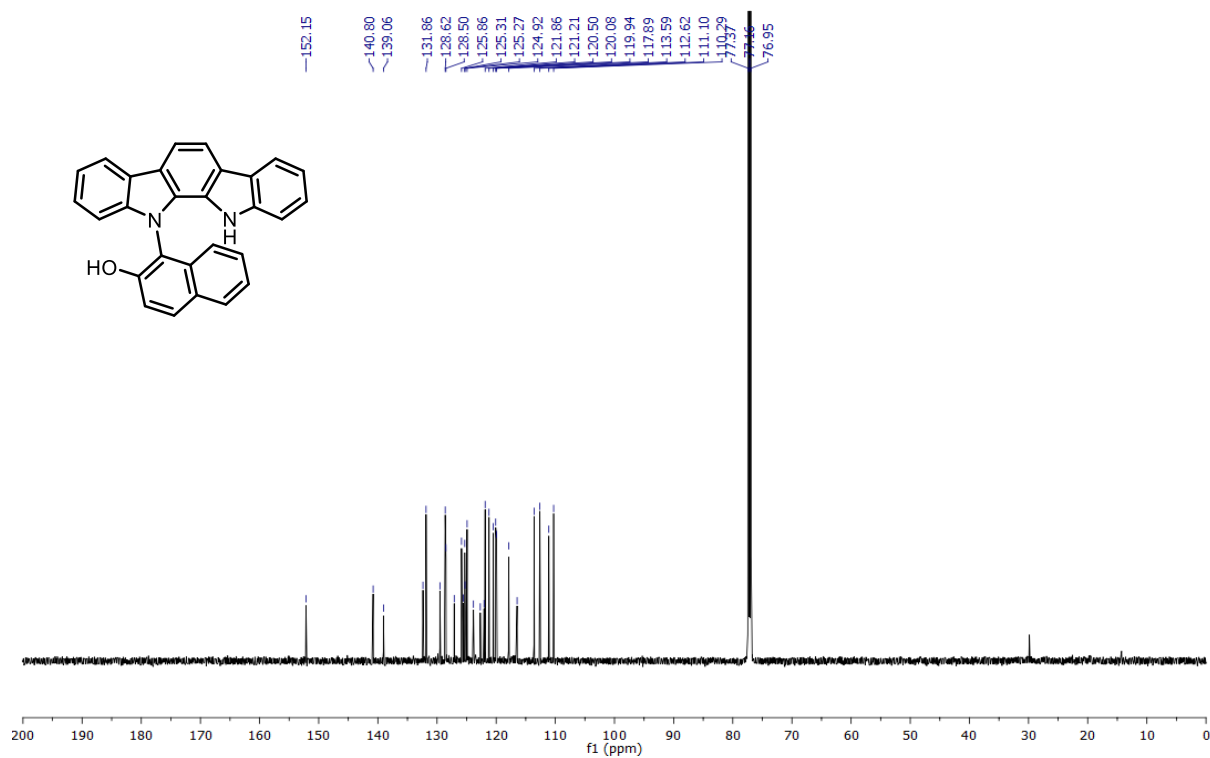

# 1-(1,2,3,4-Tetrahydro-9H-carbazol-9-yl)naphthalen-2-ol (71)

$^1\text{H}$  NMR (400 MHz, Chloroform-*d*)

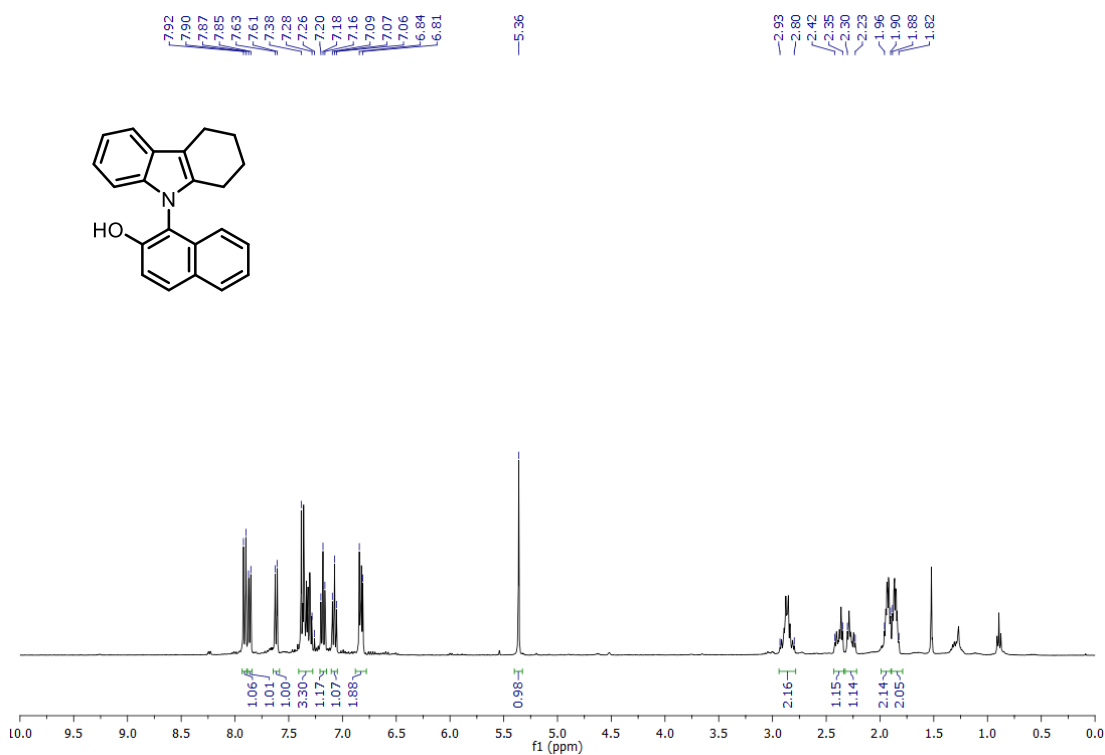

$^{13}\text{C}$  NMR (151 MHz, Chloroform-*d*)

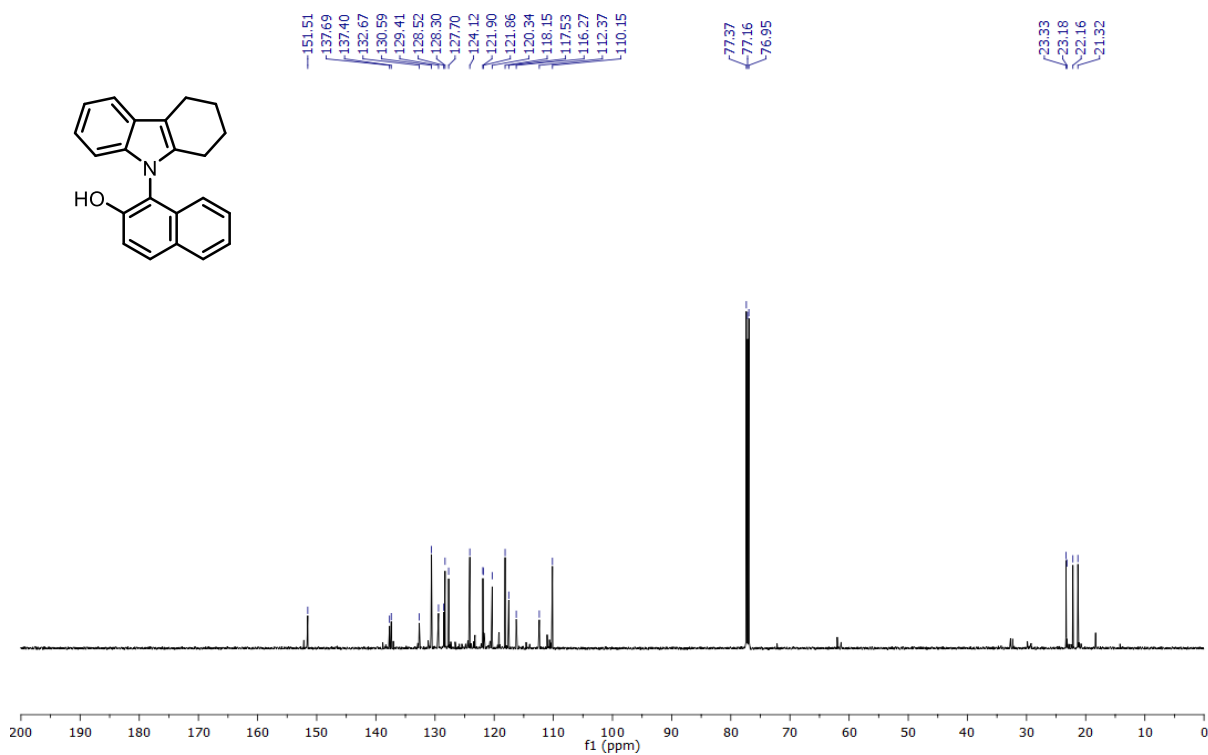

# 1-(10,11-Dihydro-5H-dibenzo[b,f]azepin-5-yl)naphthalen-2-ol (7m)

$^1\text{H}$  NMR (600 MHz, Chloroform-*d*)

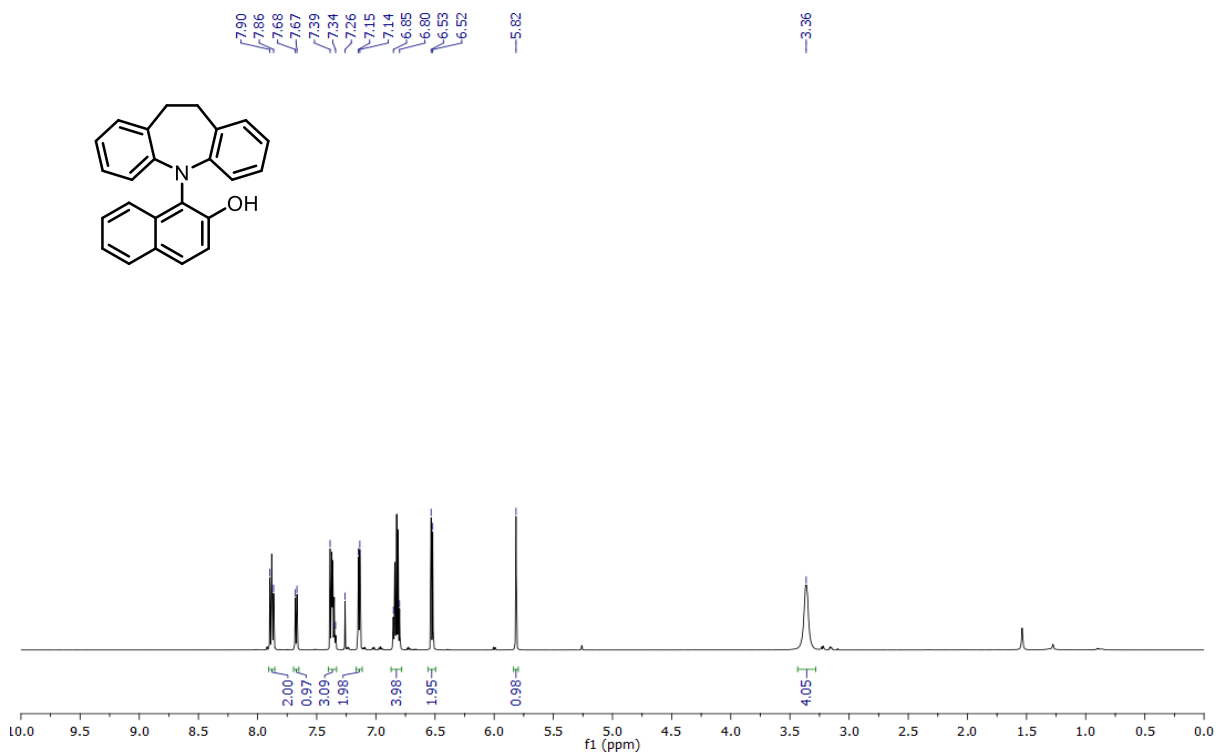

$^{13}\text{C}$  NMR (151 MHz, Chloroform-*d*)

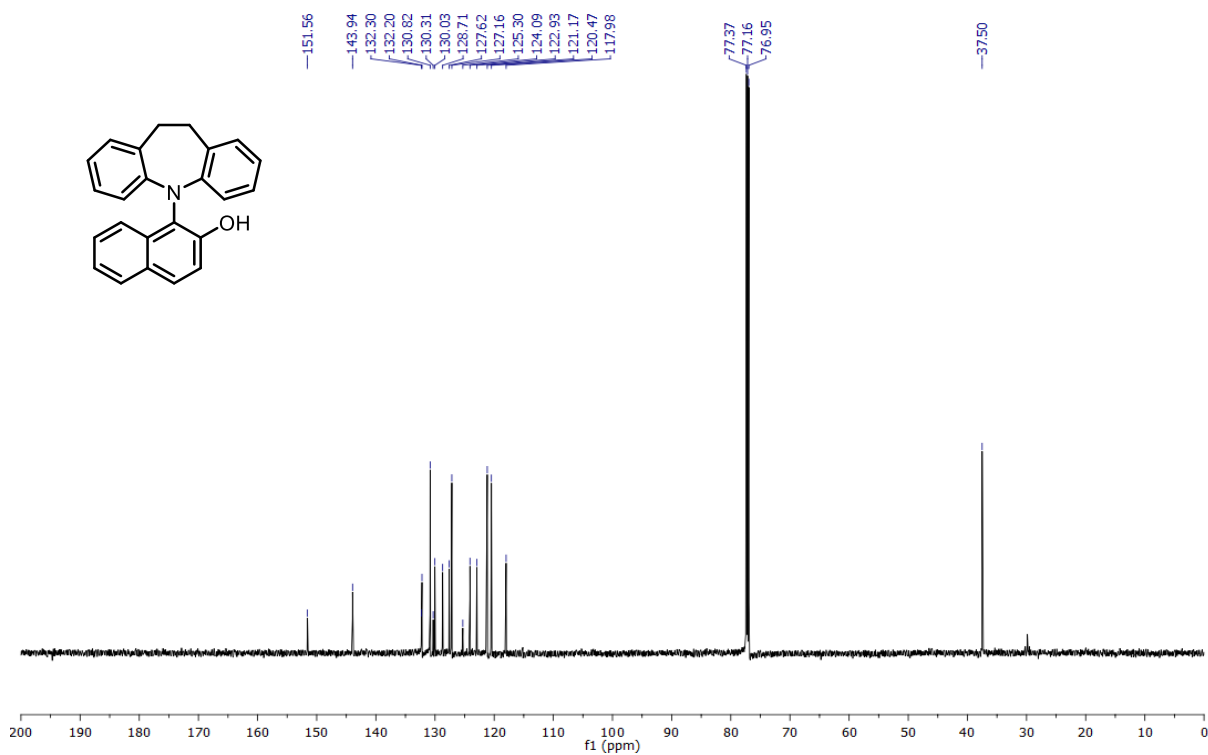



# 1-(Diphenylamino)naphthalen-2-ol (7n)

$^1\text{H NMR}$  (600 MHz, Chloroform-*d*)

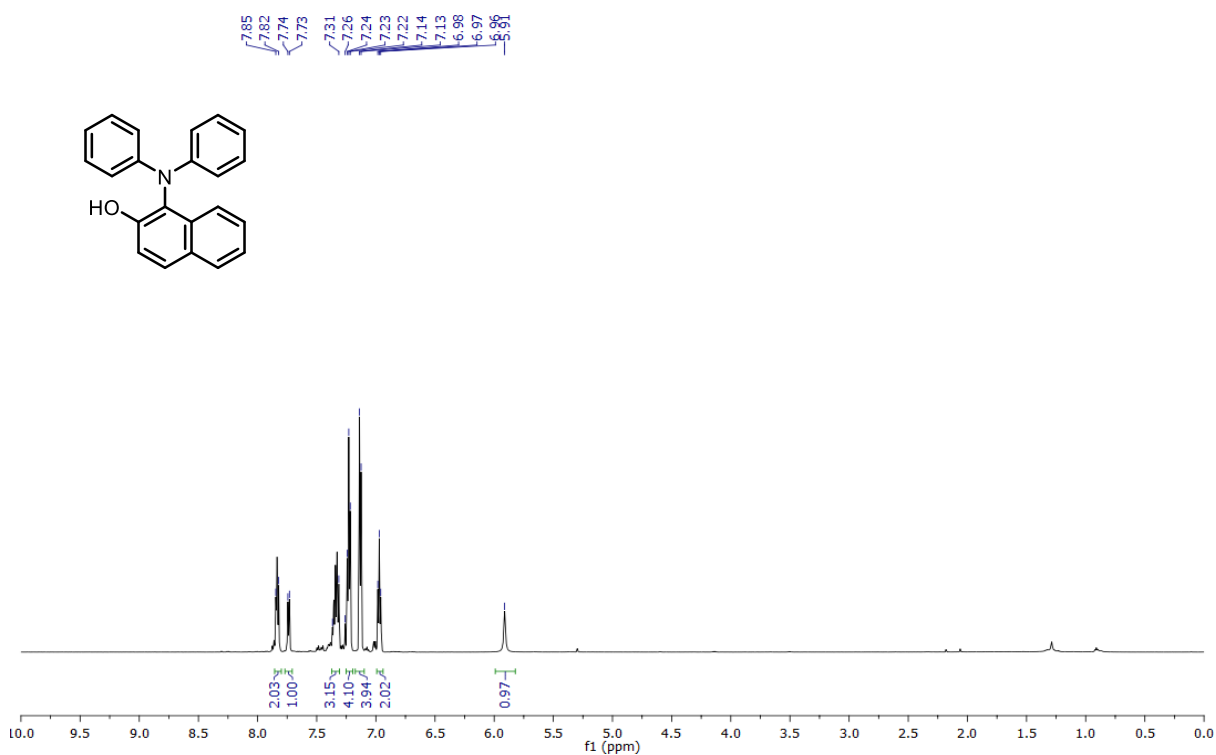

$^{13}\text{C NMR}$  (151 MHz, Chloroform-*d*)

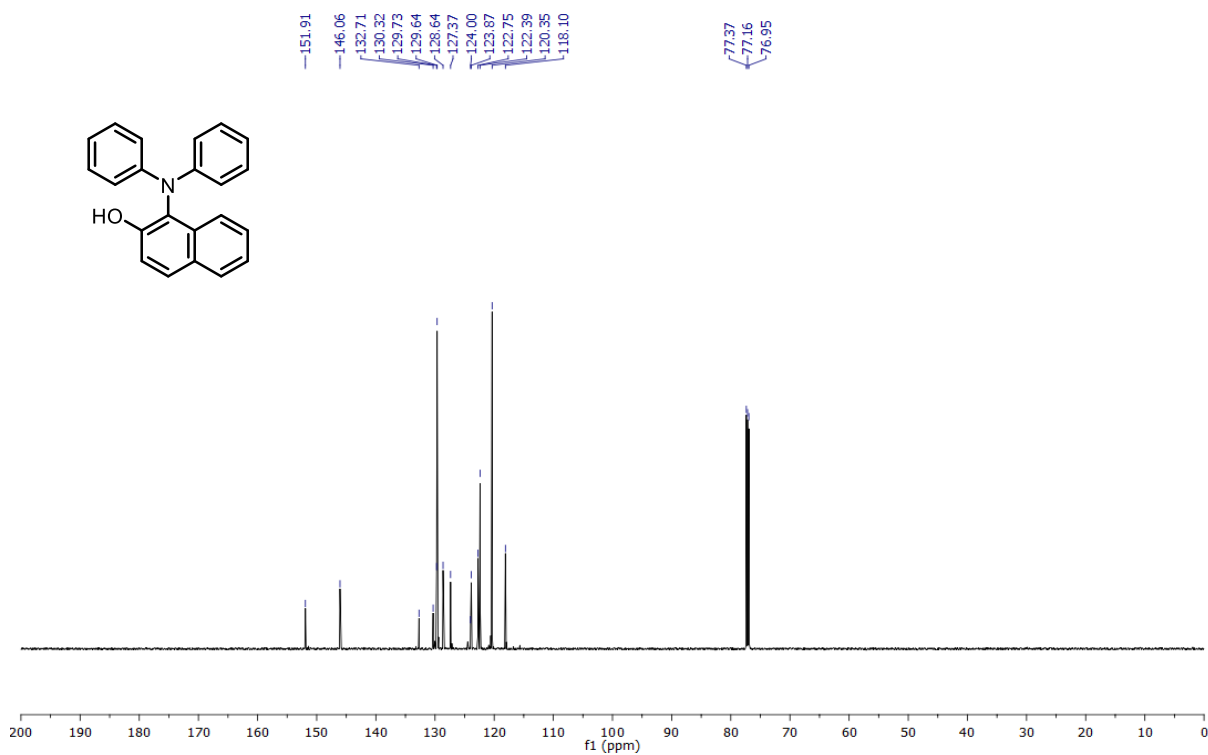

# 1-(10*H*-Phenoxazin-10-yl)naphthalen-2-ol (7o)

<sup>1</sup>H NMR (600 MHz, Chloroform-*d*)

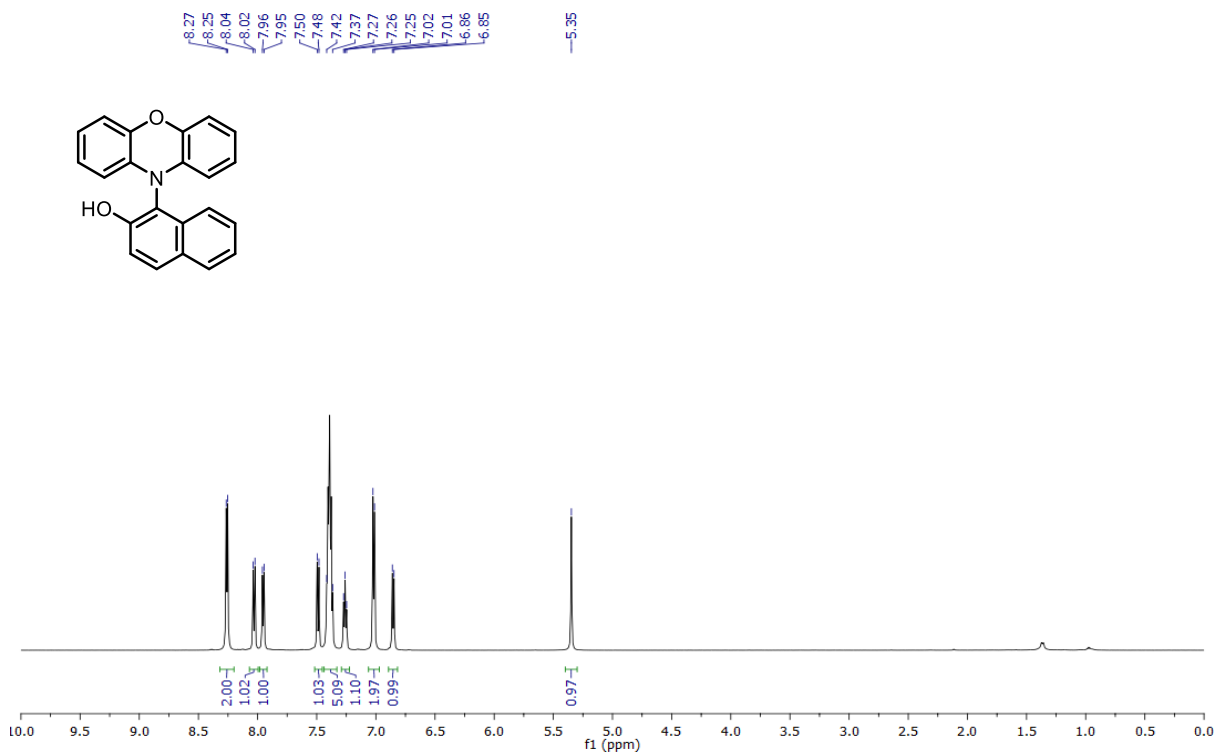

<sup>13</sup>C NMR (151 MHz, Chloroform-*d*)

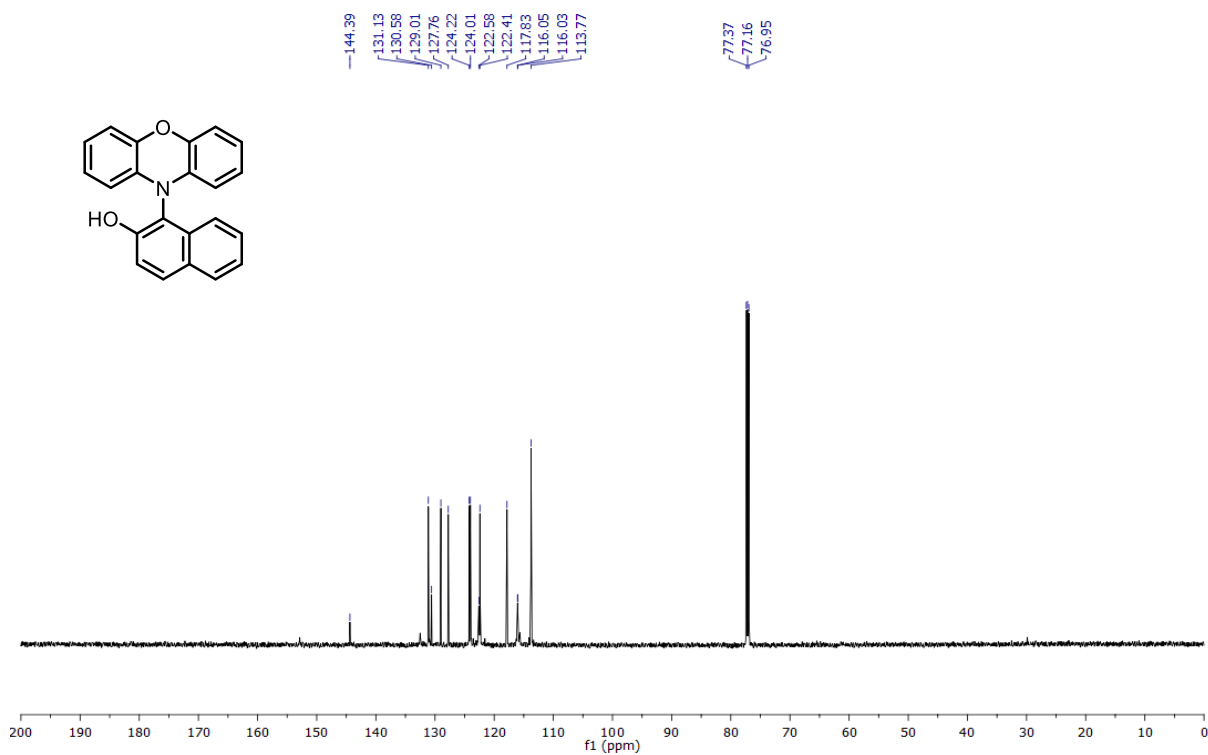

# 1-(9H-Carbazol-9-yl)-6-methoxynaphthalen-2-ol (7p)

$^1\text{H}$  NMR (600 MHz, Chloroform-*d*)

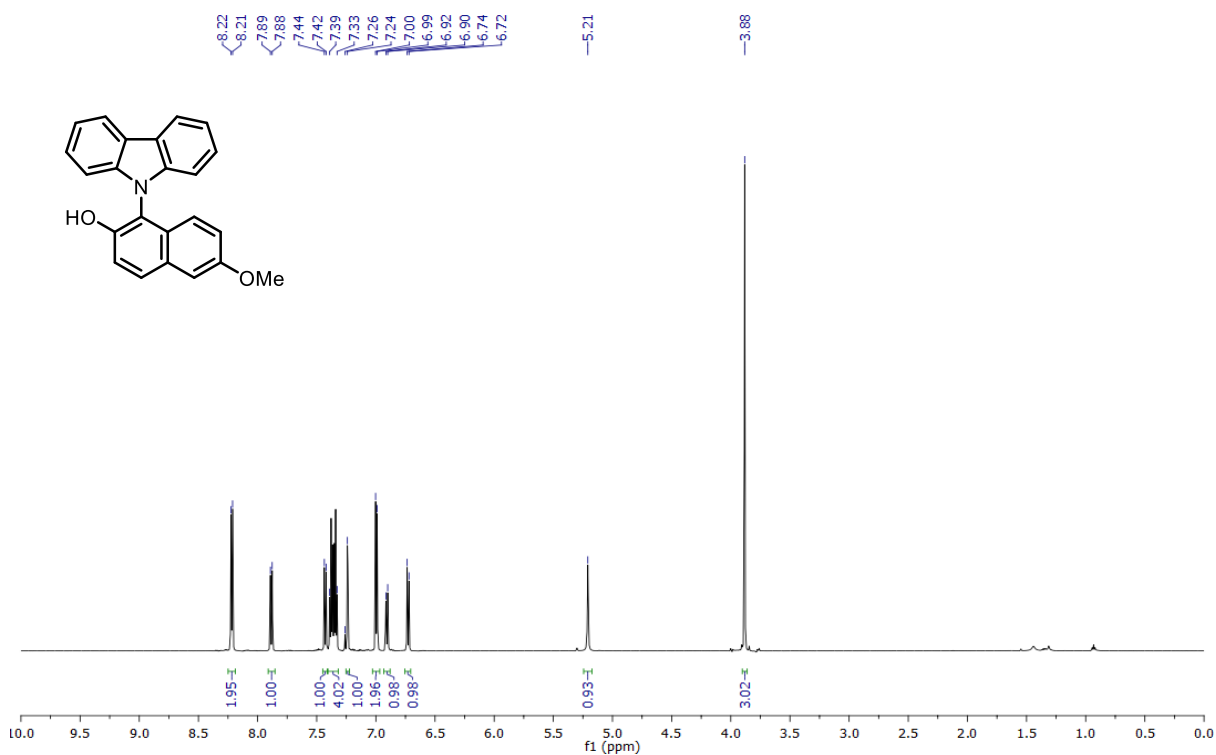

$^{13}\text{C}$  NMR (151 MHz, Chloroform-*d*)

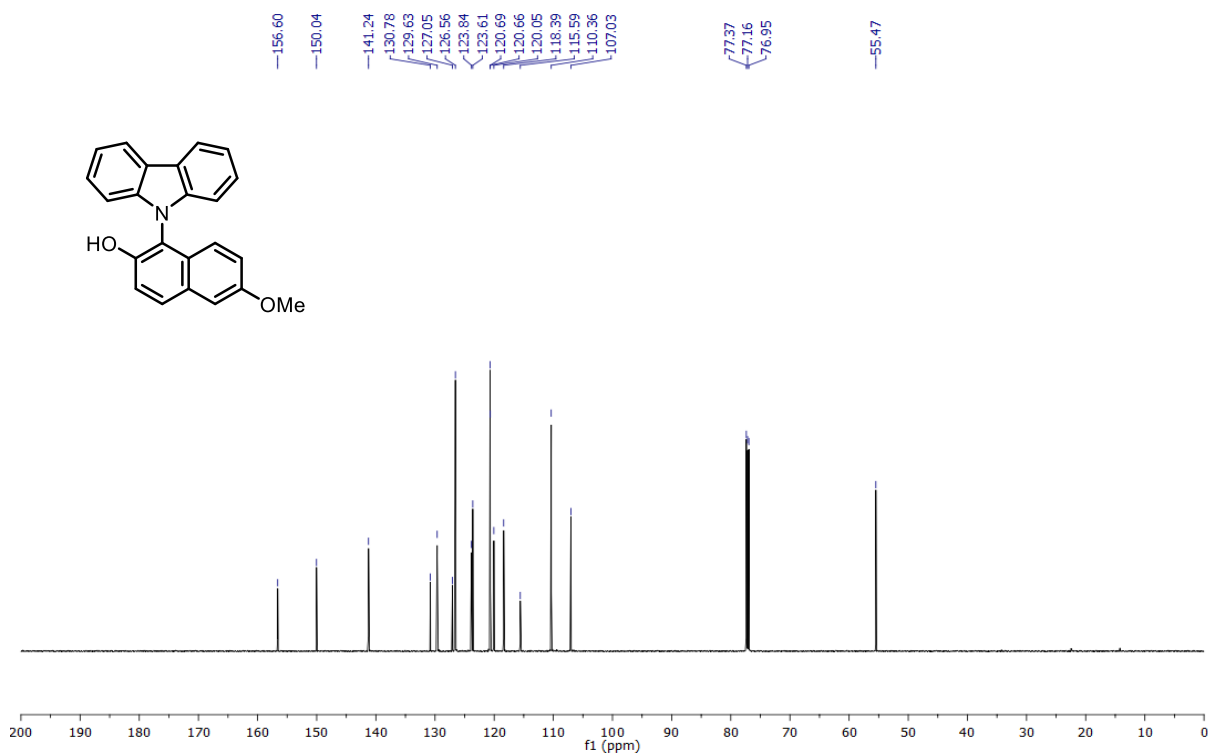

## 6-Bromo-1-(9H-carbazol-9-yl)naphthalen-2-ol (7q)

$^1\text{H}$  NMR (600 MHz, Chloroform-*d*)

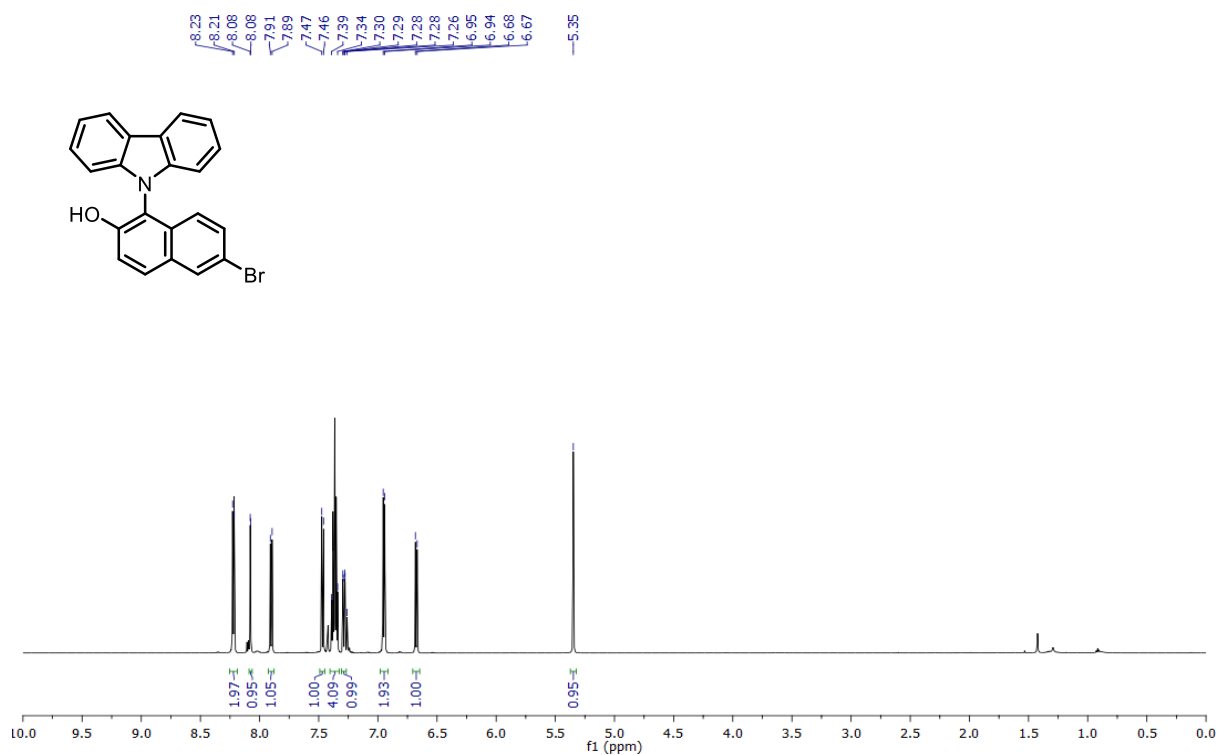

$^{13}\text{C}$  NMR (151 MHz, Chloroform-*d*)

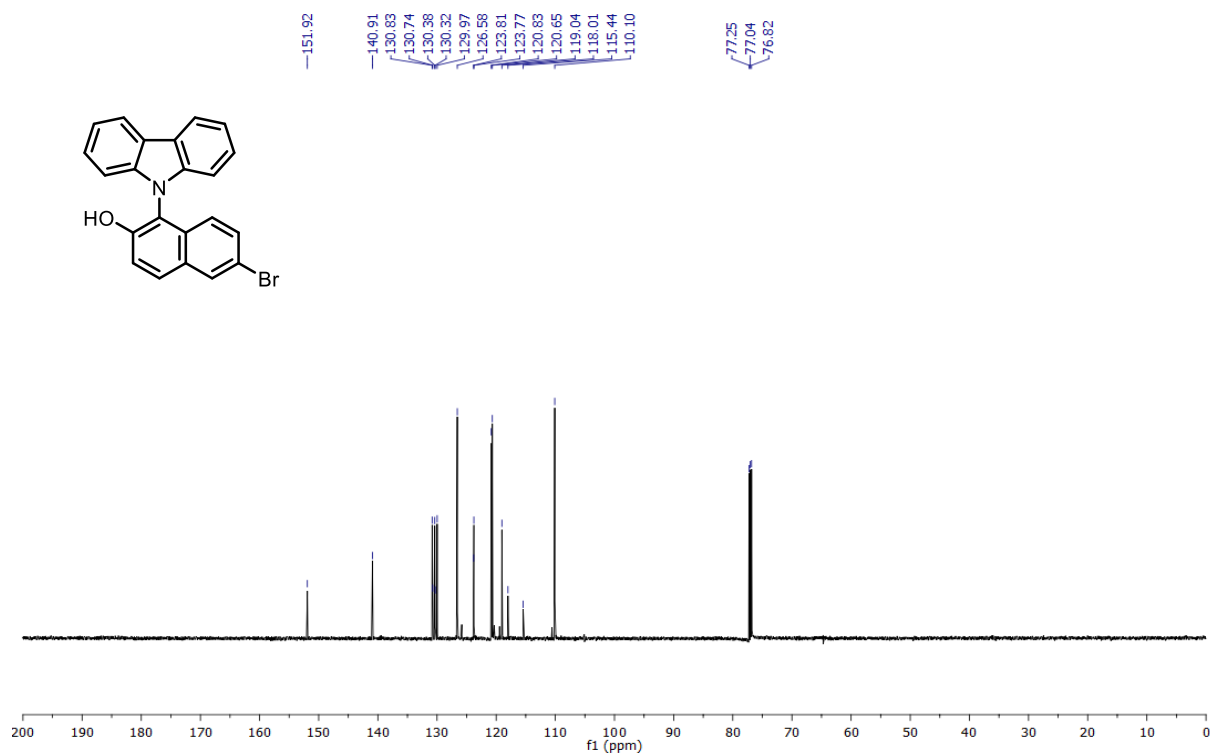

### 5-(9*H*-Carbazol-9-yl)-6-hydroxynaphthalen-2-yl acetate (7r)

<sup>1</sup>H NMR (600 MHz, Chloroform-*d*)

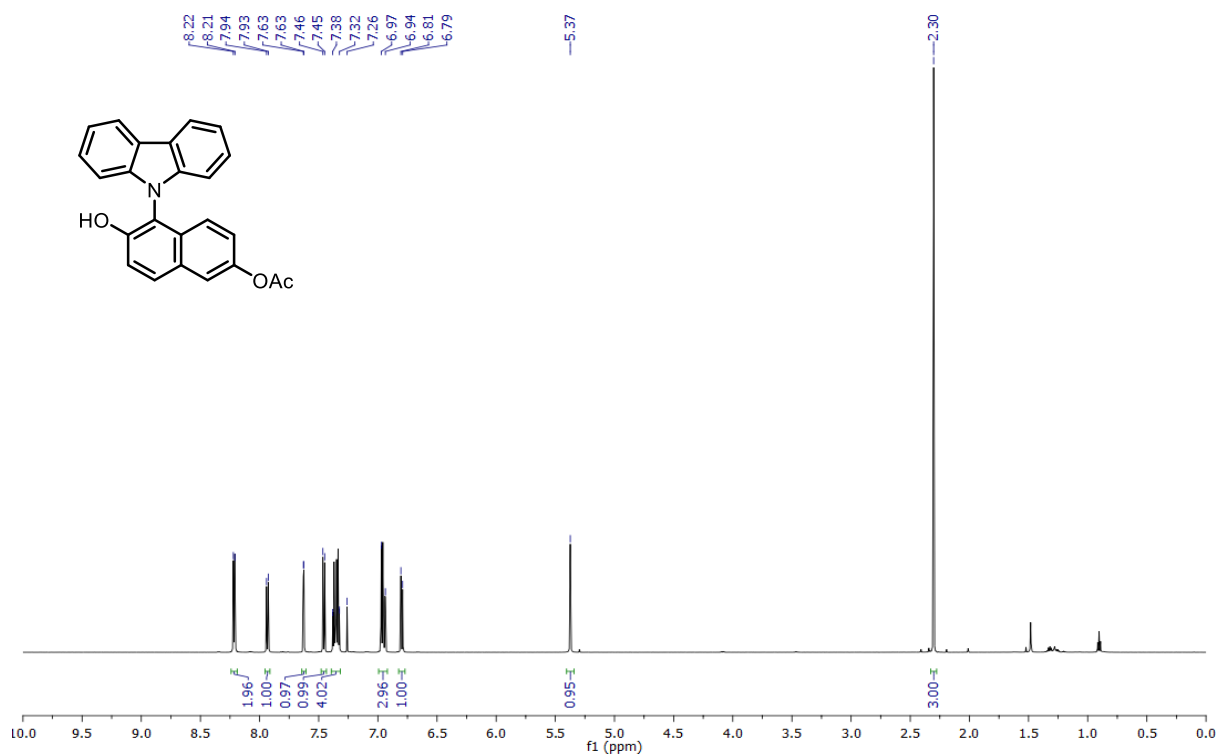

<sup>13</sup>C NMR (151 MHz, Chloroform-*d*)

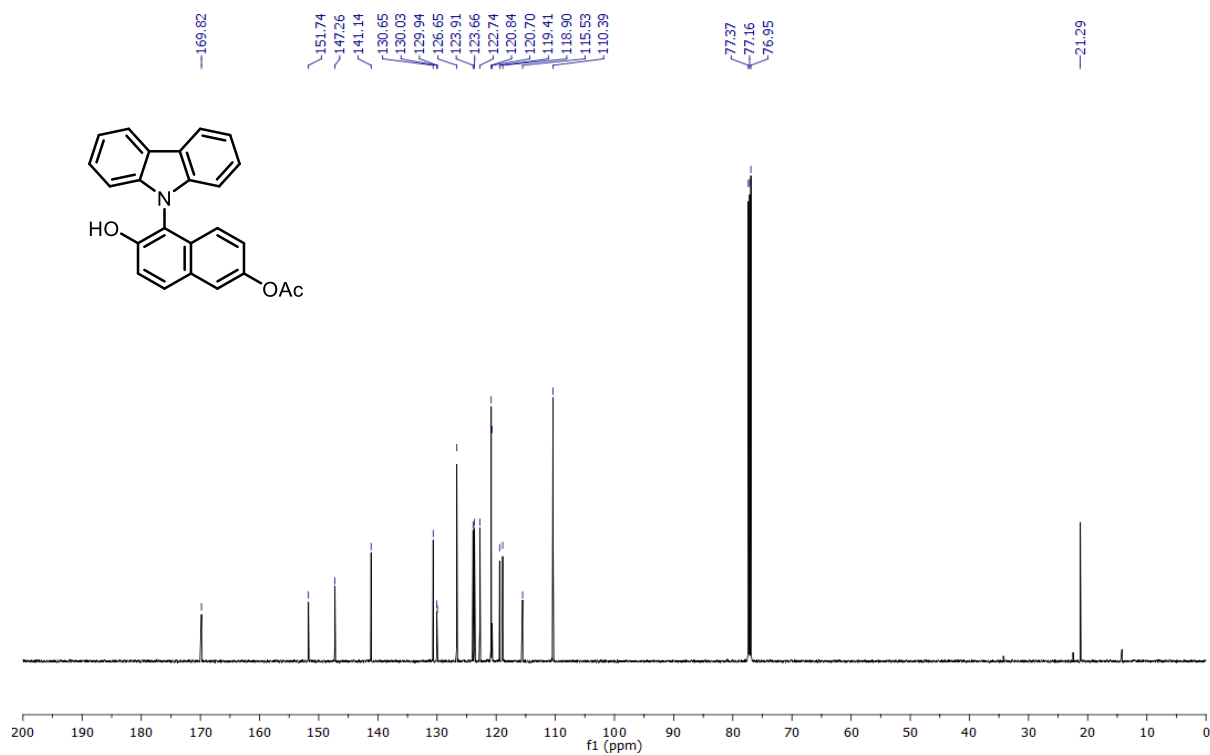

# 1-(9H-Carbazol-9-yl)-7-methoxynaphthalen-2-ol (7s)

$^1\text{H}$  NMR (400 MHz, Chloroform-*d*)

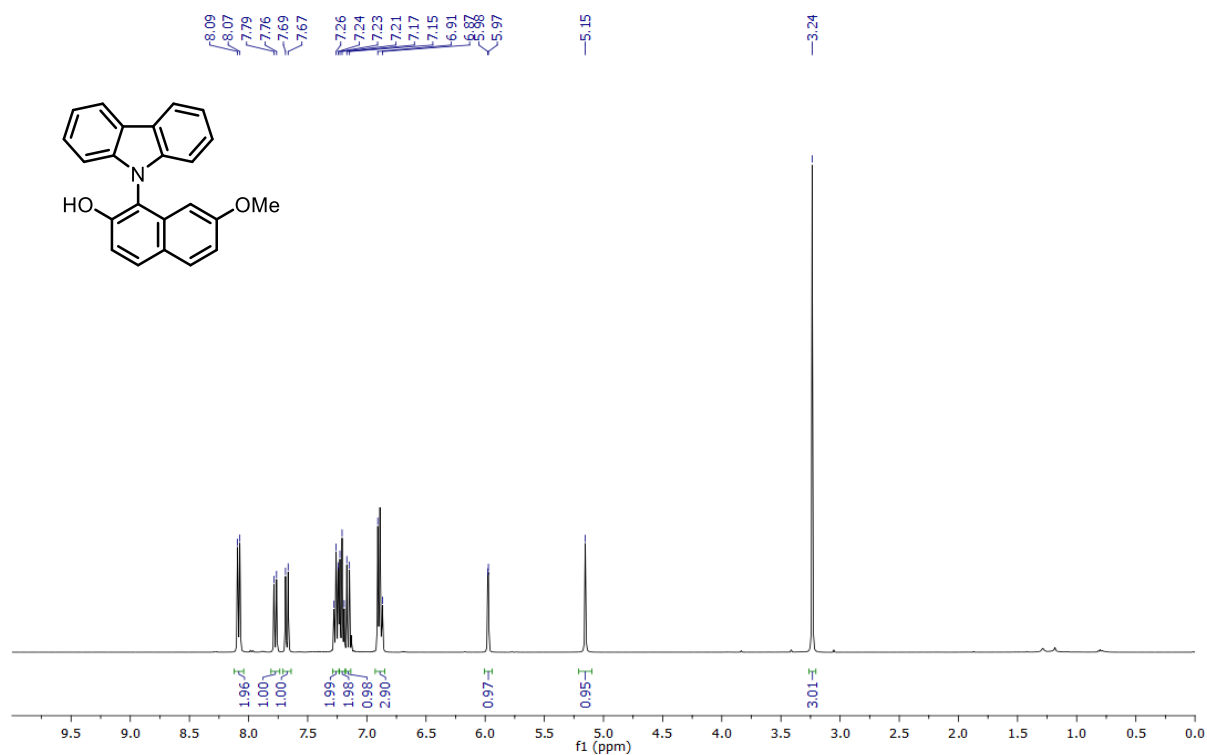

$^{13}\text{C}$  NMR (101 MHz, Chloroform-*d*)

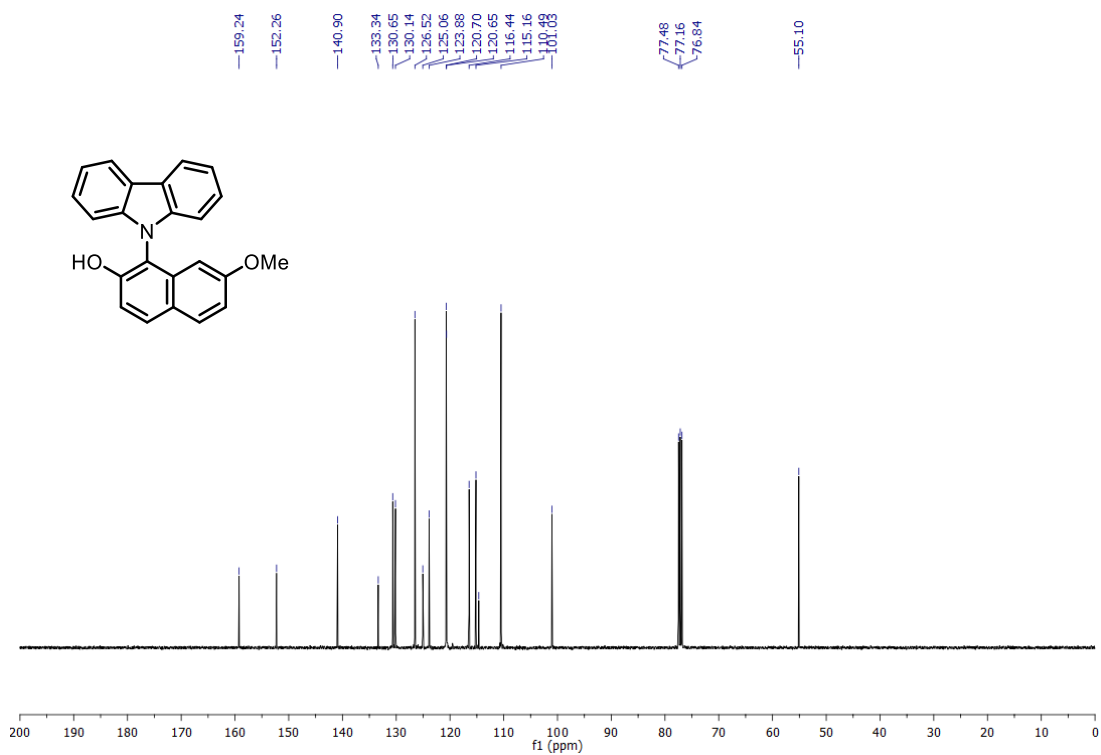

## 7-Bromo-1-(9H-carbazol-9-yl)naphthalen-2-ol (7t)

$^1\text{H NMR}$  (600 MHz, Chloroform-*d*)

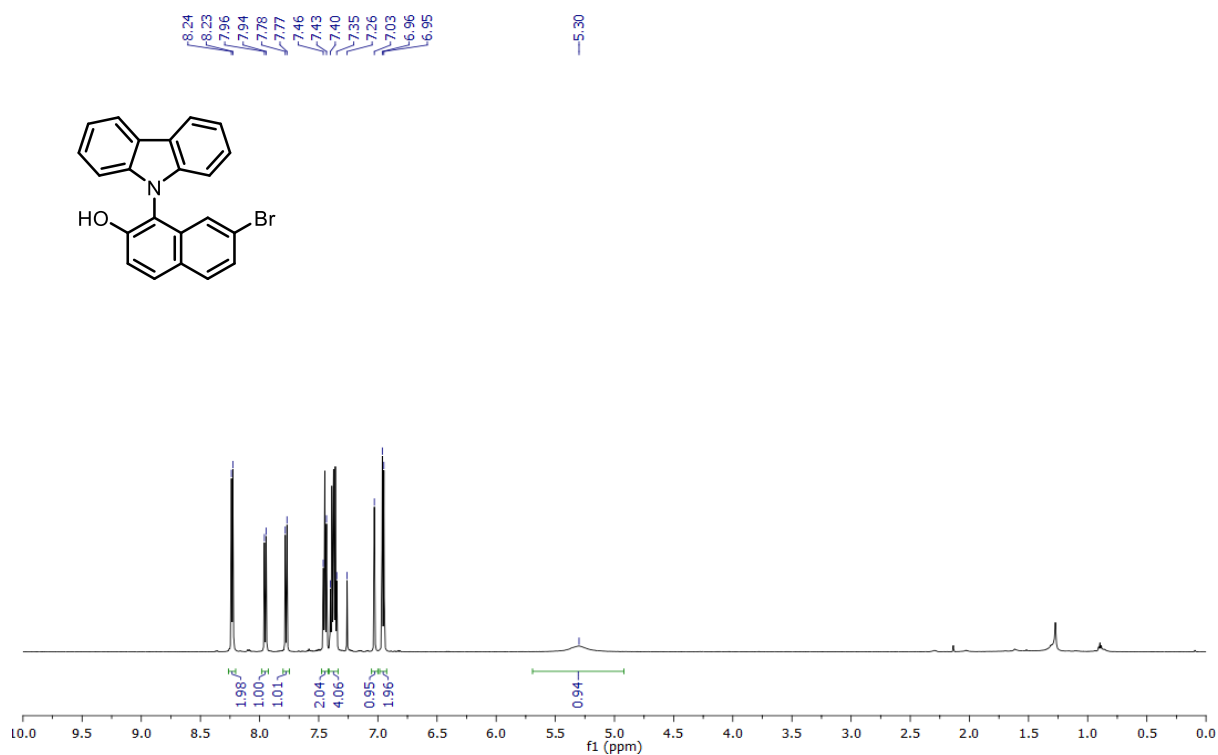

$^{13}\text{C NMR}$  (151 MHz, Chloroform-*d*)

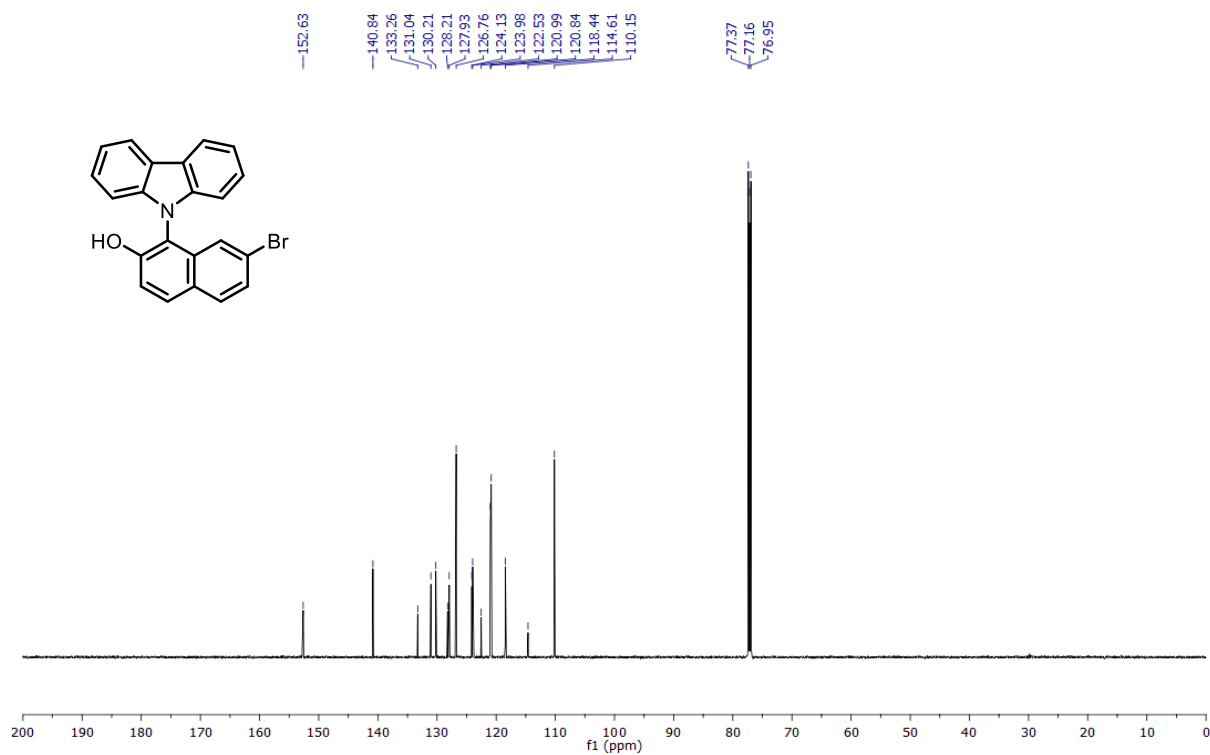

### 3-Bromo-1-(9*H*-carbazol-9-yl)naphthalen-2-ol (7u)

<sup>1</sup>H NMR (600 MHz, Chloroform-*d*)

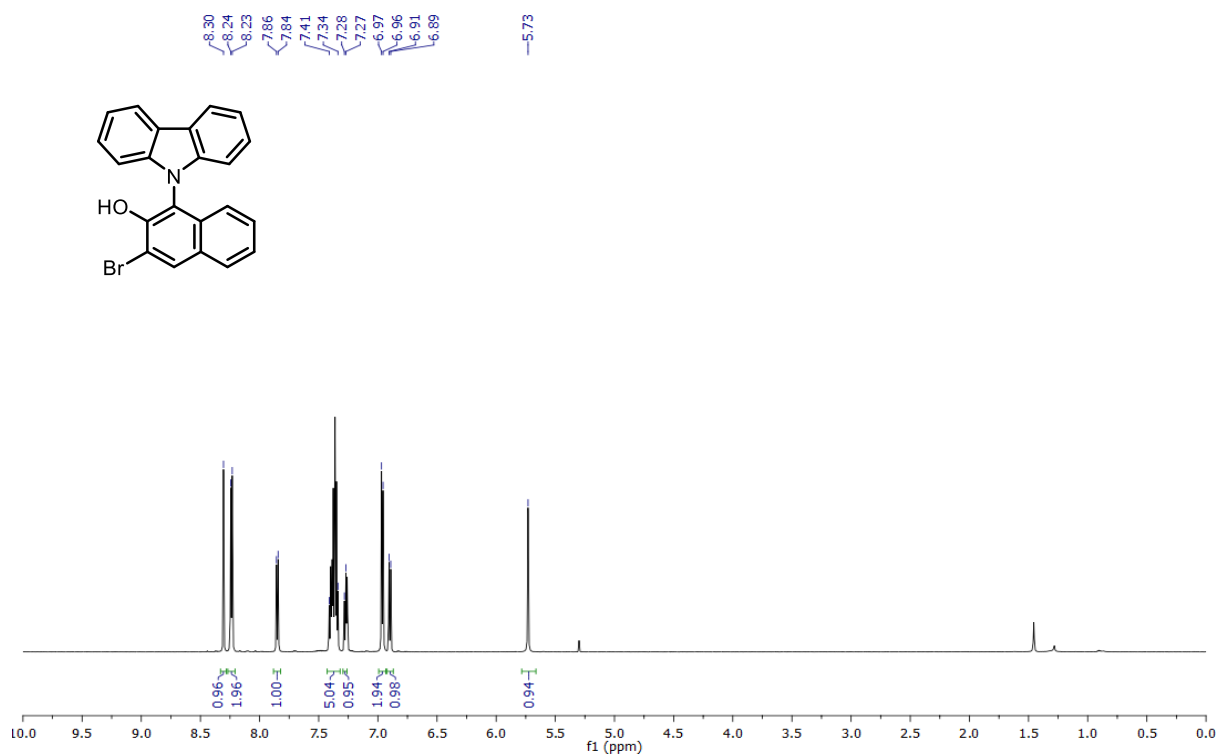

<sup>13</sup>C NMR (151 MHz, Chloroform-*d*)

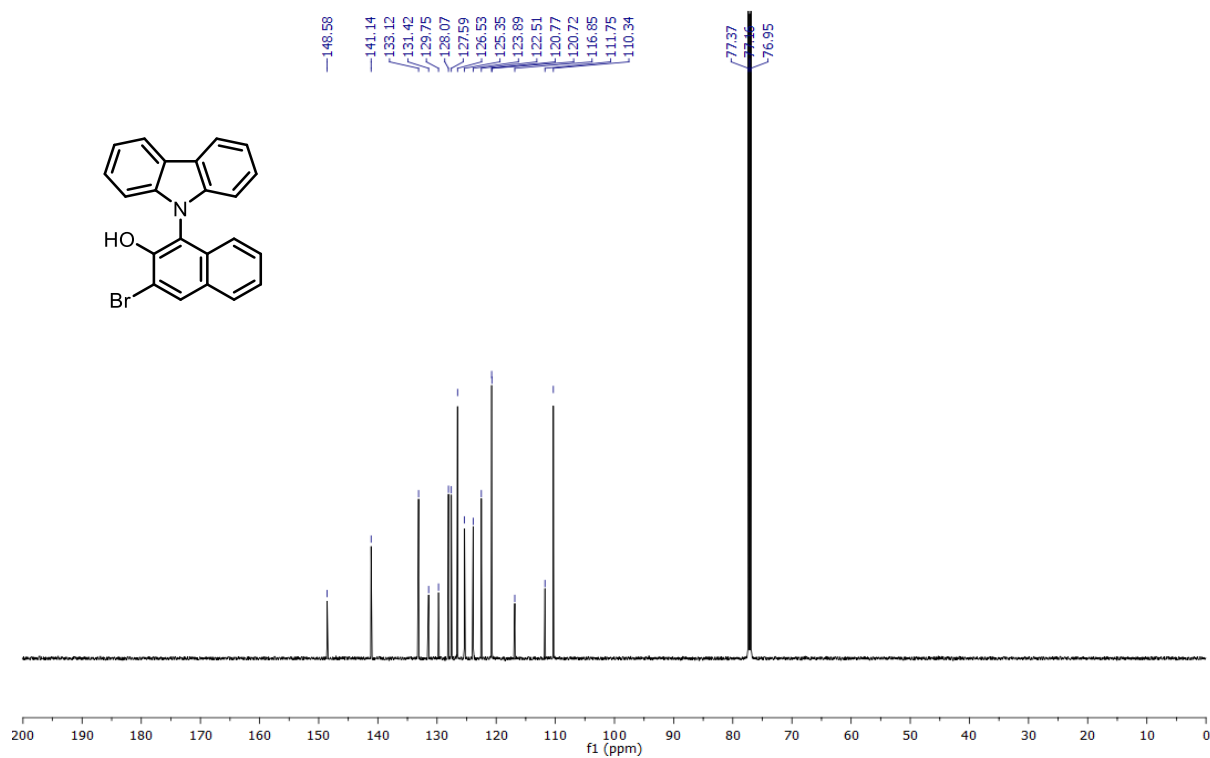



# 10-(9H-Carbazol-9-yl)phenanthren-9-ol (7v)

<sup>1</sup>H NMR (600 MHz, Chloroform-*d*)

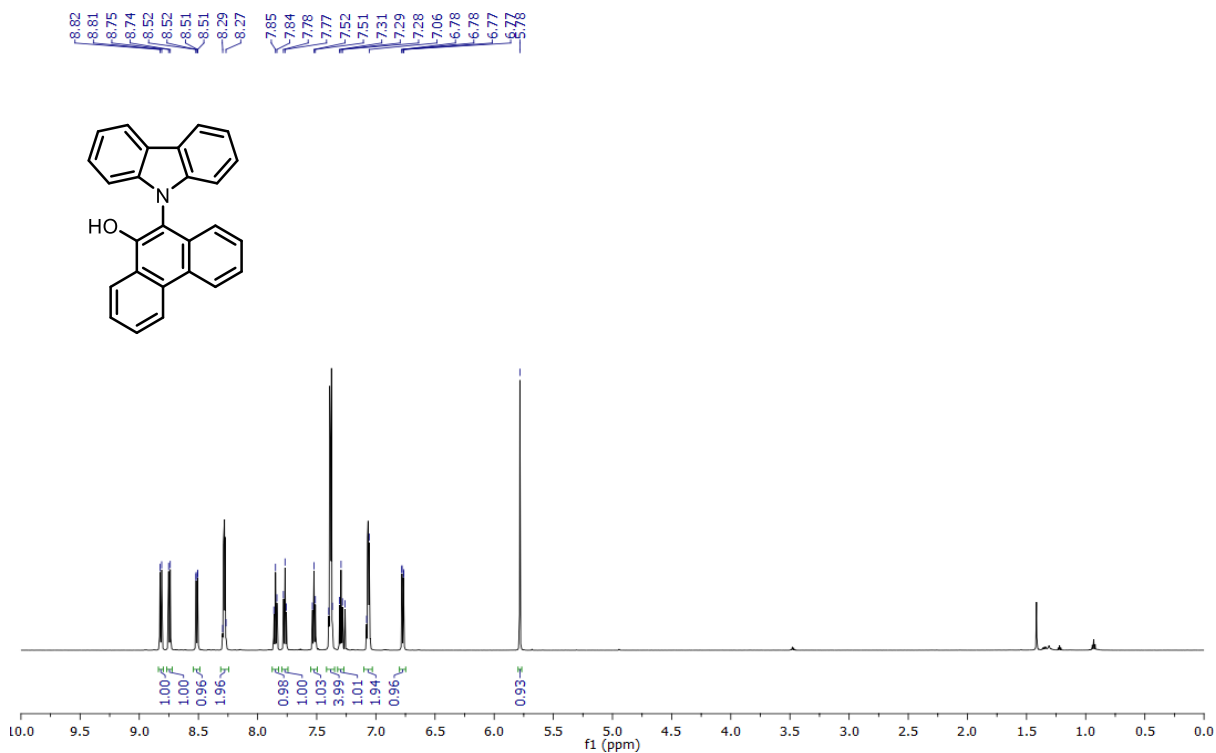

<sup>13</sup>C NMR (151 MHz, Chloroform-*d*)

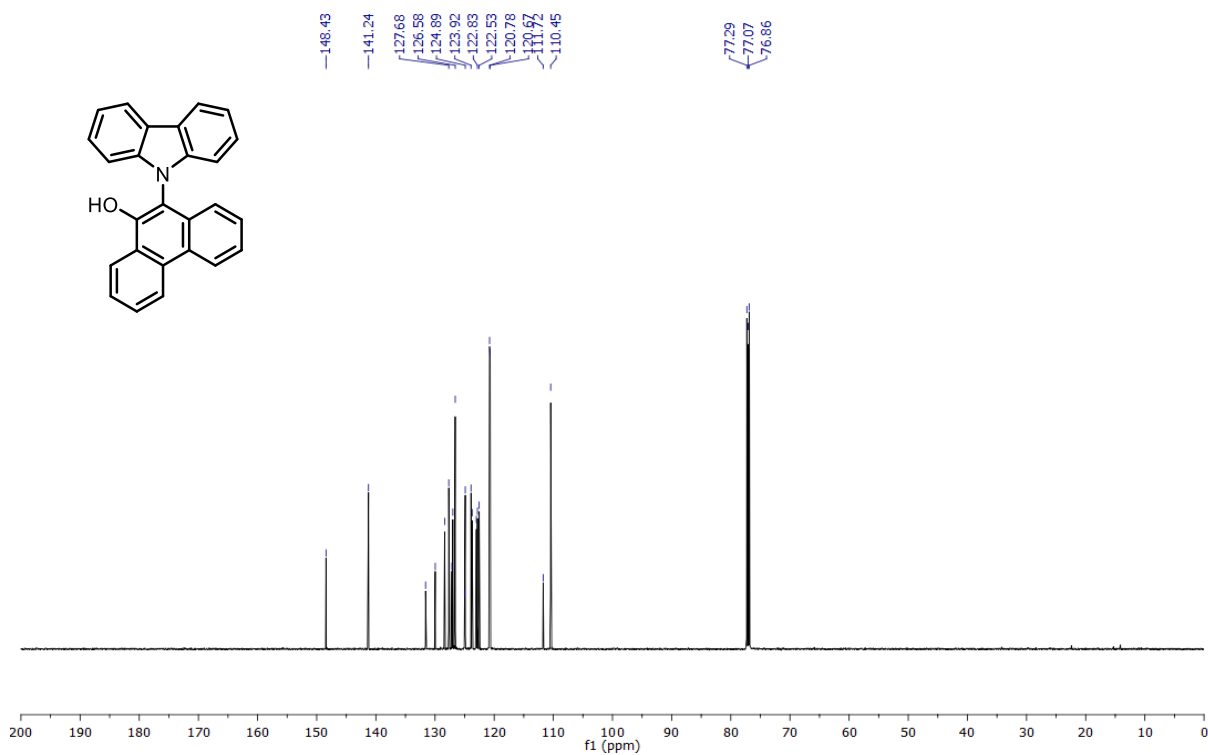

# 1,1'-(9*H*-Carbazole-3,9-diyl)bis(naphthalen-2-ol) (8)

$^1\text{H}$  NMR (600 MHz, Chloroform-*d*)

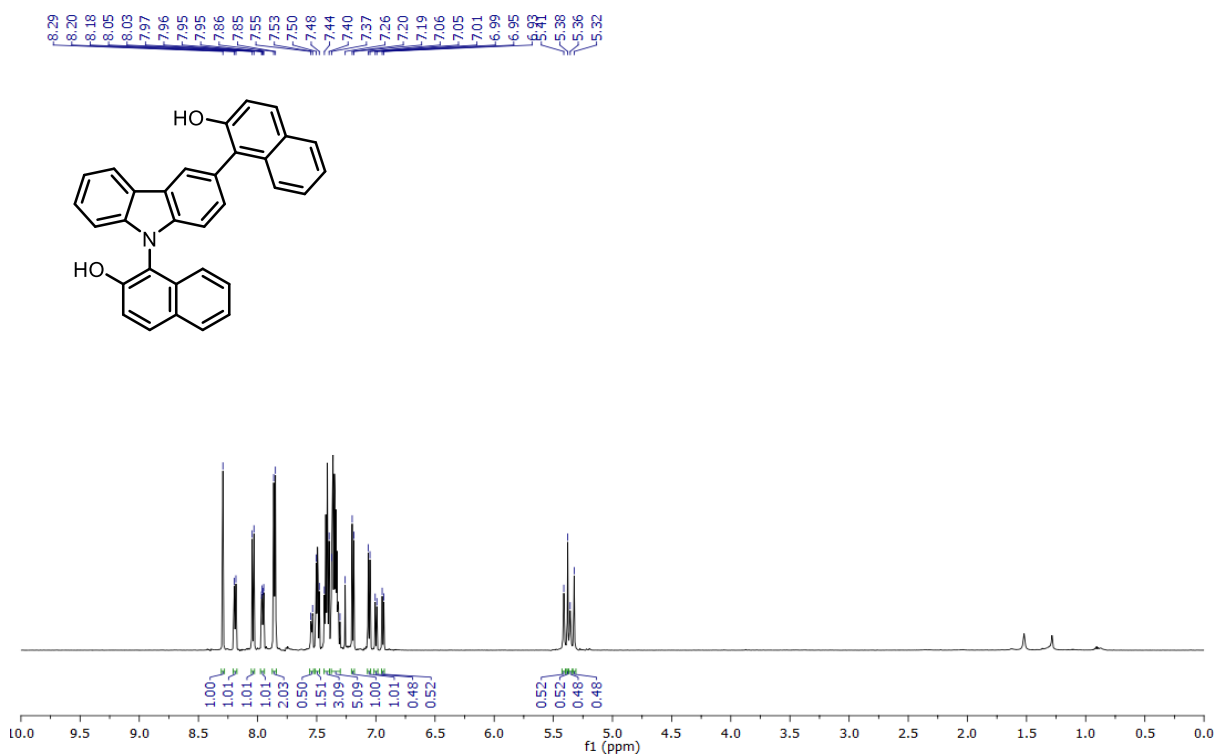

$^{13}\text{C}$  NMR (151 MHz, Chloroform-*d*)

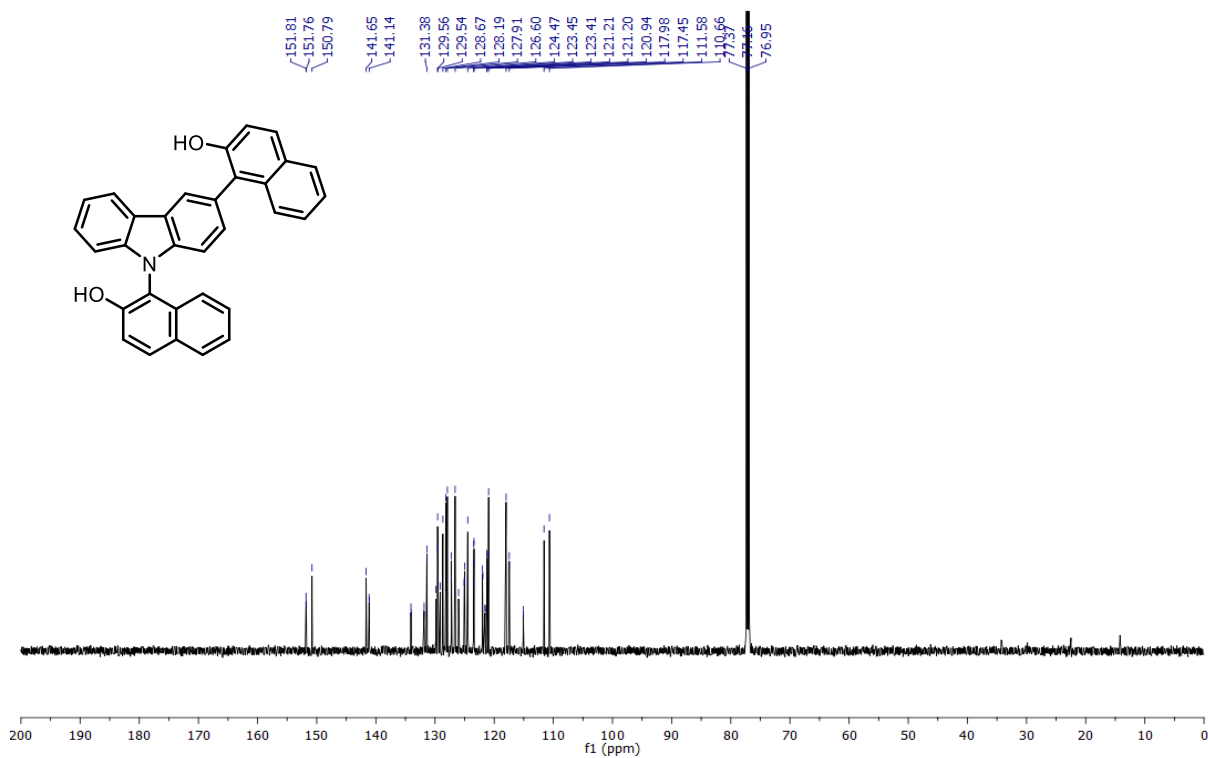

# 1,1'-(9H-Carbazole-3,6-diyl)bis(naphthalen-2-ol) (9)

$^1\text{H}$  NMR (600 MHz, Chloroform-*d*)

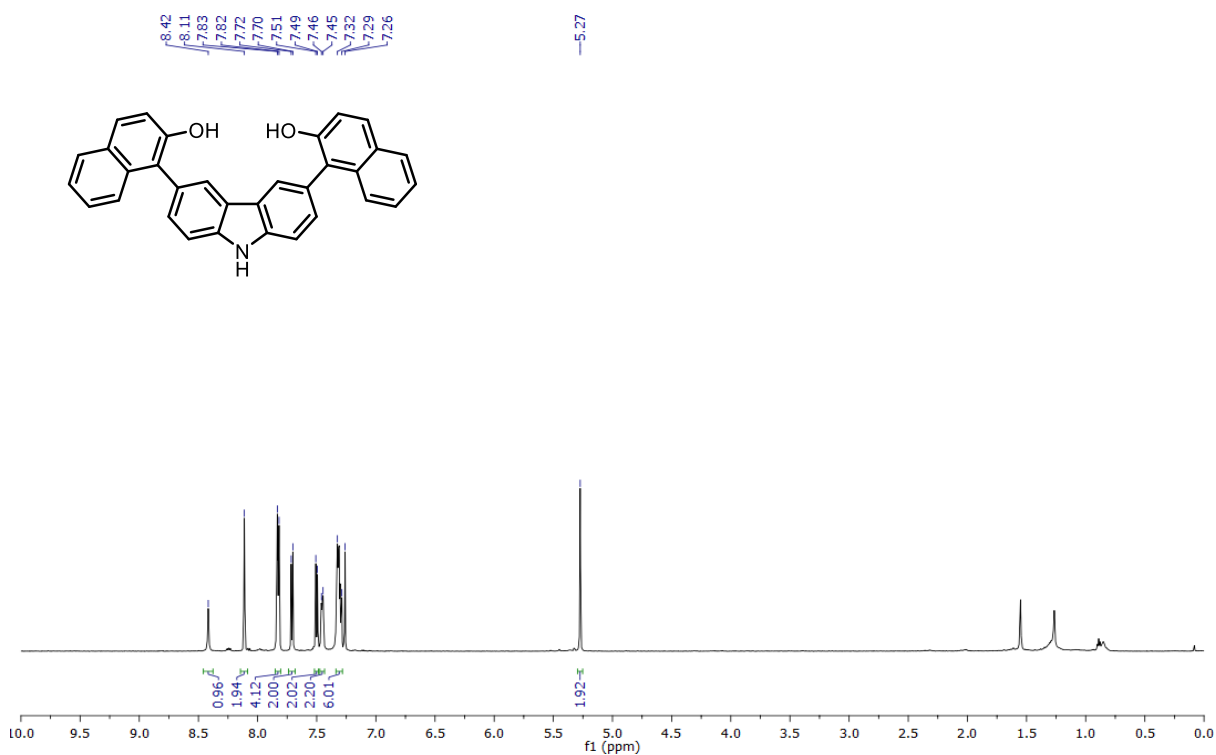

$^{13}\text{C}$  NMR (151 MHz, Chloroform-*d*)

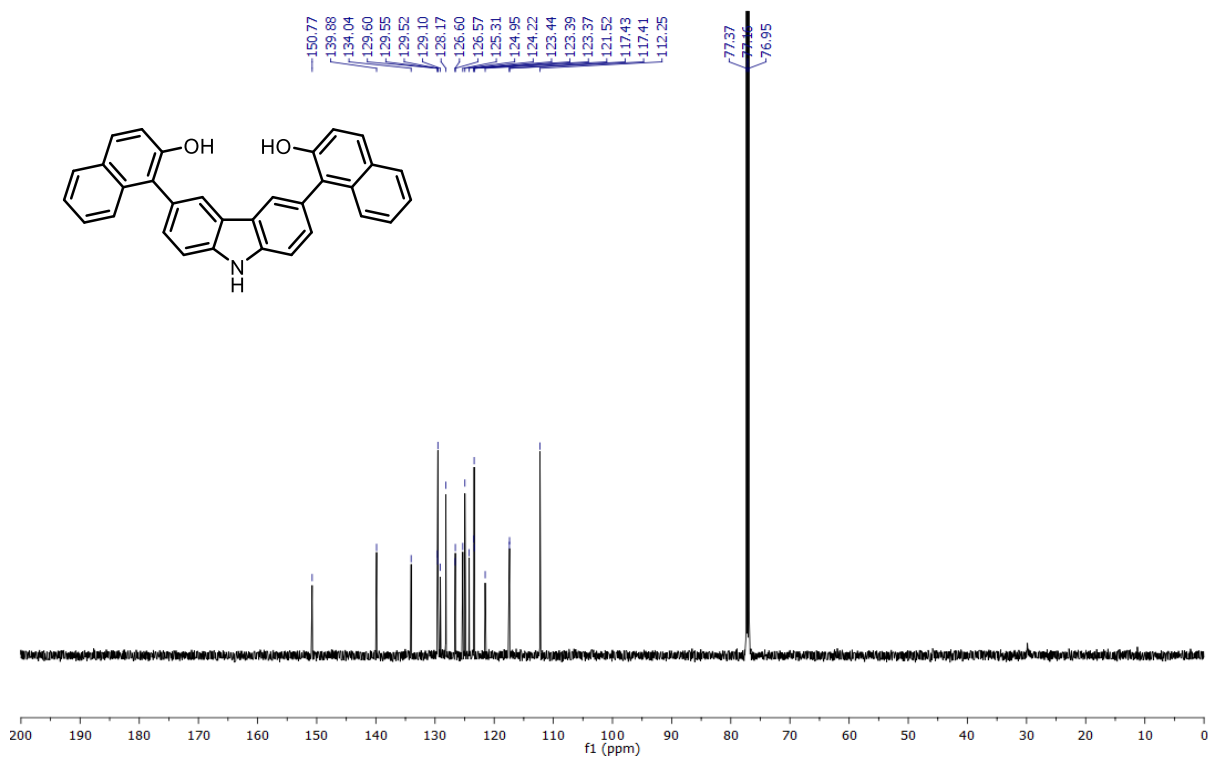

Supplement: d1cc01863a1.pdf [file d1cc01863a1.pdf]
